# Supplementary material for: Unveiling the importance of catalyst framework and non covalent interactions in an asymmetric Fe-catalyzed O–H insertion: insights from computational tools
Source: Royal Society of Chemistry journal article supplement (doi:10.1039/d4cc03498h), 2024-01-01
Supplement: d4cc03498h1.pdf [file d4cc03498h1.pdf]

*Electronic Supporting Information*

**for**

**Unveiling the Importance of Catalyst Framework and Non Covalent  
Interactions in an Asymmetric Fe-Catalyzed O–H Insertion: Insights  
from Computational Tools**

Reena Balhara and Garima Jindal<sup>1\*</sup>

Department of Organic Chemistry, Indian Institute of Science, Bangalore 560012 (India)

## Table of Contents

### List of Tables

|                  | Computational Details                                                                                                                                                                                                                                                                                               | S4      |
|------------------|---------------------------------------------------------------------------------------------------------------------------------------------------------------------------------------------------------------------------------------------------------------------------------------------------------------------|---------|
| <b>Table S1</b>  | Distortion-Interaction Analysis for Different Enol Intermediates                                                                                                                                                                                                                                                    | S8      |
| <b>Table S2</b>  | Energy Decomposition Analysis for <b>D<sub>b</sub></b> and <b>D<sub>d</sub></b> enol                                                                                                                                                                                                                                | S9      |
| <b>Table S3</b>  | Distortion-Interaction Analysis for two lowest diastereomeric TSs for L1*                                                                                                                                                                                                                                           | S9      |
| <b>Table S4</b>  | Distortion-Interaction Analysis for two lowest diastereomeric TSs for L3*                                                                                                                                                                                                                                           | S10     |
| <b>Table S5</b>  | Energy Decomposition Analysis for two lowest diastereomeric TSs for L3*                                                                                                                                                                                                                                             | S11     |
| <b>Table S6</b>  | Relative Free Energies ( $\Delta G$ ) (kcal/mol) for Fe/L1* system at different level of theories for the quintet spin state                                                                                                                                                                                        | S14-S15 |
| <b>Table S7</b>  | Relative Free Energies ( $\Delta\Delta G$ ) (kcal/mol) for Fe/L1* system for the TS( <b>D<sub>f</sub>-P</b> ) <sub>3w</sub> at different level of theories                                                                                                                                                          | S15     |
| <b>Table S8</b>  | Relative Free Energies ( $\Delta\Delta G$ ) (kcal/mol) for Fe/L2* system for the TS( <b>D<sub>f</sub>-P</b> ) <sub>3w</sub> at different level of theories                                                                                                                                                          | S16     |
| <b>Table S9</b>  | Relative Free Energies ( $\Delta\Delta G$ ) (kcal/mol) for Fe/L3* system for the TS( <b>D<sub>f</sub>-P</b> ) <sub>3w</sub> at different level of theories                                                                                                                                                          | S16     |
| <b>Table S10</b> | Total Electronic Energies (a.u.) for Fe/L1* system at the SMD <sub>(chloroform)</sub> /(U)B3LYP-D3(BJ)/6-311++G(d,p),SDD(Fe)//(U)B3LYP-D3(BJ)/6-31G(d,p),LANL2DZ(Fe) for different spin states                                                                                                                      | S16     |
| <b>Table S11</b> | Total Electronic Energies (a.u.) for Fe/L1* system at the SMD <sub>(chloroform)</sub> /UB3LYP-D3(BJ)/6-311++G(3df,3pd),SDD(Fe)//UB3LYP-D3(BJ)/6-31G(d,p),LANL2DZ(Fe) ( <b>X</b> ) and SMD <sub>(chloroform)</sub> /ωB97M-V/def2-QZVPP//UB3LYP-D3(BJ)/6-31G(d,p),LANL2DZ(Fe) ( <b>Y</b> ) for the quintet spin state | S16-S18 |

### List of Figures

|                 |                                                                                                                                                                                                                                                                                             |          |
|-----------------|---------------------------------------------------------------------------------------------------------------------------------------------------------------------------------------------------------------------------------------------------------------------------------------------|----------|
| <b>Fig. S1</b>  | Free energy profile for the metal-ylide formation at different spin states at the SMD <sub>(chloroform)</sub> /(U)B3LYP-D3(BJ)/6-311++G(d,p),SDD(Fe)//BS1                                                                                                                                   | S5       |
| <b>Fig. S2</b>  | Free energy profile for the different possible pathways from metallocarbene, <b>A</b> to form metal-ylide, <b>B</b> for the quintet spin state                                                                                                                                              | S6       |
| <b>Fig. S3</b>  | Free energy profile for the metal free pathway                                                                                                                                                                                                                                              | S7       |
| <b>Fig. S4</b>  | Activation free energies (kcal/mol) of all possible conformers for ( <b>R</b> )-TS( <b>Df-P</b> ) <sub>3w</sub> (from <i>si</i> -face) and ( <b>S</b> )-TS( <b>Df-P</b> ) <sub>3w</sub> (from <i>re</i> -face) at the SMD <sub>(chloroform)</sub> /UB3LYP-D3(BJ)/6-311++G(d,p),SDD(Fe)//BS1 | S7       |
| <b>Fig. S5</b>  | Free energy profile for the [1,3]-proton transfer from all possible enols                                                                                                                                                                                                                   | S8       |
| <b>Fig. S6</b>  | Optimized geometries of lowest energy diastereomeric TSs for the Fe/L1* system for the quintet spin state                                                                                                                                                                                   | S9       |
| <b>Fig. S7</b>  | Optimized geometries of key TSs for the quintet spin state for the Fe/L1* system                                                                                                                                                                                                            | S10      |
| <b>Fig. S8</b>  | Optimized geometries of two lowest diastereomeric TSs for the Fe/L2* system for the quintet spin state                                                                                                                                                                                      | S11      |
| <b>Fig. S9</b>  | Optimized geometries of two lowest diastereomeric TSs for the Fe/L3* system for the quintet spin state. Given all the distances (Å) of non-covalent interactions with the electron densities ( $\rho \times 10^{-2}$ au) in parenthesis at the bond critical points ( <i>bcps</i> )         | S13      |
| <b>Fig. S10</b> | Space filling models for the lowest TSs for (a) O–H insertion and (b) indole alkylation catalyzed by Fe/L2*                                                                                                                                                                                 | S13      |
| <b>Fig. S11</b> | Relaxed PES for the ( <i>si</i> ) to ( <i>re</i> )-face conversion along Fe1-O2-C3-C4 dihedral angle                                                                                                                                                                                        | S14      |
|                 | References                                                                                                                                                                                                                                                                                  | S18-S19  |
|                 | Coordinates of Optimized Geometries                                                                                                                                                                                                                                                         | S19-S111 |

## Computational Details

Geometry optimizations were performed with the (U)B3LYP<sup>1</sup> functional augmented with D3(BJ) empirical dispersion correction in G16 software.<sup>2</sup> For geometry optimization in the gas phase, the standard split valence 6-31G(d,p) basis set was used for all atoms except Fe, for which, LANL2DZ was used<sup>3</sup> (BS1 = (U)B3LYP-D3(BJ)/6-31G(d,p),LANL2DZ(Fe)). Harmonic vibrational frequency calculations were conducted for all stationary points to confirm whether they are local minima or transition state structures at the same level of theory and to determine the thermal corrections for the enthalpies, free energies and entropies.<sup>4</sup> Further, the transition states were characterized by intrinsic reaction coordinate (IRC) analysis, to ensure the stationary points were connected to each other.<sup>5</sup> For single-point energy calculations, solvent effects were taken into account using the SMD continuum solvation model in chloroform.<sup>6</sup> Single-point energy calculations were carried out at the 6-311+G(3df,3pd) basis set for all atoms other than Fe, for which SDD<sup>7</sup> basis set consisting of Stuttgart–Dresden effective core potential (ECP) was used on the (U)B3LYP-D3(BJ)/6-31G(d,p)-optimized stationary points (BS2 = (U)B3LYP-D3(BJ)/6-311++G(3df,3pd),SDD(Fe)). Further for the tautomerization step, the lowest diastereomeric TSs were optimized in the solvent phase to ensure the correct energy difference at the SMD<sub>(chloroform)</sub>/(U)B3LYP-D3(BJ)//6-311+G(3df,3pd)//SMD<sub>(chloroform)</sub>/(U)B3LYP-D3(BJ)/6-31G(d,p) using the G09 program.<sup>8</sup> Additional single point calculations were also done at the  $\omega$ B97M-V/def2-QZVPP functional to ensure the trend of the free energy profile is not changing appreciably.<sup>9</sup> The high-Level ab initio DLPNO-CCSD(T) calculations and  $\omega$ B97M-V calculations were performed using the ORCA 5.0.4 software.<sup>10</sup> Gibbs free energies are reported using GoodVibes package wherein Truhlar-type quasi harmonic corrections are incorporated, where entropy terms for lower frequencies ( $<100\text{cm}^{-1}$ ) were calculated from free-rotor approximation.<sup>11</sup> The energy decomposition analysis (EDA) was performed using the Amsterdam Density Functional (ADF) software, employing the unrestricted fragment approach at the B3LYP-D3(BJ) functional with a triple- $\zeta$  basis set, excluding solvent effects.<sup>12</sup> Analyses of electron densities was performed using AIMAll software which operates based on Bader's AIM (Atoms-in-Molecule) framework.<sup>13</sup>

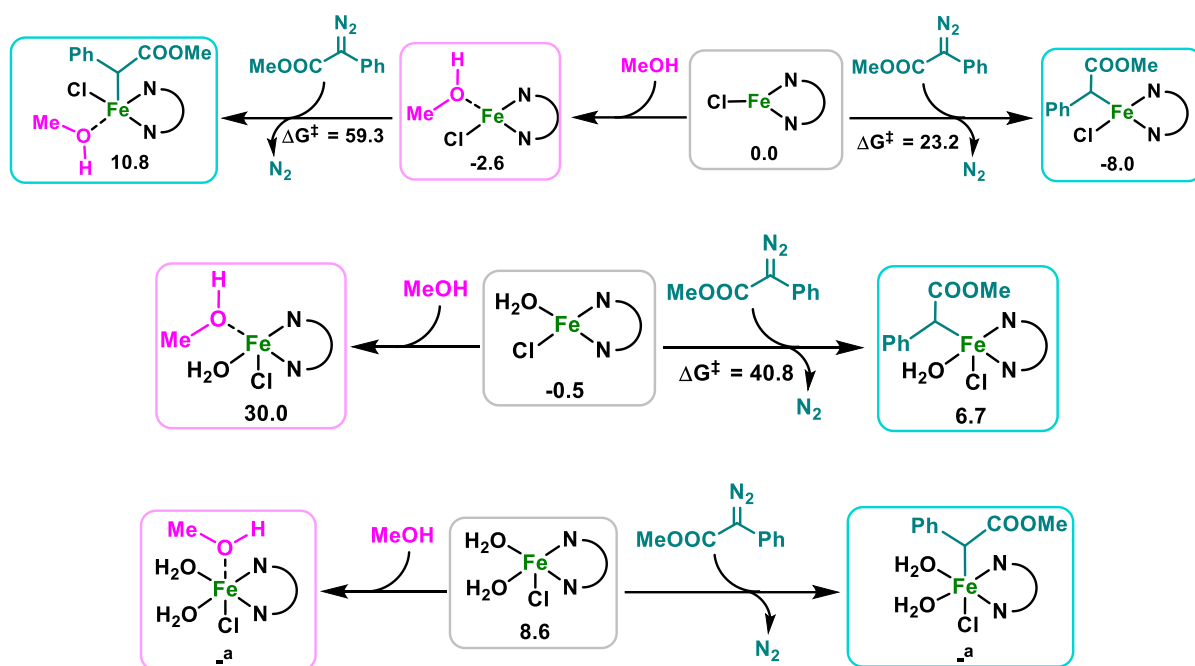

**Scheme 1** Different possible active species for  $\text{Fe}(\text{Cl}_2)\cdot 4\text{H}_2\text{O}/\text{L1}^*$  catalyzed O–H insertion reaction and comparison of preference of attack between two reactants (diazide and methanol). The relative free energy barriers ( $\Delta G$ ) are given in kcal/mol. <sup>a</sup>Substrate is going away from the catalyst.

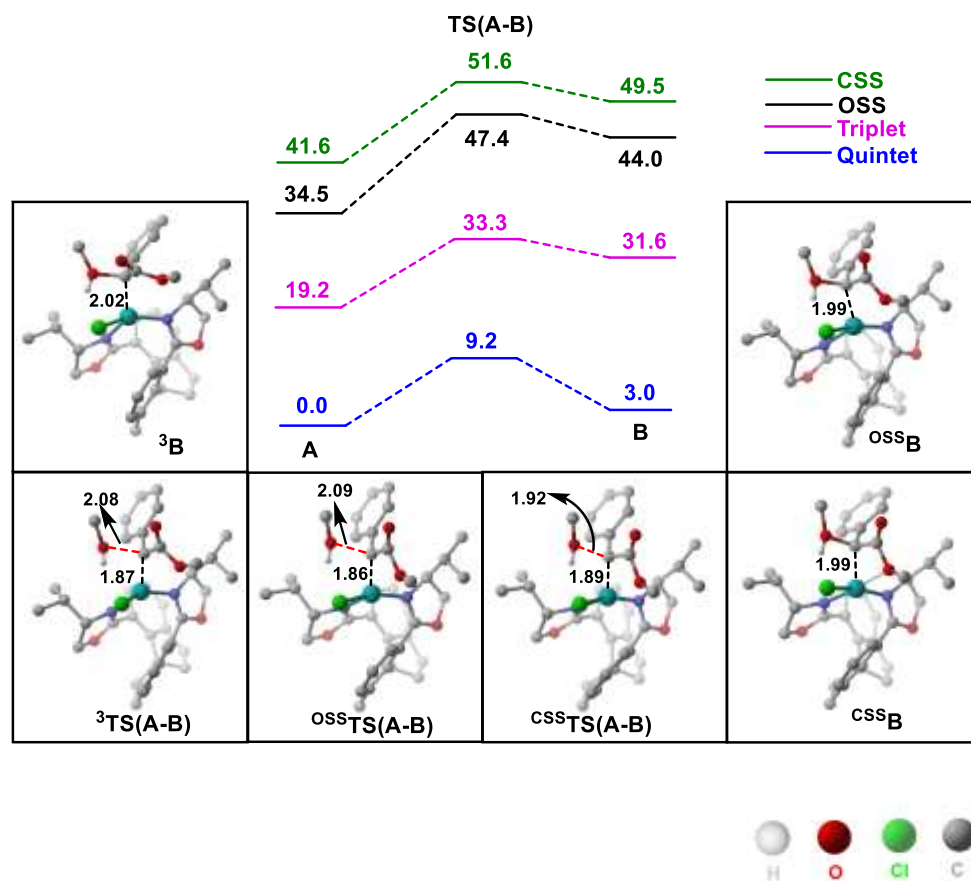

**Fig. S1** Free energy profile for the metal-ylide formation at different spin states at the  $\text{SMD}_{(\text{chloroform})}/(\text{U})\text{B3LYP-D3(BJ)}/6\text{-}311\text{++G(d,p),SDD(Fe)}/\text{BS1}$ . Distances are in Å. Hydrogens are omitted for clarity. OSS = Open-shell singlet and CSS = closed-shell singlet.

The HAT (hydrogen atom transfer) pathway via **TS(A-H)** is 23.8 kcal/mol higher in energy than the nucleophilic pathway. Also, an alternative pathway where methanol first attacks Fe via **TS(A-E)**, which is then followed by a migratory insertion through **TS(E-B)** to yield **B** is 3.2 kcal/mol higher than **TS(A-B)** as seen in Fig. S2.

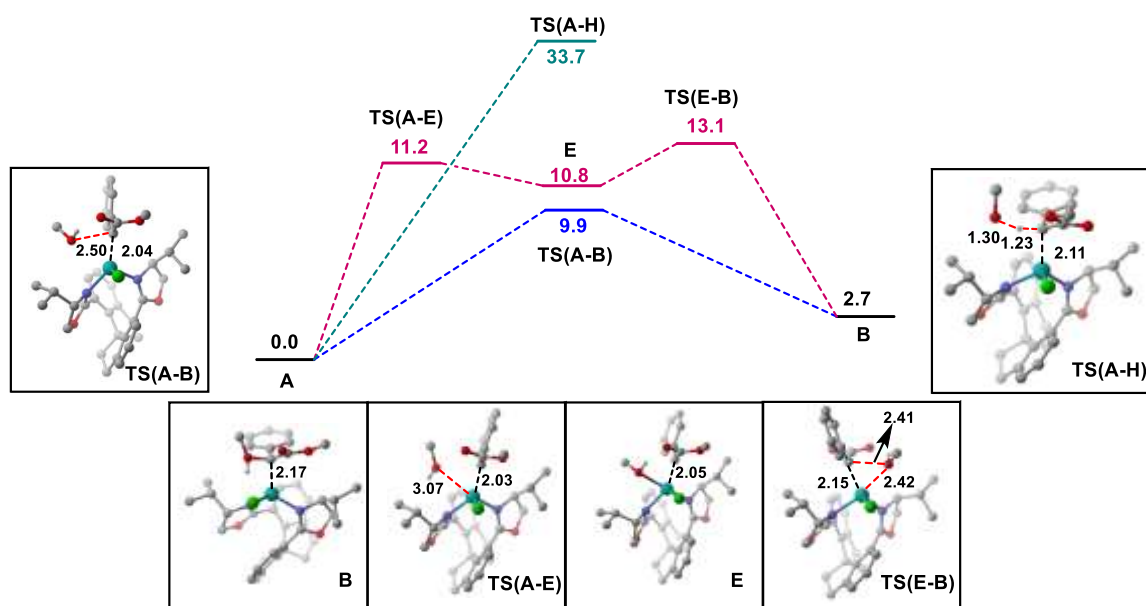

**Fig. S2** Free energy profile for the different possible pathways from metalcarbene, **A** to form metal-ylide, **B** for the quintet spin state. Distances are in Å. Hydrogens are omitted for clarity.

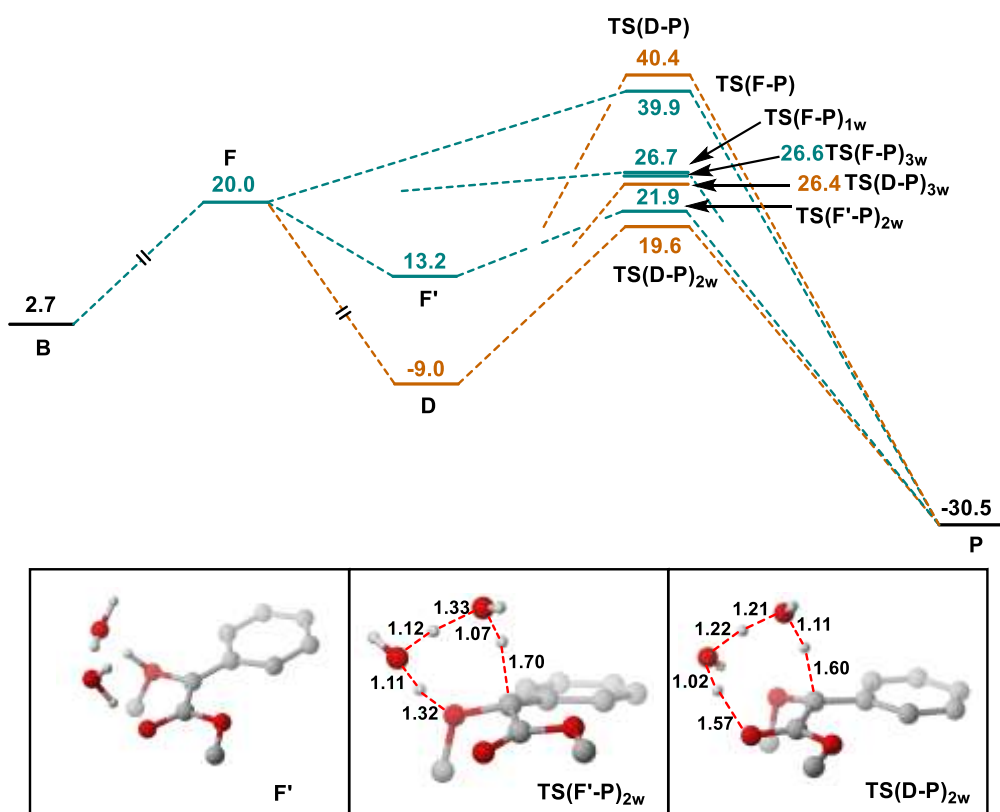

**Fig. S3** Free energy profile for the metal free pathway. Distances are in Å. Hydrogens are omitted for clarity.

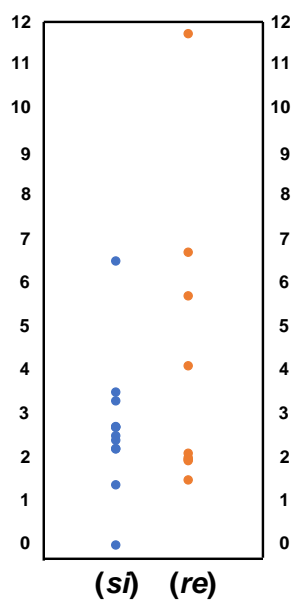

**Fig. S4** Activation free energies (kcal/mol) of all possible conformers for *(R)*-TS(D<sub>f</sub>-P)<sub>3w</sub> (from *si*-face) and *(S)*-TS(D<sub>f</sub>-P)<sub>3w</sub> (from *re*-face) at the SMD<sub>(chloroform)</sub>/UB3LYP-D3(BJ)/6-311++G(d,p),SDD(Fe)//BS1.

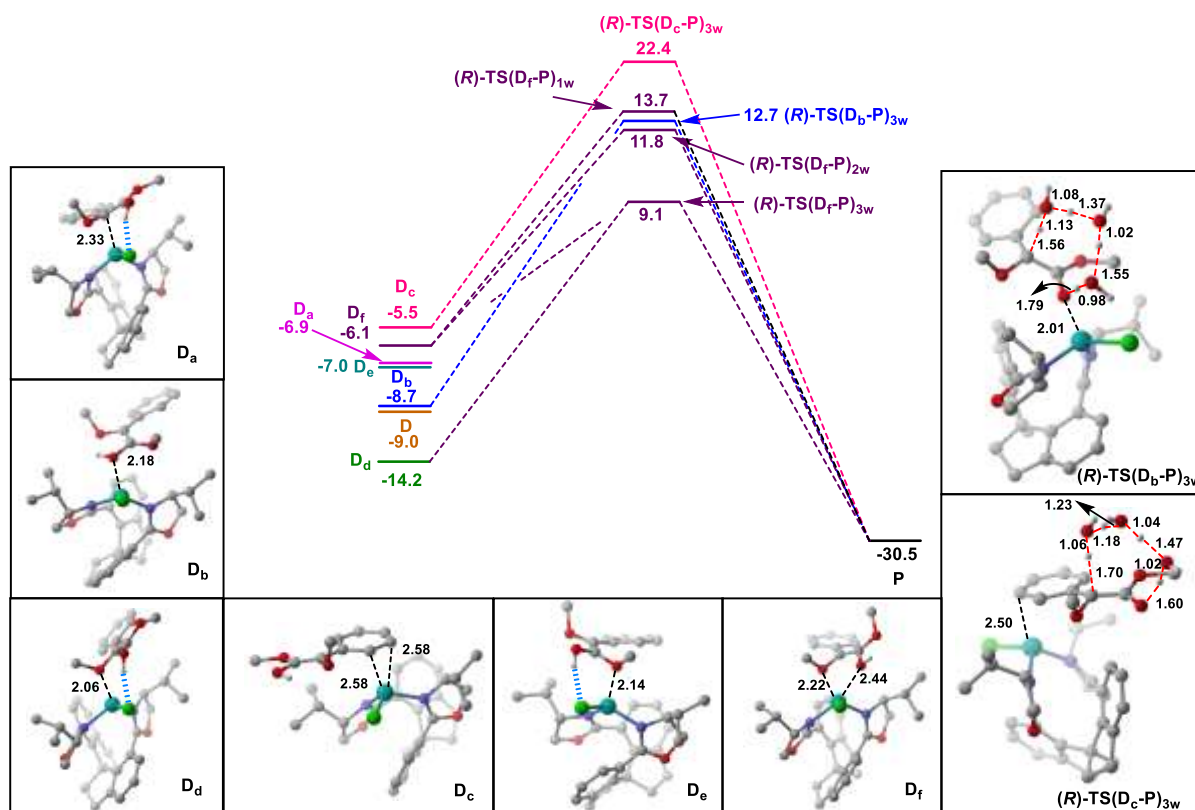

**Fig. S5** Free energy profile for the [1,3]-proton transfer from all possible enols. All the free energy are reported in kcal/mol.

**Table S1** Distortion-Interaction Analysis for Different Enols

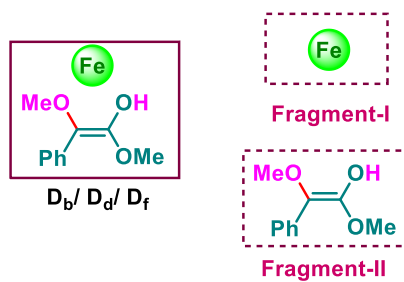

|                      | Distortion energy |             | Interaction energy |
|----------------------|-------------------|-------------|--------------------|
|                      | Fragment-I        | Fragment-II |                    |
| <b>D<sub>b</sub></b> | 0.9               | 1.5         | -19.4              |
| <b>D<sub>d</sub></b> | 2.4               | 4.7         | -29.8              |
| <b>D<sub>f</sub></b> | 3.8               | 8.1         | -26.7              |

**Table S2** Energy Decomposition Analysis for **D<sub>b</sub>** and **D<sub>d</sub>** enol



|                                  | <b>D<sub>b</sub></b> | <b>D<sub>a</sub></b> |
|----------------------------------|----------------------|----------------------|
| <b>Total Pauli Repulsion</b>     | 70.58                | 105.13               |
| <b>Electrostatic Interaction</b> | -51.99               | -77.52               |
| <b>Orbital Interaction</b>       | -33.53               | -40.4                |
| <b>Dispersion Energy</b>         | -17.9                | -21.9                |
| <b>Total Bonding Energy</b>      | -32.84               | -34.3                |

**Table S3** Distortion-Interaction Analysis for two lowest diastereomeric TSs for L1\*<sup>a</sup>

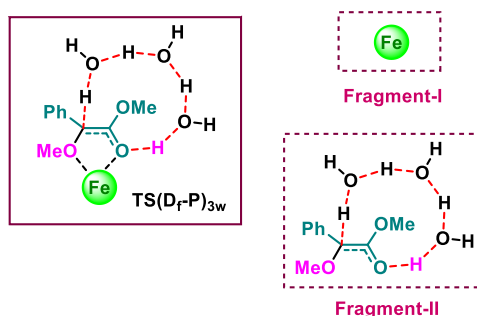

|                                  | <b>Distortion energy</b> |                    | <b>Interaction energy</b> |
|----------------------------------|--------------------------|--------------------|---------------------------|
|                                  | <b>Fragment-I</b>        | <b>Fragment-II</b> |                           |
| <b>(R)-TS(Df-P)<sub>3w</sub></b> | 11.4                     | 1.5                | -47.4                     |
| <b>(S)-TS(Df-P)<sub>3w</sub></b> | 11.4                     | 2.5                | -45.0                     |

<sup>a</sup>Geometry optimizations at the SMD<sub>(chloroform)</sub>/UB3LYP-D3(BJ)/6-311++G(3df,3pd),SDD(Fe)//SMD<sub>(chloroform)</sub>/UB3LYP-D3(BJ)/6-31G(d,p),LANL2DZ(Fe) level of theory.

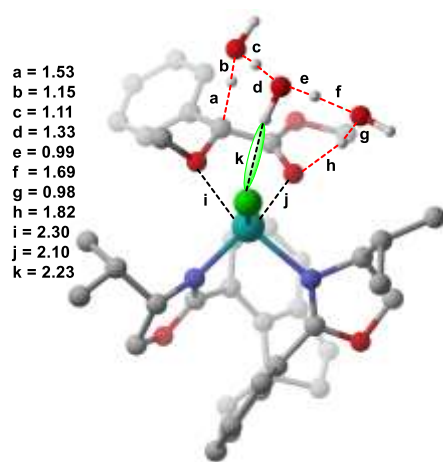

**(R)-TS(Df-P)<sub>3w</sub>** (0.0, 0.0)

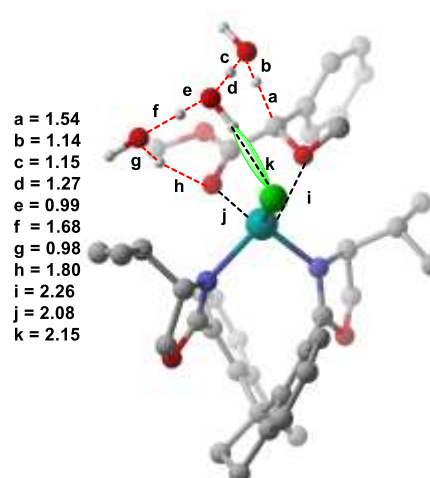

**(S)-TS(Df-P)<sub>3w</sub>** (1.8, 1.7)

**Fig. S6** Optimized geometries of lowest energy diastereomeric TSs for the Fe/L1\* system for the quintet spin state. The H-bonding interaction of the water molecule with the chloride is shown in the green circle. All distances are in Å. Relative free energies (kcal/mol) are reported at the SMD<sub>(chloroform)</sub>/BS2//BS1 with or without Truhlar's Quasi Harmonic correction respectively.

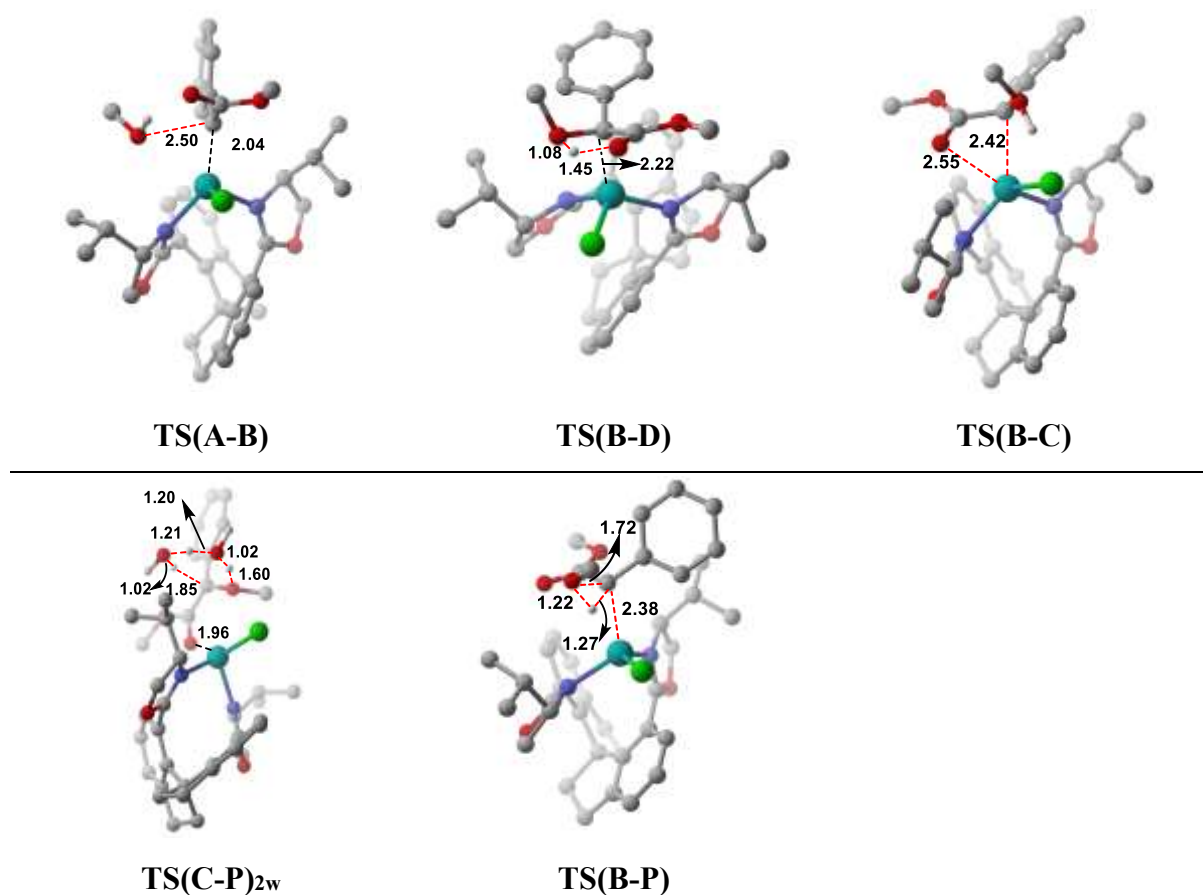

**Fig. S7** Optimized geometries of key TSs for the quintet spin state for the Fe/L1\* system. Distances are in Å.

**Table S4** Distortion-Interaction Analysis for two lowest diastereomeric TSs for L3\*

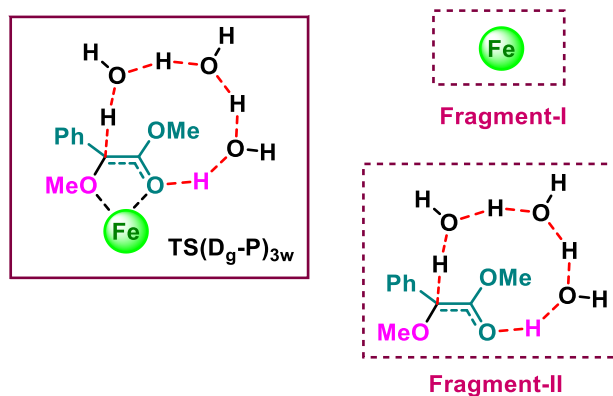

|                                    | Distortion energy |             | Interaction energy |
|------------------------------------|-------------------|-------------|--------------------|
|                                    | Fragment-I        | Fragment-II |                    |
| <i>(R)</i> -TS(Df-P) <sub>3w</sub> | 5.6               | 2.4         | -52.4              |
| <i>(S)</i> -TS(Df-P) <sub>3w</sub> | 5.7               | 2.6         | -49.6              |

**Table S5** Energy Decomposition Analysis for two lowest diastereomeric TSs for L3\*

|                                  | <i>(R)</i> -TS(Df-P) <sub>3w</sub> | <i>(S)</i> -TS(Df-P) <sub>3w</sub> |
|----------------------------------|------------------------------------|------------------------------------|
| <b>Total Pauli Repulsion</b>     | 117.07                             | 106.31                             |
| <b>Electrostatic Interaction</b> | -108.96                            | -100.5                             |
| <b>Orbital Interaction</b>       | -64.11                             | -58.14                             |
| <b>Dispersion Energy</b>         | -26.78                             | -24.57                             |
| <b>Total Bonding Energy</b>      | -82.78                             | -76.91                             |

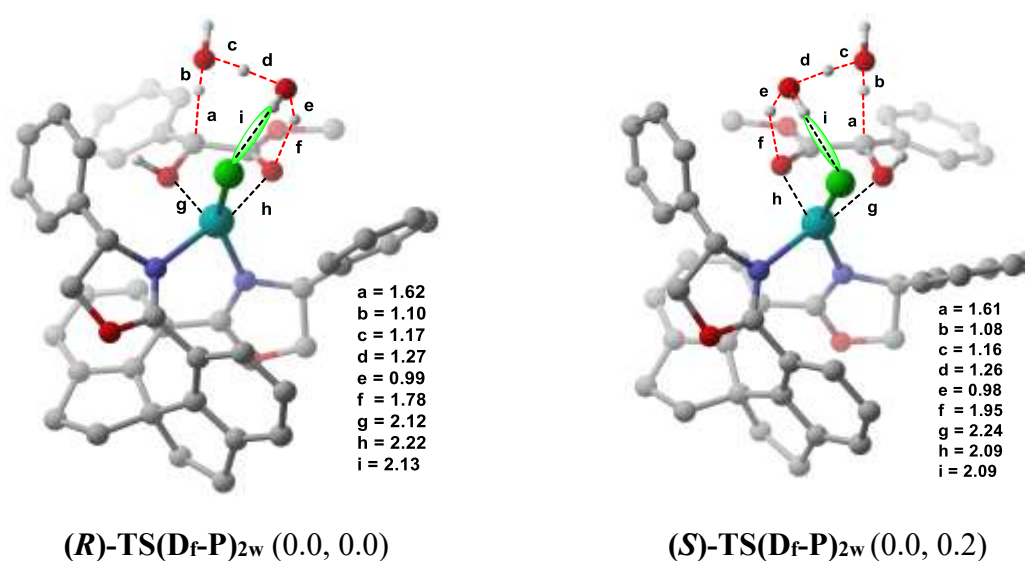

**Fig. S8** Optimized geometries of two lowest diastereomeric TSs for the Fe/L2\* system on the quintet surface at the SMD<sub>(chloroform)</sub>/BS2//BS1 level of theory with or without Truhlar's Quasi Harmonic correction respectively. Distances are in Å. The H-bonding interaction of the water molecule with the chloride is shown in the green circle.

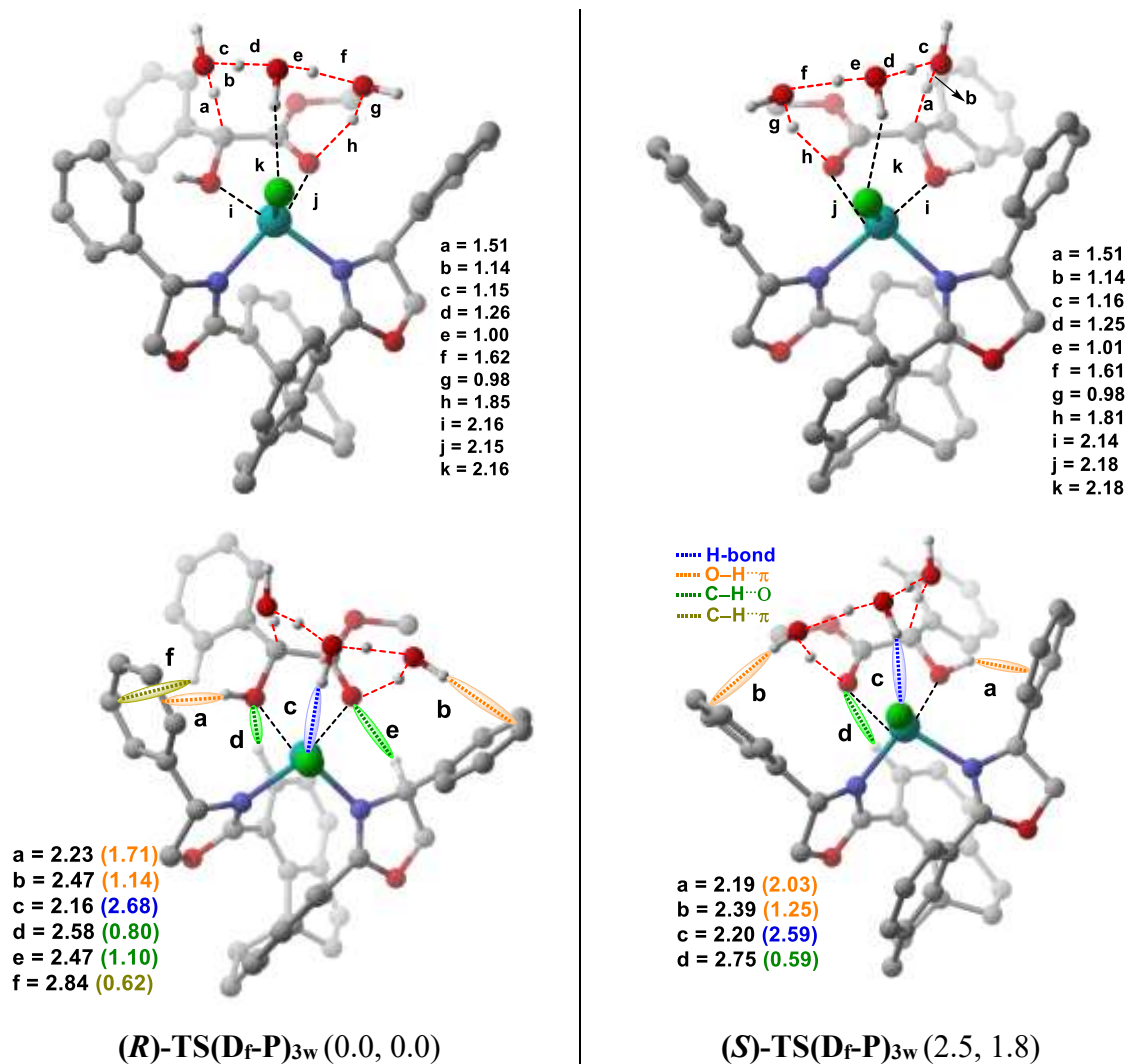

**Fig. S9** Optimized geometries of two lowest diastereomeric TSs for the Fe/L3\* system on the quintet surface at the SMD<sub>(chloroform)</sub>/BS2//BS1 with or without Truhlar's Quasi Harmonic correction respectively. Distances are in Å. Given all the distances (Å) of non-covalent interactions with the electron densities ( $\rho \times 10^{-2}$  au) in parenthesis at the bond critical points (*bcps*).

As can be seen from Fig. S8 and S9, the energy difference between two diastereomeric TSs for Fe/L3\* and Fe/L2\* is 2.0 and 0.0 kcal/mol, respectively. For Fe/L2\*, an *ee* of ~30% is reported which is difficult to calculate due to calculation errors associated with computational methods. For the Fe/L3\*, the energy difference is due to the stronger interaction between the substrate and the catalyst (-52.4 vs -49.6 kcal/mol) (Table S4 and S5), primarily electrostatic interactions, which can be seen from Fig. S9, where the **(R)-TS(Df-P)<sub>3w</sub>** has additional C-H...O (e) and C-H... $\pi$  (f) interactions.

For the Fe-catalyzed O–H insertion reaction, the L2\* ((*R*<sub>a</sub>,*S*,*S*)-Ph) yields low *ee*, in contrast, for the Fe/L2\* catalyzed indole alkylation, the L2\* showed moderate *ee* of 78%, while for L3\* (L3\* = (*S*<sub>a</sub>,*S*,*S*)-Ph) very low *ee* was observed.<sup>14</sup> As can be seen from Fig. 4 of the main text, there is ample free space for the substrate in the case of L2\*, illustrating the poor interaction of the substrate with the catalyst (Fig. S8). In the case of indole alkylation catalyzed by Fe/L2\*, enol binds to Fe through its OH group only and van der Waals surface showed weaker interaction of enol with the chiral catalyst. However, in contrast to O–H insertion, the *ee* was not significantly low, possibly due to the bulky nature of the indole, which can provide moderate interactions with ligands, as seen from Fig. S10(b). Therefore, introducing strongly coordinating and slightly polarizable substituents on the substrate could be beneficial for achieving high *ee*.

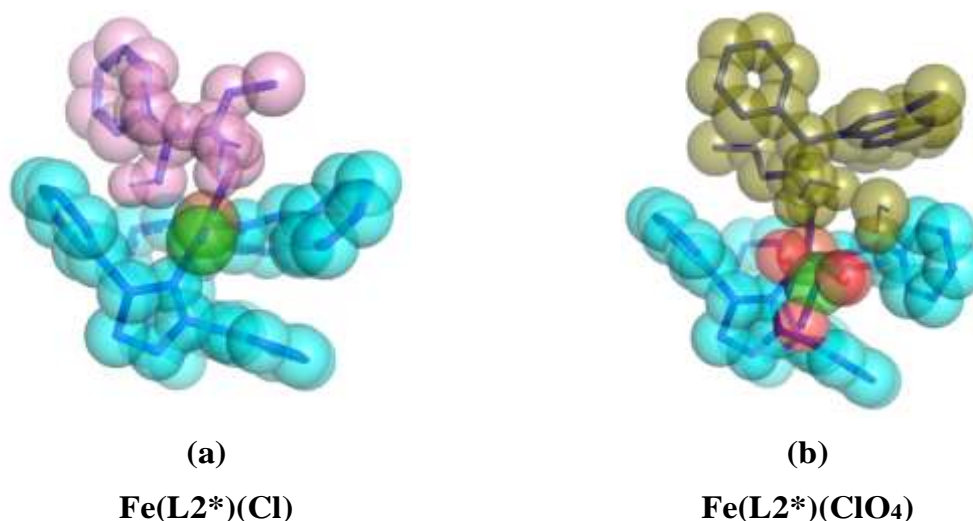

**Fig. S10** Space filling models for the lowest TSs for (a) O–H insertion and (b) indole alkylation catalyzed by Fe/L2\*. The catalysts are in cyan and substrates along with the water molecules are in purple and olive respectively.

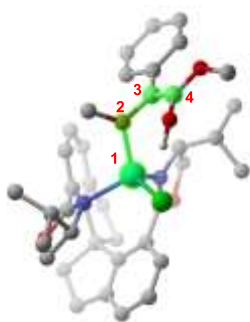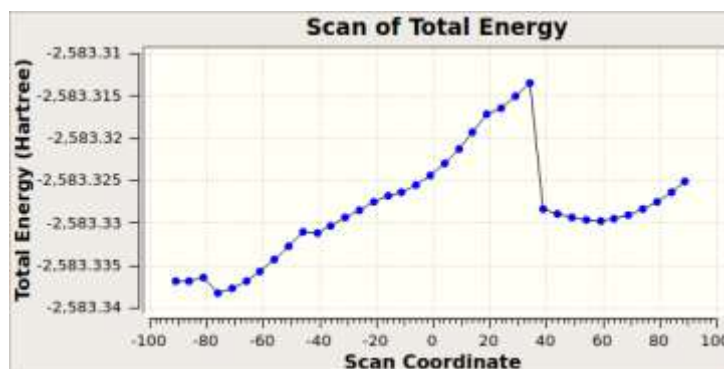

**Fig. S11** Relaxed PES for the (*si*) to (*re*)-face conversion along Fe1-O2-C3-C4 dihedral angle at the SMD<sub>(chloroform)</sub>/UB3LYP-D3(BJ)/6-311++G(d,p),SDD(Fe)//UB3LYP-D3(BJ)/6-31G(d,p),LANL2DZ(Fe).

**Table S6** Relative Free Energies ( $\Delta G$ ) (kcal/mol) for Fe/L1\* system at different level of theories for the quintet spin state

|                                         | <b>X</b> | <b>Y</b> | <b>Z</b> |
|-----------------------------------------|----------|----------|----------|
| <b>A</b>                                | 0.0      | 0.0      | 0.0      |
| <b>TS(A-B)</b>                          | 10.2     | 9.9      | 8.6      |
| <b>B</b>                                | 3.9      | 2.7      | -1.5     |
| <b>TS(B-D<sub>a</sub>)</b>              | 7.6      | 6.3      | 1.7      |
| <b>TS(B-D<sub>a</sub>)<sub>1w</sub></b> | 9.2      | 8.8      | -        |
| <b>TS(B-C)</b>                          | 15.1     | 14.1     | 7.3      |
| <b>(R)-TS(B-P)</b>                      | 35.9     | 35.2     | 33.0     |
| <b>C</b>                                | -2.9     | -1.8     | -8.3     |
| <b>(R)-TS(C-P)<sub>1w</sub></b>         | 19.6     | 21.3     | 11.9     |
| <b>(R)-TS(C-P)<sub>2w</sub></b>         | 11.1     | 12.2     | 5.3      |
| <b>(R)-TS(C-P)<sub>3w</sub></b>         | 12.3     | 13.8     | 7.4      |
| <b>D</b>                                | -8.4     | -9.0     | -12.8    |
| <b>D<sub>a</sub></b>                    | -5.9     | -6.9     | -11.8    |
| <b>D<sub>b</sub></b>                    | -9.0     | -8.7     | -16.3    |
| <b>D<sub>c</sub></b>                    | -5.5     | -5.5     | -10.8    |
| <b>D<sub>d</sub></b>                    | -14.1    | -14.2    | -19.3    |
| <b>D<sub>e</sub></b>                    | -6.5     | -7.0     | -13.3    |
| <b>D<sub>f</sub></b>                    | -4.9     | -6.1     | -14.3    |
| <b>F</b>                                | 20.8     | 20.0     | 16.9     |

|                                             |      |      |      |
|---------------------------------------------|------|------|------|
| <b>F'</b>                                   | 12.2 | 13.2 | 11.9 |
| <b>(R)-TS(F-P)</b>                          | 40.6 | 39.9 | 36.4 |
| <b>(R)-TS(F-P)<sub>1w</sub></b>             | 26.7 | 26.6 | 24.2 |
| <b>(R)-TS(F'-P)<sub>2w</sub></b>            | 21.3 | 21.9 | 25.9 |
| <b>(R)-TS(F-P)<sub>3w</sub></b>             | 25.9 | 26.6 | 25.9 |
| <b>(R)-TS(D-P)</b>                          | 41.2 | 40.4 | 35.9 |
| <b>(R)-TS(D-P)<sub>1w</sub></b>             | 23.0 | 22.8 | 20.0 |
| <b>(R)-TS(D-P)<sub>2w</sub></b>             | 19.1 | 19.5 | 18.4 |
| <b>(R)-TS(D-P)<sub>3w</sub></b>             | 25.5 | 26.4 | 25.1 |
| <b>(R)-TS(D<sub>f</sub>-P)<sub>1w</sub></b> | 13.3 | 13.6 | 3.4  |
| <b>(R)-TS(D<sub>f</sub>-P)<sub>2w</sub></b> | 11.4 | 11.8 | 4.3  |
| <b>(R)-TS(D<sub>f</sub>-P)<sub>3w</sub></b> | 9.1  | 9.9  | 3.6  |
| <b>(S)-TS(D<sub>f</sub>-P)<sub>3w</sub></b> | 10.8 | 11.7 | 4.8  |
| <b>(R)-TS(D<sub>b</sub>-P)<sub>3w</sub></b> | 11.3 | 12.7 | 8.3  |
| <b>(R)-TS(D<sub>c</sub>-P)<sub>3w</sub></b> | 21.2 | 22.4 | 20.5 |
| <b>TS(A-E)</b>                              | 11.8 | 11.2 | 11.5 |
| <b>E</b>                                    | 11.8 | 10.8 | 9.8  |
| <b>TS(E-B)</b>                              | 12.8 | 13.2 | 8.5  |
| <b>TS(A-H)</b>                              | 34.6 | 33.7 | 45.0 |

X = SMD<sub>(chloroform)</sub>/UB3LYP-D3(BJ)/6-311++G(3df,3pd),SDD(Fe)//UB3LYP-D3(BJ)/6-31G(d,p),LANL2DZ(Fe), Y = relative free energies with Truhlar's type Quasi-Harmonic correction at 40°C at the X level of theory and Z = SMD<sub>(chloroform)</sub>/ωB97M-V/def2-QZVPP//B3LYP-D3(BJ)/6-31G(d,p),LANL2DZ(Fe).

**Table S7** Relative Free Energies ( $\Delta\Delta G$ ) (kcal/mol) for Fe/L1\* system for the **TS(D<sub>f</sub>-P)<sub>3w</sub>** at different level of theories<sup>a</sup>

| X                                              | $\Delta\Delta G^\ddagger$ |
|------------------------------------------------|---------------------------|
| <b>UB3LYP-D3(BJ)/6-311++G(d,p),SDD(Fe)</b>     | 3.9                       |
| <b>UB3LYP-D3(BJ)/6-311++G(3df,3pd),SDD(Fe)</b> | 4.1                       |
| <b>UB3LYP-D3(BJ)/def2-QZVPP</b>                | 0.9                       |
| <b>DLPNO-CCSD(T)/def2-TZVP</b>                 | 0.4                       |
| <b>ωB97M-V/def2-QZVPP</b>                      | 0.6                       |

$\Delta\Delta G^\ddagger = ((S)\text{-TS}(D_f\text{-P})_{3w} - (R)\text{-TS}(D_f\text{-P})_{3w})$ . <sup>a</sup>SMD<sub>(chloroform)</sub>/X//SMD<sub>(chloroform)</sub>/BS1.

**Table S8** Relative Free Energies ( $\Delta\Delta G$ ) (kcal/mol) for Fe/L2\* system for the **TS(Df-P)<sub>3w</sub>** at different level of theories<sup>a</sup>

| X                                              | $\Delta\Delta G^\ddagger$ |
|------------------------------------------------|---------------------------|
| <b>UB3LYP-D3(BJ)/6-311++G(d,p),SDD(Fe)</b>     | 0.0                       |
| <b>UB3LYP-D3(BJ)/6-311++G(3df,3pd),SDD(Fe)</b> | 0.0                       |
| <b>UB3LYP-D3(BJ)/def2-QZVPP</b>                | 0.0                       |
| <b>DLPNO-CCSD(T)/def2-TZVP</b>                 | -0.7                      |
| <b><math>\omega</math>B97M-V/def2-QZVPP</b>    | -0.6                      |

<sup>a</sup>SMD<sub>(chloroform)</sub>/X//BS1.

**Table S9** Relative Free Energies ( $\Delta\Delta G$ ) (kcal/mol) for Fe/L3\* system for the **TS(Df-P)<sub>3w</sub>** at different level of theories<sup>a</sup>

| X                                              | $\Delta\Delta G^\ddagger$ |
|------------------------------------------------|---------------------------|
| <b>UB3LYP-D3(BJ)/6-311++G(d,p),SDD(Fe)</b>     | 2.5                       |
| <b>UB3LYP-D3(BJ)/6-311++G(3df,3pd),SDD(Fe)</b> | 2.5                       |
| <b>UB3LYP-D3(BJ)/def2-QZVPP</b>                | 2.3                       |
| <b>DLPNO-CCSD(T)/def2-TZVP</b>                 | 2.6                       |
| <b><math>\omega</math>B97M-V/def2-QZVPP</b>    | 2.3                       |

<sup>a</sup>SMD<sub>(chloroform)</sub>/X//BS1.

**Table S10** Total Electronic Energies (a.u.) for Fe/L1\* system at the SMD<sub>(chloroform)</sub>/(U)B3LYP-D3(BJ)/6-311++G(d,p),SDD(Fe)//(U)B3LYP-D3(BJ)/6-31G(d,p),LANL2DZ(Fe)

|                | OSS            | CSS            | Triplet        | Quintet        |
|----------------|----------------|----------------|----------------|----------------|
| <b>A</b>       | -2468.55960002 | -2468.55438104 | -2468.58088298 | -2468.60857435 |
| <b>TS(A-B)</b> | -2584.33828495 | -2584.33402108 | -2584.356233   | -2584.38987754 |
| <b>B</b>       | -2584.34415141 | -2584.33801518 | -2584.3610567  | -2584.40748532 |

**Table S11** Total Electronic Energies (a.u.) for Fe/L1\* system at the SMD<sub>(chloroform)</sub>/UB3LYP-D3(BJ)/6-311++G(3df,3pd),SDD(Fe)//UB3LYP-D3(BJ)/6-31G(d,p),LANL2DZ(Fe) (**X**) and SMD<sub>(chloroform)</sub>/ $\omega$ B97M-V/def2-QZVPP//UB3LYP-D3(BJ)/6-31G(d,p),LANL2DZ(Fe) (**Y**) for the quintet spin state

|                            | X              | Y                 |
|----------------------------|----------------|-------------------|
| <b>A</b>                   | -2468.7483122  | -3607.71758412863 |
| <b>TS(A-B)</b>             | -2584.53666697 | -3723.45720163005 |
| <b>B</b>                   | -2584.55450885 | -3723.48103093735 |
| <b>TS(B-D<sub>a</sub>)</b> | -2584.54665749 | -3723.47397071063 |



|                                             |                |                   |
|---------------------------------------------|----------------|-------------------|
| <b>TS(B-D<sub>a</sub>)<sub>1w</sub></b>     | -2661.03391148 | -                 |
| <b>TS(B-C)</b>                              | -2584.53469863 | -3723.46504077925 |
| <b>(R)-TS(B-P)</b>                          | -2584.49364072 | -3723.4163200685  |
| <b>C</b>                                    | -2584.55780444 | -3723.48434290164 |
| <b>(R)-TS(C-P)<sub>1w</sub></b>             | -2661.00985609 | -3799.91490384779 |
| <b>(R)-TS(C-P)<sub>2w</sub></b>             | -2737.51663353 | -3876.39376348508 |
| <b>(R)-TS(C-P)<sub>3w</sub></b>             | -2814.00550946 | -3952.85599683064 |
| <b>D</b>                                    | -614.194583195 | -613.974870591267 |
| <b>D<sub>a</sub></b>                        | -2584.56875857 | -3723.49602620879 |
| <b>D<sub>b</sub></b>                        | -2584.57046795 | -3723.49982052688 |
| <b>D<sub>c</sub></b>                        | -2584.56626883 | -3723.49265120653 |
| <b>D<sub>d</sub></b>                        | -2584.57976031 | -3723.5058386356  |
| <b>D<sub>e</sub></b>                        | -2584.56862018 | -3723.49734538962 |
| <b>D<sub>f</sub></b>                        | -2584.56709013 | -3723.49993027354 |
| <b>F</b>                                    | -614.147038946 | -613.926626584258 |
| <b>F'</b>                                   | -767.138891884 | -766.862546043662 |
| <b>(R)-TS(F-P)</b>                          | -614.110335414 | -766.847097538285 |
| <b>(R)-TS(F-P)<sub>1w</sub></b>             | -690.62385288  | -690.37614750916  |
| <b>(R)-TS(F'-P)<sub>2w</sub></b>            | -767.122636023 | -766.847097538285 |
| <b>(R)-TS(F-P)<sub>3w</sub></b>             | -843.606916415 | -843.305084023709 |
| <b>(R)-TS(D-P)</b>                          | -614.109264854 | -613.891065254275 |
| <b>(R)-TS(D-P)<sub>1w</sub></b>             | -690.63179525  | -690.384902555946 |
| <b>(R)-TS(D-P)<sub>2w</sub></b>             | -767.127781784 | -766.852182817533 |
| <b>(R)-TS(D-P)<sub>3w</sub></b>             | -843.608824521 | -843.307684549364 |
| <b>(R)-TS(D<sub>f</sub>-P)<sub>2w</sub></b> | -2737.51923736 | -3876.39842472706 |
| <b>(R)-TS(D<sub>f</sub>-P)<sub>3w</sub></b> | -2814.01355823 | -3952.86499604591 |
| <b>(S)-TS(D<sub>f</sub>-P)<sub>3w</sub></b> | -2814.01182286 | -3952.86414221925 |
| <b>(R)-TS(D<sub>b</sub>-P)<sub>3w</sub></b> | -2814.00733213 | -3952.8547735699  |
| <b>(R)-TS(D<sub>c</sub>-P)<sub>3w</sub></b> | -2813.99068928 | -3952.83337989909 |
| <b>TS(A-E)</b>                              | -2584.53368232 | -3723.45202421803 |
| <b>E</b>                                    | -2584.53632179 | -3723.45740178544 |
| <b>TS(E-B)</b>                              | -2584.53258885 | -3723.45720618624 |

|                                 |                |                   |
|---------------------------------|----------------|-------------------|
| TS(A-H)                         | -2584.49319987 | -3723.39455679373 |
| (R)-TS(Df-P) <sub>3w</sub> -L3* | -3001.01559286 | -4139.8592477822  |
| (S)-TS(Df-P) <sub>3w</sub> -L3* | -3001.0107181  | -4139.85457273941 |
| (R)-TS(Df-P) <sub>3w</sub> -L2* | -2924.51433925 | -4063.38655919993 |
| (S)-TS(Df-P) <sub>3w</sub> -L2* | -2924.51425746 | -4063.38729615372 |

## References

- (1) (a) C. Lee, W. Yang and R. G. Parr, *Phys. Rev. B: Condens. Matter Mater. Phys.*, 1988, **37**, 785. (b) A. D. Becke *J. Chem. Phys.*, 1993, **98**, 5648. (c) R. Caballol, O. Castell, F. Illas, I. de P. R. Moreira and J. Malrieu, *J. Phys. Chem. A*, 1997, **101**, 7860.
- (2) Gaussian 16, Revision C.01, M. J. Frisch, G. W. Trucks, H. B. Schlegel, G. E. Scuseria, M. A. Robb, J. R. Cheeseman, G. Scalmani, V. Barone, G. A. Petersson, H. Nakatsuji, X. Li, M. Caricato, A. V. Marenich, J. Bloino, B. G. Janesko, R. Gomperts, B. Mennucci, H. P. Hratchian, J. V. Ortiz, A. F. Izmaylov, J. L. Sonnenberg, D. Williams-Young, F. Ding, F. Lipparini, F. Egidi, J. Goings, B. Peng, A. Petrone, T. Henderson, D. Ranasinghe, V. G. Zakrzewski, J. Gao, N. Rega, G. Zheng, W. Liang, M. Hada, M. Ehara, K. Toyota, R. Fukuda, J. Hasegawa, M. Ishida, T. Nakajima, Y. Honda, O. Kitao, H. Nakai, T. Vreven, K. Throssell, J. A. Montgomery, Jr., J. E. Peralta, F. Ogliaro, M. J. Bearpark, J. J. Heyd, E. N. Brothers, K. N. Kudin, V. N. Staroverov, T. A. Keith, R. Kobayashi, J. Normand, K. Raghavachari, A. P. Rendell, J. C. Burant, S. S. Iyengar, J. Tomasi, M. Cossi, J. M. Millam, M. Klene, C. Adamo, R. Cammi, J. W. Ochterski, R. L. Martin, K. Morokuma, O. Farkas, J. B. Foresman, D. J. Fox, Gaussian, Inc., Wallingford CT, **2016**.
- (3) (a) P. J. Hay and W. R. Wadt, *J. Chem. Phys.*, 1985, **82**, 299. (b) W. J. Hehre, R. Ditchfield and J. A. Pople, *J. Chem. Phys.*, 1972, **56**, 2257. (c) P. C. Hariharan and J. A. Pople, *Theor. Chim. Acta*, 1973, **28**, 213.
- (4) A. P. Scott and L. Radom, *J. Phys. Chem.*, 1996, **100**, 16502.
- (5) (a) K. Fukui *Acc. Chem. Res.*, 1981, **14**, 363. (b) H. P. Hratchian and H. B. Schlegel, *Theory and Applications of Computational Chemistry: The First 40 Years*, C. E. Dykstra, G. Frenking, K. S. Kim and G. Scuseria, Elsevier, Amsterdam, 2005, pp. 195.
- (6) A. V. Marenich, C. J. Cramer and D. G. Truhlar, *J. Phys. Chem. B*, 2009, **113**, 6378.

- (7) M. Dolg, U. Wedig, H. Stoll and H. Preuss, *J. Chem. Phys.*, 1987, **86**, 866.
- (8) M. J.Frisch, G. W.Trucks, H. B.Schlegel, G. E.Scuseria, M. A.Robb, J. R.Cheeseman, G.Scalmani, V.Barone, B.Mennucci, G. A.Petersson, H.Nakatsuji, M.Caricato, X.Li, H. P.Hratchian, A. F.Izmaylov, J.Bloino, G.Zheng, J. L.Sonnenberg, M.Hada, M.Ehara, K.Toyota, R.Fukuda, J.Hasegawa, M.Ishida, T.Nakajima, Y.Honda, O.Kitao, H.Nakai, T.Vreven, J. A.Montgomery Jr, J. E.Peralta, F.Ogliaro, M.Bearpark, J. J.Heyd, E.Brothers, K. N.Kudin, V. N.Staroverov, T.Keith, R.Kobayashi, J.Normand, K.Raghavachari, A.Rendell, J. C.Burant, S. S.Iyengar, J.Tomasi, M.Cossi, N.Regga, J. M.Millam, M.Klene, J. E.Knox, J. B.Cross, V.Bakken, C.Adamo, J.Jaramillo, R.Gomperts, R. E.Stratmann, O.Yazyev, A. J.Austin, R.Cammi, C.Pomelli, J. W.Ochterski, R. L.Martin, K.Morokuma, V. G.Zakrzewski, G. A.Voth, P.Salvador, J. J.Dannenberg, S.Dapprich, A. D.Daniels, O.Farkas, J. B.Foresman, J. V.Ortiz, J.Cioslowski, and D. J.Fox, Gaussian 09, Revision E.01, Gaussian, Inc., Wallingford CT, 2013.
- (9) (a) N. Mardirossian and M. H. Gordon, *Phys. Chem. Chem. Phys.*, 2014,**16**, 9904. (b) F. Weigend and R. Ahlrichs, *Phys. Chem. Chem. Phys.*, 2005,**7**, 3297.
- (10) (a) C. Riplinger and F. Neese, *J. Chem. Phys.* 2013, **138**, 034106. (b) C. Riplinger, B. Sandhoefer, A. Hansen and F. Neese, *J. Chem. Phys.* 2013, **139**, 134101.
- (11) G. Luchini, J. V. Alegre-Requena, I. Funes-Ardoiz and R. S. Paton, GoodVibes: Automated Thermochemistry for Heterogeneous Computational Chemistry Data. F1000Res. 2020, **9**, 291.
- (12) (a) T. Ziegler and A. Rauk, *Theor. Chim. Acta*, 1977, **46**, 1. (b) P. Su, H. Liu and W. Wu, *J. Chem. Phys.*, 2012, **137**, 034111. (c) P. Su, Z. Jiang, Z. Chen and W. Wu, *J. Phys. Chem. A*, 2014, **118**, 2531. (d) SCM. ADF; Theoretical Chemistry, Vrije Universiteit: Amsterdam, The Netherlands, 2014.
- (13) (a) AIMAll (Version 19.10.12), Todd A. Keith, TK Gristmill Software, Overland Park KS, USA, 2019. (b) R. F. W. Bader *Chem. Rev.*, 1991, **91**, 893.
- (14) Y. Cai, S.-F. Zhu, G.-P. Wang and Q.-L. Zhou, *Adv. Synth. Catal.*, 2011, **353**, 2939.

## Coordinates of optimized geometries

-----  
 A  
 -----

Number of imaginary frequencies: 0    Electronic energy:    HF=-2467.5398886

|                                              |                             |
|----------------------------------------------|-----------------------------|
| Zero-point correction=                       | 0.730978 (Hartree/Particle) |
| Thermal correction to Energy=                | 0.775585                    |
| Thermal correction to Enthalpy=              | 0.776529                    |
| Thermal correction to Gibbs Free Energy=     | 0.649239                    |
| Sum of electronic and zero-point Energies=   | -2466.808910                |
| Sum of electronic and thermal Energies=      | -2466.764304                |
| Sum of electronic and thermal Enthalpies=    | -2466.763360                |
| Sum of electronic and thermal Free Energies= | -2466.890650                |

.....  
Cartesian Coordinates  
.....

|   |           |           |           |
|---|-----------|-----------|-----------|
| C | 2.746151  | 1.266889  | -1.086313 |
| C | 1.696687  | 0.578197  | -1.712310 |
| C | 0.881960  | 1.259899  | -2.628681 |
| C | 1.092211  | 2.614426  | -2.889203 |
| C | 2.116568  | 3.309122  | -2.239260 |
| C | 2.941920  | 2.628862  | -1.344995 |
| H | 0.104473  | 0.715832  | -3.154089 |
| H | 2.278413  | 4.363065  | -2.445551 |
| C | 1.438162  | -0.859064 | -1.469829 |
| C | 3.789556  | 0.740026  | -0.114720 |
| C | 4.397731  | 2.052213  | 0.481801  |
| H | 5.458888  | 1.927061  | 0.707741  |
| H | 3.886256  | 2.305441  | 1.409680  |
| C | 4.133712  | 3.150377  | -0.575168 |
| O | 2.359928  | -1.712938 | -1.921059 |
| C | 0.541400  | -2.862946 | -0.925639 |
| N | 0.404549  | -1.378790 | -0.894143 |
| C | 3.245781  | -0.219903 | 0.928838  |
| C | 2.050770  | -0.136983 | 1.660661  |
| C | 1.687684  | -1.196077 | 2.507195  |
| C | 2.515090  | -2.311940 | 2.631257  |
| C | 3.712293  | -2.388431 | 1.914723  |
| C | 4.068592  | -1.342407 | 1.063068  |
| H | 0.756618  | -1.149328 | 3.057633  |
| H | 4.355539  | -3.257823 | 2.016112  |
| C | 1.127430  | 1.004290  | 1.532528  |
| C | 4.883617  | -0.123933 | -0.833726 |
| H | 5.722916  | 0.493922  | -1.160639 |
| H | 4.453621  | -0.597359 | -1.716671 |
| C | 5.291432  | -1.211767 | 0.185334  |
| O | 1.589860  | 2.225986  | 1.804081  |
| C | -0.725792 | 2.280515  | 1.310156  |
| H | -1.214511 | 2.527196  | 0.365168  |
| N | -0.121422 | 0.932259  | 1.193406  |
| C | 0.517119  | 3.173933  | 1.513715  |
| H | 0.808384  | 3.717388  | 0.611877  |
| H | 0.448724  | 3.857176  | 2.359478  |
| C | 1.947749  | -3.058630 | -1.531198 |
| H | 2.678475  | -3.419950 | -0.805722 |
| H | 1.971770  | -3.677560 | -2.428269 |
| H | 2.217996  | -3.122091 | 3.288447  |
| H | 4.986962  | 3.267535  | -1.254998 |
| H | 3.952667  | 4.131332  | -0.125742 |
| H | 6.150197  | -0.893920 | 0.789968  |
| H | 5.574514  | -2.152216 | -0.296383 |

|    |           |           |           |
|----|-----------|-----------|-----------|
| H  | 0.467849  | 3.124711  | -3.615596 |
| H  | 0.515307  | -3.217940 | 0.106623  |
| Fe | -1.053148 | -0.731170 | 0.435505  |
| Cl | -1.432429 | -2.428699 | 1.885816  |
| C  | -2.886198 | -0.129807 | -0.128886 |
| C  | -3.330008 | 0.865960  | -1.042728 |
| C  | -2.368042 | 1.609793  | -1.775038 |
| C  | -4.707514 | 1.160592  | -1.246183 |
| C  | -2.755201 | 2.595607  | -2.665925 |
| H  | -1.318990 | 1.394110  | -1.618605 |
| C  | -5.091933 | 2.146006  | -2.141021 |
| H  | -5.458366 | 0.612923  | -0.687474 |
| C  | -4.118701 | 2.862776  | -2.850253 |
| H  | -2.009873 | 3.161006  | -3.214687 |
| H  | -6.143253 | 2.365779  | -2.291856 |
| H  | -4.425639 | 3.635505  | -3.548362 |
| C  | -3.922898 | -0.776352 | 0.706013  |
| O  | -4.277396 | -0.233385 | 1.737279  |
| O  | -4.338545 | -1.950686 | 0.244561  |
| C  | -5.158718 | -2.729895 | 1.152880  |
| H  | -6.032337 | -2.155766 | 1.464426  |
| H  | -5.452980 | -3.611525 | 0.587411  |
| H  | -4.559593 | -3.005577 | 2.022502  |
| C  | -1.785291 | 2.317825  | 2.427503  |
| H  | -2.531614 | 1.559252  | 2.162160  |
| C  | -2.485545 | 3.681637  | 2.438136  |
| H  | -3.299091 | 3.685085  | 3.167999  |
| H  | -1.799125 | 4.491484  | 2.711992  |
| H  | -2.914035 | 3.918943  | 1.457992  |
| C  | -1.212713 | 1.950257  | 3.799682  |
| H  | -0.770779 | 0.950054  | 3.793716  |
| H  | -0.450116 | 2.663353  | 4.133456  |
| H  | -2.008584 | 1.950916  | 4.548855  |
| C  | -0.633064 | -3.502729 | -1.688486 |
| H  | -1.535854 | -3.208310 | -1.136281 |
| C  | -0.528193 | -5.030478 | -1.626315 |
| H  | -1.401108 | -5.493418 | -2.094196 |
| H  | 0.357602  | -5.397582 | -2.157739 |
| H  | -0.475081 | -5.381600 | -0.590989 |
| C  | -0.758791 | -2.986367 | -3.124749 |
| H  | -0.889149 | -1.900040 | -3.148309 |
| H  | 0.120020  | -3.237567 | -3.729539 |
| H  | -1.626724 | -3.436266 | -3.614443 |

---

**TS(A-B)**

---

Number of imaginary frequencies: 1    Electronic energy:    HF=-2583.2924669  
Zero-point correction=                    0.785102 (Hartree/Particle)  
Thermal correction to Energy=            0.832900  
Thermal correction to Enthalpy=         0.833844  
Thermal correction to Gibbs Free Energy= 0.700860  
Sum of electronic and zero-point Energies= -2582.507365  
Sum of electronic and thermal Energies= -2582.459567  
Sum of electronic and thermal Enthalpies= -2582.458623  
Sum of electronic and thermal Free Energies= -2582.591607

.....

Cartesian Coordinates

```

.....
C    -2.716576 -1.381830 -1.274648
C    -1.733375 -0.492387 -1.736544
C    -0.765635 -0.949414 -2.643328
C    -0.776600 -2.274238 -3.079654
C    -1.743140 -3.166460 -2.604888
C    -2.706035 -2.715042 -1.703237
H    -0.025598 -0.250776 -3.020113
H    -1.747471 -4.198416 -2.943571
C    -1.674051  0.910713 -1.283490
C    -3.850110 -1.135265 -0.289123
C    -4.272066 -2.587195  0.114366
H    -5.342845 -2.642901  0.322193
H    -3.739102 -2.887865  1.015145
C    -3.842781 -3.484341 -1.070165
O    -2.763864  1.653902 -1.490124
C    -1.055148  2.909100 -0.433577
N    -0.674346  1.489779 -0.705910
C    -3.471220 -0.242462  0.881966
C    -2.263562 -0.197874  1.595213
C    -2.062692  0.812498  2.548952
C    -3.074464  1.735202  2.813264
C    -4.290327  1.672822  2.124260
C    -4.474120  0.694551  1.147443
H    -1.115092  0.875445  3.070128
H    -5.074833  2.394158  2.334473
C    -1.203171 -1.199762  1.388496
C    -5.056658 -0.360833 -0.923065
H    -5.776727 -1.048774 -1.372150
H    -4.693790  0.305868 -1.705083
C    -5.655688  0.476761  0.230392
O    -1.553077 -2.479528  1.587479
C    0.754209 -2.285169  1.164395
H    1.325429 -2.433418  0.247027
N    0.034388 -0.989422  1.078573
C    -0.402505 -3.299333  1.237740
H    -0.620200 -3.768810  0.274622
H    -0.292800 -4.060331  2.009690
C    -2.542077  2.944706 -0.846060
H    -3.223338  2.999284  0.003765
H    -2.786307  3.716332 -1.575649
H    -2.909655  2.506493  3.558257
H    -4.655810 -3.604953 -1.797298
H    -3.551124 -4.490240 -0.753808
H    -6.444140 -0.074793  0.758115
H    -6.102036  1.412243 -0.118895
H    -0.038799 -2.608004 -3.802387
H    -0.948971  3.071202  0.641042
Fe    0.966096  0.771999  0.382476
Cl    1.203590  2.176135  2.157754
C    2.873405  0.144899  0.013626
C    3.431068 -0.764825 -0.933420
C    2.562208 -1.506686 -1.774518
C    4.831745 -0.969322 -1.065562
C    3.062108 -2.418807 -2.688814

```

|   |           |           |           |
|---|-----------|-----------|-----------|
| H | 1.494184  | -1.350088 | -1.686923 |
| C | 5.329501  | -1.883527 | -1.982180 |
| H | 5.515732  | -0.400551 | -0.444825 |
| C | 4.446523  | -2.609116 | -2.791551 |
| H | 2.386821  | -2.986133 | -3.320217 |
| H | 6.399405  | -2.036017 | -2.074366 |
| H | 4.839793  | -3.325088 | -3.506595 |
| C | 3.842676  | 0.884729  | 0.867286  |
| O | 4.313852  | 1.968739  | 0.547982  |
| O | 4.093162  | 0.256518  | 2.009791  |
| C | 4.805913  | 1.025040  | 3.014804  |
| H | 4.195686  | 1.883490  | 3.300010  |
| H | 4.937660  | 0.342496  | 3.851607  |
| H | 5.768206  | 1.357803  | 2.624312  |
| C | 1.735290  | -2.294255 | 2.351055  |
| H | 2.405655  | -1.442782 | 2.191995  |
| C | 2.582630  | -3.571419 | 2.321688  |
| H | 3.339574  | -3.546777 | 3.110223  |
| H | 1.974584  | -4.468841 | 2.484518  |
| H | 3.100435  | -3.685252 | 1.362632  |
| C | 1.040737  | -2.088778 | 3.700768  |
| H | 0.501126  | -1.138538 | 3.729282  |
| H | 0.334719  | -2.895150 | 3.928767  |
| H | 1.781475  | -2.069972 | 4.504907  |
| C | -0.143327 | 3.905159  | -1.168996 |
| H | 0.872437  | 3.689354  | -0.827234 |
| C | -0.496723 | 5.338063  | -0.753947 |
| H | 0.192924  | 6.050258  | -1.215464 |
| H | -1.509082 | 5.617856  | -1.068942 |
| H | -0.431668 | 5.463515  | 0.331594  |
| C | -0.172803 | 3.720886  | -2.688501 |
| H | 0.073048  | 2.692544  | -2.967907 |
| H | -1.151694 | 3.965108  | -3.116620 |
| H | 0.559565  | 4.379451  | -3.163735 |
| O | 2.537488  | 2.157070  | -1.444973 |
| C | 3.036146  | 1.958376  | -2.761747 |
| H | 3.382584  | 2.901880  | -3.198230 |
| H | 3.859681  | 1.233079  | -2.781444 |
| H | 2.214275  | 1.575019  | -3.369750 |
| H | 3.269969  | 2.428220  | -0.851375 |

-----  
**B**  
 -----

Number of imaginary frequencies: 0    Electronic energy:    HF=-2583.3112762  
 Zero-point correction=                    0.788017 (Hartree/Particle)  
 Thermal correction to Energy=            0.834385  
 Thermal correction to Enthalpy=         0.835329  
 Thermal correction to Gibbs Free Energy= 0.708609  
 Sum of electronic and zero-point Energies= -2582.523259  
 Sum of electronic and thermal Energies= -2582.476891  
 Sum of electronic and thermal Enthalpies= -2582.475947  
 Sum of electronic and thermal Free Energies= -2582.602668

-----  
 Cartesian Coordinates  
 -----

|   |          |           |          |
|---|----------|-----------|----------|
| C | 2.759979 | -0.541835 | 1.551174 |
|---|----------|-----------|----------|

|    |           |           |           |
|----|-----------|-----------|-----------|
| C  | 1.592871  | 0.235231  | 1.649499  |
| C  | 0.600510  | -0.123260 | 2.575781  |
| C  | 0.790891  | -1.217667 | 3.417747  |
| C  | 1.962852  | -1.977216 | 3.339369  |
| C  | 2.934345  | -1.643149 | 2.395792  |
| H  | -0.303381 | 0.469053  | 2.647435  |
| H  | 2.107178  | -2.829168 | 3.997768  |
| C  | 1.353180  | 1.400339  | 0.780434  |
| C  | 3.892564  | -0.444554 | 0.537400  |
| C  | 4.589604  | -1.841064 | 0.668926  |
| H  | 5.666007  | -1.761327 | 0.501952  |
| H  | 4.185367  | -2.527015 | -0.074264 |
| C  | 4.236535  | -2.345753 | 2.087838  |
| O  | 2.298520  | 2.345122  | 0.742535  |
| C  | 0.465781  | 2.920899  | -0.632614 |
| N  | 0.312397  | 1.601748  | 0.038487  |
| C  | 3.406988  | -0.119079 | -0.868454 |
| C  | 2.242787  | -0.558094 | -1.521373 |
| C  | 1.890327  | 0.006027  | -2.760082 |
| C  | 2.717405  | 0.955397  | -3.357919 |
| C  | 3.895539  | 1.366202  | -2.724595 |
| C  | 4.223061  | 0.840949  | -1.474398 |
| H  | 0.975031  | -0.306817 | -3.250576 |
| H  | 4.537273  | 2.106028  | -3.194493 |
| C  | 1.358037  | -1.581331 | -0.945835 |
| C  | 4.908232  | 0.713948  | 0.820044  |
| H  | 5.728004  | 0.373473  | 1.456460  |
| H  | 4.401436  | 1.530817  | 1.332328  |
| C  | 5.383746  | 1.191998  | -0.572103 |
| O  | 1.913629  | -2.727416 | -0.545685 |
| C  | -0.431343 | -2.824907 | -0.363289 |
| H  | -1.118779 | -2.673629 | 0.472419  |
| N  | 0.069351  | -1.501196 | -0.813881 |
| C  | 0.865900  | -3.511657 | 0.100797  |
| H  | 1.029726  | -3.438253 | 1.178040  |
| H  | 0.979221  | -4.542037 | -0.232421 |
| C  | 1.923052  | 3.295615  | -0.299818 |
| H  | 2.606045  | 3.139005  | -1.136108 |
| H  | 2.051973  | 4.296825  | 0.109481  |
| H  | 2.440263  | 1.374782  | -4.319207 |
| H  | 5.000625  | -2.051378 | 2.818428  |
| H  | 4.153927  | -3.435372 | 2.138317  |
| H  | 6.283775  | 0.653244  | -0.894496 |
| H  | 5.628879  | 2.257821  | -0.590044 |
| H  | 0.019309  | -1.472489 | 4.135656  |
| H  | 0.335436  | 2.765639  | -1.705105 |
| Fe | -1.026261 | 0.216541  | -0.730525 |
| Cl | -1.704070 | 1.244468  | -2.794088 |
| C  | -3.082348 | 0.302637  | -0.037772 |
| C  | -2.953193 | 0.396115  | 1.444855  |
| C  | -2.949647 | -0.747540 | 2.267635  |
| C  | -2.748871 | 1.647897  | 2.058666  |
| C  | -2.768807 | -0.631951 | 3.644806  |
| H  | -3.105202 | -1.722527 | 1.828824  |
| C  | -2.569090 | 1.753947  | 3.436308  |
| H  | -2.724043 | 2.544407  | 1.454187  |



|   |           |           |           |
|---|-----------|-----------|-----------|
| C | -2.577785 | 0.614595  | 4.242149  |
| H | -2.787313 | -1.529696 | 4.255464  |
| H | -2.420900 | 2.734571  | 3.877620  |
| H | -2.441067 | 0.697758  | 5.315048  |
| C | -3.932353 | -0.707307 | -0.719497 |
| O | -4.647230 | -0.456393 | -1.672822 |
| O | -3.793020 | -1.957187 | -0.222604 |
| C | -4.669455 | -2.939400 | -0.820943 |
| H | -4.398703 | -3.104311 | -1.865285 |
| H | -4.527871 | -3.846728 | -0.237708 |
| H | -5.705006 | -2.601329 | -0.768780 |
| C | -1.180197 | -3.544202 | -1.503159 |
| H | -2.009367 | -2.881321 | -1.773081 |
| C | -1.762250 | -4.867028 | -0.989988 |
| H | -2.420257 | -5.314536 | -1.739650 |
| H | -0.974322 | -5.597900 | -0.777291 |
| H | -2.340709 | -4.723871 | -0.071704 |
| C | -0.318546 | -3.754977 | -2.752733 |
| H | 0.040887  | -2.806172 | -3.159492 |
| H | 0.548542  | -4.393158 | -2.550646 |
| H | -0.906110 | -4.244426 | -3.534130 |
| C | -0.601451 | 3.919685  | -0.148621 |
| H | -1.562390 | 3.417746  | -0.314390 |
| C | -0.573220 | 5.181813  | -1.018136 |
| H | -1.361829 | 5.876931  | -0.716327 |
| H | 0.380141  | 5.714142  | -0.921849 |
| H | -0.720457 | 4.938702  | -2.075059 |
| C | -0.476662 | 4.250141  | 1.342840  |
| H | -0.459534 | 3.347548  | 1.958830  |
| H | 0.429739  | 4.826280  | 1.555952  |
| H | -1.324253 | 4.860923  | 1.668511  |
| O | -3.477326 | 1.634307  | -0.596343 |
| C | -4.859564 | 2.137337  | -0.465141 |
| H | -4.823382 | 3.170690  | -0.806751 |
| H | -5.514792 | 1.518803  | -1.071345 |
| H | -5.096198 | 2.084288  | 0.595246  |
| H | -3.096190 | 1.653837  | -1.551047 |

-----  
**TS(B-D)**  
 -----

Number of imaginary frequencies: 1    Electronic energy:    HF=-2583.3029539  
 Zero-point correction=                    0.786144 (Hartree/Particle)  
 Thermal correction to Energy=            0.832282  
 Thermal correction to Enthalpy=         0.833227  
 Thermal correction to Gibbs Free Energy= 0.706673  
 Sum of electronic and zero-point Energies= -2582.517249  
 Sum of electronic and thermal Energies= -2582.471111  
 Sum of electronic and thermal Enthalpies= -2582.470167  
 Sum of electronic and thermal Free Energies= -2582.596720

-----  
 Cartesian Coordinates  
 -----

|   |          |           |          |
|---|----------|-----------|----------|
| C | 2.835677 | -0.592271 | 1.486618 |
| C | 1.660423 | 0.163580  | 1.636442 |
| C | 0.707896 | -0.233723 | 2.588068 |
| C | 0.946575 | -1.332949 | 3.409854 |

|    |           |           |           |
|----|-----------|-----------|-----------|
| C  | 2.130195  | -2.067794 | 3.282385  |
| C  | 3.058004  | -1.703770 | 2.307547  |
| H  | -0.206815 | 0.333092  | 2.691656  |
| H  | 2.313467  | -2.926795 | 3.921616  |
| C  | 1.380096  | 1.355931  | 0.816241  |
| C  | 3.923072  | -0.471783 | 0.428865  |
| C  | 4.616389  | -1.873923 | 0.496702  |
| H  | 5.679815  | -1.801876 | 0.257809  |
| H  | 4.153746  | -2.547711 | -0.223858 |
| C  | 4.351653  | -2.388345 | 1.930253  |
| O  | 2.336051  | 2.290615  | 0.761307  |
| C  | 0.434645  | 2.956967  | -0.468662 |
| N  | 0.299195  | 1.608587  | 0.148729  |
| C  | 3.386675  | -0.112345 | -0.948616 |
| C  | 2.193449  | -0.524106 | -1.567148 |
| C  | 1.820197  | 0.050780  | -2.794535 |
| C  | 2.645076  | 0.991707  | -3.408511 |
| C  | 3.844443  | 1.383276  | -2.804613 |
| C  | 4.199656  | 0.840846  | -1.569661 |
| H  | 0.883184  | -0.234768 | -3.257752 |
| H  | 4.482974  | 2.118995  | -3.285319 |
| C  | 1.295452  | -1.522638 | -0.965280 |
| C  | 4.959237  | 0.670693  | 0.697802  |
| H  | 5.794597  | 0.312598  | 1.303840  |
| H  | 4.476588  | 1.485170  | 1.236754  |
| C  | 5.395432  | 1.161668  | -0.702319 |
| O  | 1.832921  | -2.682994 | -0.572058 |
| C  | -0.505099 | -2.715447 | -0.331333 |
| H  | -1.171900 | -2.544347 | 0.517591  |
| N  | 0.014097  | -1.407457 | -0.798082 |
| C  | 0.782841  | -3.430959 | 0.112060  |
| H  | 0.974338  | -3.346731 | 1.183609  |
| H  | 0.860291  | -4.469200 | -0.207727 |
| C  | 1.919173  | 3.285555  | -0.221582 |
| H  | 2.541163  | 3.141063  | -1.106800 |
| H  | 2.101445  | 4.268635  | 0.211157  |
| H  | 2.345462  | 1.422133  | -4.358076 |
| H  | 5.151048  | -2.084018 | 2.617898  |
| H  | 4.286333  | -3.478951 | 1.982115  |
| H  | 6.276215  | 0.614257  | -1.061429 |
| H  | 5.656397  | 2.223878  | -0.713626 |
| H  | 0.202523  | -1.612950 | 4.147606  |
| H  | 0.227880  | 2.856999  | -1.536805 |
| Fe | -1.054058 | 0.360430  | -0.800494 |
| Cl | -1.579571 | 1.130007  | -2.886342 |
| C  | -3.103737 | 0.386324  | 0.043695  |
| C  | -2.924658 | 0.208406  | 1.499201  |
| C  | -2.526344 | 1.300779  | 2.294260  |
| C  | -3.079567 | -1.044884 | 2.120689  |
| C  | -2.346325 | 1.159584  | 3.668412  |
| H  | -2.344930 | 2.261781  | 1.830415  |
| C  | -2.863890 | -1.184699 | 3.490862  |
| H  | -3.384146 | -1.901551 | 1.533751  |
| C  | -2.511436 | -0.086046 | 4.276884  |
| H  | -2.058403 | 2.023477  | 4.259333  |
| H  | -2.995652 | -2.159795 | 3.949698  |

|   |           |           |           |
|---|-----------|-----------|-----------|
| H | -2.366395 | -0.198424 | 5.346065  |
| C | -3.951879 | -0.431432 | -0.825064 |
| O | -4.569375 | 0.154233  | -1.739341 |
| O | -3.977075 | -1.744118 | -0.660731 |
| C | -4.774597 | -2.483140 | -1.625282 |
| H | -4.384146 | -2.319416 | -2.630494 |
| H | -4.678315 | -3.525217 | -1.330617 |
| H | -5.813274 | -2.155400 | -1.574949 |
| C | -1.286410 | -3.417773 | -1.460343 |
| H | -2.050097 | -2.699254 | -1.772706 |
| C | -1.987966 | -4.666312 | -0.914181 |
| H | -2.600717 | -5.135857 | -1.689067 |
| H | -1.267195 | -5.419840 | -0.577207 |
| H | -2.636373 | -4.422449 | -0.065593 |
| C | -0.422633 | -3.737539 | -2.685242 |
| H | 0.036400  | -2.836238 | -3.099848 |
| H | 0.372594  | -4.454188 | -2.454599 |
| H | -1.039542 | -4.181200 | -3.471599 |
| C | -0.581626 | 3.943808  | 0.135615  |
| H | -1.561699 | 3.468853  | -0.002860 |
| C | -0.580663 | 5.254753  | -0.659159 |
| H | -1.338341 | 5.942048  | -0.272188 |
| H | 0.386155  | 5.766341  | -0.587921 |
| H | -0.792969 | 5.076671  | -1.717899 |
| C | -0.358526 | 4.186250  | 1.632996  |
| H | -0.311614 | 3.249718  | 2.195795  |
| H | 0.569829  | 4.736133  | 1.819481  |
| H | -1.172849 | 4.788222  | 2.047657  |
| O | -3.595431 | 1.772044  | -0.350837 |
| C | -4.782113 | 2.288414  | 0.363747  |
| H | -5.074996 | 3.184802  | -0.180816 |
| H | -5.570826 | 1.535703  | 0.343494  |
| H | -4.489657 | 2.522812  | 1.381676  |
| H | -4.005875 | 1.410702  | -1.285834 |

-----  
**TS(B-D)<sub>1w</sub>**  
 -----

Number of imaginary frequencies: 1    Electronic energy:    HF=-2659.7599847  
 Zero-point correction=                    0.810346 (Hartree/Particle)  
 Thermal correction to Energy=            0.858503  
 Thermal correction to Enthalpy=         0.859447  
 Thermal correction to Gibbs Free Energy= 0.728658  
 Sum of electronic and zero-point Energies= -2658.949639  
 Sum of electronic and thermal Energies= -2658.901482  
 Sum of electronic and thermal Enthalpies= -2658.900538  
 Sum of electronic and thermal Free Energies= -2659.031327

.....  
 Cartesian Coordinates  
 .....

|   |          |           |          |
|---|----------|-----------|----------|
| C | 3.145988 | -0.691939 | 1.203370 |
| C | 1.941566 | -0.109349 | 1.629505 |
| C | 1.143532 | -0.796243 | 2.557212 |
| C | 1.548316 | -2.024599 | 3.072385 |
| C | 2.760012 | -2.593630 | 2.665647 |

|    |           |           |           |
|----|-----------|-----------|-----------|
| C  | 3.543799  | -1.929328 | 1.723644  |
| H  | 0.207636  | -0.355640 | 2.868695  |
| H  | 3.076335  | -3.552640 | 3.065905  |
| C  | 1.462477  | 1.194470  | 1.138968  |
| C  | 4.099839  | -0.227040 | 0.115773  |
| C  | 4.908522  | -1.529695 | -0.203011 |
| H  | 5.931078  | -1.296618 | -0.508346 |
| H  | 4.427405  | -2.068740 | -1.018777 |
| C  | 4.839896  | -2.376811 | 1.087916  |
| O  | 2.325138  | 2.218644  | 1.193394  |
| C  | 0.204900  | 2.946168  | 0.486437  |
| N  | 0.275952  | 1.473253  | 0.697774  |
| C  | 3.403879  | 0.368988  | -1.097307 |
| C  | 2.199988  | -0.021964 | -1.709487 |
| C  | 1.700271  | 0.733388  | -2.781890 |
| C  | 2.396184  | 1.850804  | -3.240878 |
| C  | 3.594414  | 2.237610  | -2.634043 |
| C  | 4.085840  | 1.499346  | -1.557607 |
| H  | 0.763029  | 0.452987  | -3.244024 |
| H  | 4.130808  | 3.112251  | -2.990941 |
| C  | 1.436664  | -1.200115 | -1.256804 |
| C  | 5.060548  | 0.926649  | 0.557304  |
| H  | 5.974058  | 0.531195  | 1.007532  |
| H  | 4.564142  | 1.554335  | 1.296588  |
| C  | 5.324211  | 1.746979  | -0.726497 |
| O  | 2.094513  | -2.363518 | -1.215548 |
| C  | -0.172811 | -2.653810 | -0.628601 |
| H  | -0.636437 | -2.706507 | 0.359190  |
| N  | 0.189709  | -1.239547 | -0.902434 |
| C  | 1.201634  | -3.351580 | -0.623854 |
| H  | 1.573308  | -3.560563 | 0.380905  |
| H  | 1.254945  | -4.248189 | -1.240407 |
| C  | 1.688038  | 3.346509  | 0.520480  |
| H  | 2.131857  | 3.418236  | -0.475335 |
| H  | 1.908975  | 4.241957  | 1.100195  |
| H  | 1.992863  | 2.422985  | -4.069400 |
| H  | 5.680816  | -2.154787 | 1.757336  |
| H  | 4.867292  | -3.452162 | 0.889614  |
| H  | 6.212071  | 1.382494  | -1.258817 |
| H  | 5.492466  | 2.808026  | -0.520081 |
| H  | 0.913831  | -2.540026 | 3.785568  |
| H  | -0.228244 | 3.130300  | -0.499318 |
| Fe | -1.040979 | 0.377820  | -0.506169 |
| Cl | -1.519236 | 1.623280  | -2.400812 |
| C  | -1.173678 | -3.176858 | -1.676797 |
| H  | -2.056916 | -2.538913 | -1.579659 |
| C  | -1.584490 | -4.616315 | -1.345412 |
| H  | -2.387952 | -4.947714 | -2.009395 |
| H  | -0.751987 | -5.316987 | -1.474825 |
| H  | -1.939902 | -4.702697 | -0.314289 |
| C  | -0.654163 | -3.046166 | -3.112501 |
| H  | -0.446971 | -2.003808 | -3.368976 |
| H  | 0.260152  | -3.628211 | -3.274146 |
| H  | -1.400875 | -3.419651 | -3.819406 |
| C  | -0.690671 | 3.596657  | 1.559824  |
| H  | -1.639194 | 3.049517  | 1.515603  |

|   |           |           |           |
|---|-----------|-----------|-----------|
| C | -0.962543 | 5.061834  | 1.200921  |
| H | -1.639389 | 5.520299  | 1.928252  |
| H | -0.040820 | 5.654507  | 1.202935  |
| H | -1.414892 | 5.146548  | 0.207622  |
| C | -0.139996 | 3.444427  | 2.982143  |
| H | 0.023591  | 2.394266  | 3.241690  |
| H | 0.807951  | 3.976308  | 3.114071  |
| H | -0.845635 | 3.859035  | 3.707933  |
| C | -3.115557 | 0.213965  | 0.305279  |
| C | -2.911690 | -0.928819 | 1.241592  |
| C | -2.301075 | -0.662781 | 2.484359  |
| C | -3.310424 | -2.252447 | 0.975684  |
| C | -2.095633 | -1.675249 | 3.419054  |
| H | -2.002816 | 0.354387  | 2.714739  |
| C | -3.084069 | -3.263467 | 1.908368  |
| H | -3.804391 | -2.488129 | 0.043867  |
| C | -2.474473 | -2.986899 | 3.133481  |
| H | -1.637918 | -1.435119 | 4.374296  |
| H | -3.411351 | -4.273518 | 1.681620  |
| H | -2.316026 | -3.776970 | 3.860022  |
| C | -3.921809 | 0.145862  | -0.912815 |
| O | -4.599479 | 1.086654  | -1.367202 |
| O | -3.791828 | -0.993418 | -1.600450 |
| C | -4.253809 | -0.966520 | -2.972874 |
| H | -3.704859 | -0.197919 | -3.519301 |
| H | -4.031039 | -1.958557 | -3.362154 |
| H | -5.324704 | -0.765728 | -3.009259 |
| C | -4.727243 | 1.364915  | 1.781024  |
| H | -5.543653 | 1.211577  | 1.072451  |
| H | -4.678039 | 0.549828  | 2.500937  |
| O | -3.459512 | 1.428480  | 1.062714  |
| H | -3.482977 | 2.453808  | 0.331778  |
| O | -3.651597 | 3.226305  | -0.515075 |
| H | -4.060964 | 2.509908  | -1.133791 |
| H | -4.336538 | 3.876460  | -0.298463 |
| H | -4.833483 | 2.316705  | 2.303962  |

---

**TS(B-C)**

---

Number of imaginary frequencies: 1    Electronic energy:    HF=-2583.2957598  
Zero-point correction=                    0.786270 (Hartree/Particle)  
Thermal correction to Energy=            0.832366  
Thermal correction to Enthalpy=         0.833310  
Thermal correction to Gibbs Free Energy= 0.706680  
Sum of electronic and zero-point Energies= -2582.509490  
Sum of electronic and thermal Energies= -2582.463394  
Sum of electronic and thermal Enthalpies= -2582.462450  
Sum of electronic and thermal Free Energies= -2582.589080

.....  
Cartesian Coordinates

.....  

|   |           |           |          |
|---|-----------|-----------|----------|
| C | 2.100497  | -1.649503 | 1.554092 |
| C | 1.475954  | -0.409454 | 1.764085 |
| C | 0.259155  | -0.363219 | 2.463614 |
| C | -0.312887 | -1.530654 | 2.969172 |
| C | 0.316242  | -2.763324 | 2.773273 |

|    |           |           |           |
|----|-----------|-----------|-----------|
| C  | 1.516835  | -2.815068 | 2.064061  |
| H  | -0.209837 | 0.599152  | 2.627039  |
| H  | -0.129887 | -3.672513 | 3.165527  |
| C  | 1.979780  | 0.845659  | 1.175452  |
| C  | 3.325653  | -1.967700 | 0.705833  |
| C  | 3.235222  | -3.523304 | 0.541088  |
| H  | 4.228573  | -3.976478 | 0.538743  |
| H  | 2.757748  | -3.765623 | -0.407503 |
| C  | 2.351721  | -4.023070 | 1.708812  |
| O  | 3.256902  | 1.168268  | 1.365751  |
| C  | 2.145785  | 2.757455  | -0.021681 |
| N  | 1.267114  | 1.652975  | 0.458282  |
| C  | 3.311393  | -1.197371 | -0.605996 |
| C  | 2.213187  | -0.931604 | -1.436418 |
| C  | 2.361268  | -0.039149 | -2.509621 |
| C  | 3.605403  | 0.537876  | -2.769678 |
| C  | 4.709384  | 0.243018  | -1.962387 |
| C  | 4.550913  | -0.610800 | -0.870892 |
| H  | 1.506684  | 0.194215  | -3.135078 |
| H  | 5.675458  | 0.692118  | -2.174635 |
| C  | 0.905424  | -1.589340 | -1.235798 |
| C  | 4.684706  | -1.525543 | 1.349556  |
| H  | 5.147834  | -2.350375 | 1.895305  |
| H  | 4.511848  | -0.714046 | 2.055652  |
| C  | 5.560335  | -1.014112 | 0.179038  |
| O  | 0.870179  | -2.913256 | -1.430604 |
| C  | -1.294634 | -2.050391 | -1.061942 |
| H  | -1.920933 | -2.008940 | -0.170800 |
| N  | -0.220967 | -1.028466 | -0.943630 |
| C  | -0.480859 | -3.357060 | -1.101722 |
| H  | -0.429246 | -3.856935 | -0.131125 |
| H  | -0.789706 | -4.062385 | -1.871648 |
| C  | 3.498160  | 2.419269  | 0.657228  |
| H  | 4.313479  | 2.244823  | -0.044540 |
| H  | 3.796633  | 3.151425  | 1.409060  |
| H  | 3.712520  | 1.216924  | -3.609228 |
| H  | 2.958762  | -4.317526 | 2.574217  |
| H  | 1.747097  | -4.893584 | 1.437480  |
| H  | 6.209387  | -1.807713 | -0.211758 |
| H  | 6.213843  | -0.189187 | 0.477330  |
| H  | -1.243054 | -1.474341 | 3.524826  |
| H  | 2.219567  | 2.648331  | -1.109531 |
| C  | -2.879288 | 0.963643  | 0.253672  |
| C  | -2.411730 | 1.662554  | 1.447103  |
| O  | -1.538452 | 2.546539  | 1.371404  |
| O  | -2.898775 | 1.242892  | 2.620701  |
| C  | -2.407589 | 1.909328  | 3.803112  |
| H  | -1.327726 | 1.786844  | 3.905758  |
| H  | -2.642713 | 2.973979  | 3.760594  |
| Fe | -0.522479 | 0.905838  | -0.289117 |
| Cl | -0.941373 | 1.939871  | -2.428698 |
| C  | -2.176661 | -1.783754 | -2.297897 |
| H  | -2.621627 | -0.795713 | -2.136494 |
| C  | -1.380143 | -1.734871 | -3.605244 |
| H  | -0.646399 | -0.925792 | -3.595425 |
| H  | -0.860646 | -2.678951 | -3.805238 |

|   |           |           |           |
|---|-----------|-----------|-----------|
| H | -2.054649 | -1.551797 | -4.446096 |
| C | -3.311615 | -2.812754 | -2.357130 |
| H | -3.863779 | -2.858747 | -1.415588 |
| H | -4.019914 | -2.548643 | -3.146919 |
| H | -2.933792 | -3.815970 | -2.586246 |
| C | 1.657714  | 4.180713  | 0.301054  |
| H | 1.525879  | 4.239811  | 1.390857  |
| C | 2.731711  | 5.194173  | -0.129593 |
| H | 2.397751  | 6.210911  | 0.092690  |
| H | 3.691840  | 5.051077  | 0.375365  |
| H | 2.905818  | 5.133270  | -1.210157 |
| C | 0.331812  | 4.521375  | -0.382149 |
| H | 0.425273  | 4.448085  | -1.469920 |
| H | -0.469873 | 3.860278  | -0.060720 |
| H | 0.043970  | 5.548307  | -0.135579 |
| C | -3.934327 | 3.182421  | -0.464522 |
| H | -4.174408 | 3.656723  | -1.415322 |
| H | -4.838646 | 2.886897  | 0.064959  |
| H | -3.290428 | 3.814297  | 0.146572  |
| O | -3.226165 | 1.948173  | -0.797785 |
| H | -2.926730 | 1.433434  | 4.633109  |
| C | -3.901520 | -0.102906 | 0.306523  |
| C | -4.995640 | -0.136186 | -0.573876 |
| C | -3.775921 | -1.146676 | 1.243575  |
| C | -5.945887 | -1.154908 | -0.495924 |
| H | -5.104033 | 0.630864  | -1.331334 |
| C | -4.727281 | -2.159226 | 1.318754  |
| H | -2.929087 | -1.155124 | 1.918620  |
| C | -5.824380 | -2.167889 | 0.453512  |
| H | -6.783952 | -1.153057 | -1.185824 |
| H | -4.610925 | -2.946880 | 2.057168  |
| H | -6.566194 | -2.957160 | 0.514138  |
| H | -2.453872 | 2.067749  | -1.492533 |

---

**TS(B-P)**

---

Number of imaginary frequencies: 1    Electronic energy:    HF=-2583.2537803  
Zero-point correction=                    0.781669 (Hartree/Particle)  
Thermal correction to Energy=            0.829299  
Thermal correction to Enthalpy=         0.830243  
Thermal correction to Gibbs Free Energy= 0.698908  
Sum of electronic and zero-point Energies= -2582.469095  
Sum of electronic and thermal Energies= -2582.421465  
Sum of electronic and thermal Enthalpies= -2582.420521  
Sum of electronic and thermal Free Energies= -2582.551856

.....  
Cartesian Coordinates

.....  

|   |          |           |          |
|---|----------|-----------|----------|
| C | 3.027093 | -1.183834 | 1.041136 |
| C | 2.034190 | -0.351354 | 1.582008 |
| C | 1.231556 | -0.826556 | 2.630420 |
| C | 1.447795 | -2.105367 | 3.147619 |
| C | 2.444076 | -2.931936 | 2.618420 |
| C | 3.220129 | -2.469868 | 1.556694 |
| H | 0.455800 | -0.190449 | 3.041969 |
| H | 2.609075 | -3.922974 | 3.031335 |

|   |           |           |           |
|---|-----------|-----------|-----------|
| C | 1.848472  | 1.039078  | 1.111635  |
| C | 3.950120  | -0.923275 | -0.140923 |
| C | 4.471065  | -2.357937 | -0.490713 |
| H | 5.497827  | -2.324519 | -0.861384 |
| H | 3.848884  | -2.796446 | -1.270275 |
| C | 4.326876  | -3.179875 | 0.811516  |
| O | 2.872200  | 1.869686  | 1.333218  |
| C | 1.074314  | 2.996924  | 0.280483  |
| N | 0.817056  | 1.547692  | 0.524254  |
| C | 3.261977  | -0.219163 | -1.300879 |
| C | 1.977042  | -0.436374 | -1.828155 |
| C | 1.492652  | 0.412519  | -2.836296 |
| C | 2.284732  | 1.453825  | -3.320600 |
| C | 3.567669  | 1.660529  | -2.808367 |
| C | 4.047904  | 0.824138  | -1.799249 |
| H | 0.499455  | 0.257100  | -3.241367 |
| H | 4.182608  | 2.471286  | -3.188202 |
| C | 1.074856  | -1.461402 | -1.275609 |
| C | 5.135124  | 0.046098  | 0.195745  |
| H | 6.017666  | -0.510059 | 0.519005  |
| H | 4.845596  | 0.712396  | 1.007237  |
| C | 5.380954  | 0.870325  | -1.089402 |
| O | 1.498734  | -2.720638 | -1.221209 |
| C | -0.679404 | -2.506985 | -0.300379 |
| H | -0.866278 | -2.386979 | 0.768495  |
| N | -0.110281 | -1.229437 | -0.798763 |
| C | 0.479783  | -3.504964 | -0.530723 |
| H | 0.928638  | -3.867542 | 0.394716  |
| H | 0.224191  | -4.342503 | -1.179748 |
| C | 2.548442  | 3.147978  | 0.711261  |
| H | 3.230284  | 3.278341  | -0.131377 |
| H | 2.720874  | 3.924546  | 1.455887  |
| H | 1.892360  | 2.103516  | -4.095202 |
| H | 5.249180  | -3.154285 | 1.405417  |
| H | 4.103402  | -4.233606 | 0.620480  |
| H | 6.151291  | 0.410045  | -1.720905 |
| H | 5.715820  | 1.889967  | -0.876922 |
| H | 0.849095  | -2.452222 | 3.983893  |
| H | 0.965146  | 3.174701  | -0.791429 |
| C | -2.805995 | 0.628422  | 0.620650  |
| O | -3.131467 | 2.239289  | 1.120212  |
| C | -4.145549 | 2.900420  | 0.335806  |
| H | -2.284917 | 1.766295  | 0.386607  |
| C | -2.370220 | 0.026373  | 1.919948  |
| O | -1.726817 | 0.606576  | 2.770697  |
| O | -2.718394 | -1.274298 | 1.998353  |
| C | -2.345124 | -1.959502 | 3.211716  |
| H | -2.578546 | -1.345123 | 4.081997  |
| H | -2.926609 | -2.880144 | 3.214260  |
| C | 0.066071  | 3.886970  | 1.029741  |
| H | -0.918907 | 3.624572  | 0.627391  |
| C | 0.045800  | 3.626690  | 2.538277  |
| H | -0.264030 | 2.603641  | 2.760318  |
| H | 1.023455  | 3.811285  | 2.998941  |
| H | -0.669287 | 4.297259  | 3.022885  |
| C | 0.324400  | 5.359866  | 0.690157  |



|    |           |           |           |
|----|-----------|-----------|-----------|
| H  | 0.310407  | 5.529822  | -0.391490 |
| H  | -0.444480 | 5.993513  | 1.140208  |
| H  | 1.290919  | 5.703384  | 1.076642  |
| C  | -2.007639 | -2.861758 | -0.987934 |
| H  | -2.697662 | -2.055656 | -0.731639 |
| C  | -1.893448 | -2.917248 | -2.513178 |
| H  | -1.227275 | -3.719567 | -2.850290 |
| H  | -2.875890 | -3.103224 | -2.955402 |
| H  | -1.520398 | -1.972584 | -2.919947 |
| C  | -2.578691 | -4.156087 | -0.398436 |
| H  | -2.681448 | -4.084397 | 0.689331  |
| H  | -3.569927 | -4.356020 | -0.813784 |
| H  | -1.949879 | -5.024880 | -0.624663 |
| H  | -1.277376 | -2.183712 | 3.198942  |
| C  | -3.958603 | 0.069792  | -0.112266 |
| C  | -5.080622 | -0.414254 | 0.588526  |
| C  | -3.969929 | 0.030675  | -1.516506 |
| C  | -6.168275 | -0.942127 | -0.097818 |
| H  | -5.094017 | -0.379238 | 1.671840  |
| C  | -5.056261 | -0.509749 | -2.201690 |
| H  | -3.128002 | 0.427022  | -2.070193 |
| C  | -6.155015 | -0.998764 | -1.495022 |
| H  | -7.027055 | -1.310666 | 0.453633  |
| H  | -5.045112 | -0.540741 | -3.286248 |
| H  | -7.002904 | -1.416857 | -2.028325 |
| H  | -4.165726 | 3.919208  | 0.727858  |
| H  | -3.881866 | 2.915846  | -0.724313 |
| H  | -5.114505 | 2.420579  | 0.482677  |
| Fe | -0.727647 | 0.705864  | -0.540877 |
| Cl | -1.357201 | 2.258907  | -2.088255 |

---

C

---

Number of imaginary frequencies: 0    Electronic energy:    HF=-2583.3162651  
Zero-point correction=                    0.786155 (Hartree/Particle)  
Thermal correction to Energy=            0.833474  
Thermal correction to Enthalpy=         0.834418  
Thermal correction to Gibbs Free Energy= 0.701089  
Sum of electronic and zero-point Energies= -2582.530110  
Sum of electronic and thermal Energies= -2582.482791  
Sum of electronic and thermal Enthalpies= -2582.481847  
Sum of electronic and thermal Free Energies= -2582.615176

.....  
Cartesian Coordinates

.....  

|   |           |           |           |
|---|-----------|-----------|-----------|
| C | -3.283589 | 0.710338  | -1.449400 |
| C | -1.905338 | 0.683090  | -1.714625 |
| C | -1.413376 | -0.217023 | -2.672147 |
| C | -2.281719 | -1.050847 | -3.375614 |
| C | -3.657488 | -1.005610 | -3.128538 |
| C | -4.148250 | -0.129835 | -2.161140 |
| H | -0.349604 | -0.248005 | -2.866964 |
| H | -4.333829 | -1.652685 | -3.679544 |
| C | -0.937560 | 1.507835  | -0.961992 |
| C | -4.026937 | 1.472006  | -0.361771 |
| C | -5.414889 | 0.745945  | -0.320270 |

|   |           |           |           |
|---|-----------|-----------|-----------|
| H | -6.220558 | 1.448897  | -0.098460 |
| H | -5.410073 | -0.012194 | 0.462508  |
| C | -5.573475 | 0.063944  | -1.698881 |
| O | -1.113951 | 2.830336  | -0.949729 |
| C | 0.775854  | 2.196079  | 0.345551  |
| N | 0.073589  | 1.055626  | -0.296181 |
| C | -3.290961 | 1.451889  | 0.969395  |
| C | -2.601061 | 0.387807  | 1.573095  |
| C | -1.887853 | 0.616119  | 2.759656  |
| C | -1.881780 | 1.883919  | 3.341634  |
| C | -2.580195 | 2.939777  | 2.748576  |
| C | -3.275979 | 2.718634  | 1.560128  |
| H | -1.338008 | -0.195597 | 3.220067  |
| H | -2.572525 | 3.924824  | 3.206317  |
| C | -2.562134 | -0.959748 | 0.969640  |
| C | -4.182679 | 3.003888  | -0.647823 |
| H | -5.126893 | 3.215610  | -1.154284 |
| H | -3.373676 | 3.341223  | -1.294702 |
| C | -4.069061 | 3.700649  | 0.729019  |
| O | -3.716131 | -1.615279 | 0.831749  |
| C | -1.893855 | -2.905917 | 0.023849  |
| H | -1.622383 | -2.929855 | -1.036718 |
| N | -1.504606 | -1.579841 | 0.556047  |
| C | -3.433495 | -2.887816 | 0.175094  |
| H | -3.958592 | -2.881468 | -0.780803 |
| H | -3.830179 | -3.676465 | 0.815014  |
| C | -0.080077 | 3.407528  | -0.090217 |
| H | -0.591530 | 3.895839  | 0.740006  |
| H | 0.458836  | 4.145065  | -0.685878 |
| H | -1.327186 | 2.044344  | 4.260038  |
| H | -6.106398 | 0.710750  | -2.407186 |
| H | -6.134590 | -0.873482 | -1.643196 |
| H | -5.056216 | 3.857820  | 1.181543  |
| H | -3.592347 | 4.683033  | 0.662391  |
| H | -1.885412 | -1.731323 | -4.122474 |
| H | 0.706285  | 2.046783  | 1.426586  |
| C | 3.935745  | -0.957475 | -0.096985 |
| O | 3.719702  | -1.443154 | 1.248425  |
| C | 2.930101  | -1.279953 | -0.976917 |
| O | 1.794888  | -1.831151 | -0.633793 |
| O | 3.171866  | -1.022316 | -2.281299 |
| C | 2.136864  | -1.213606 | -3.246918 |
| H | 1.409637  | -1.950339 | -2.906047 |
| H | 1.644720  | -0.256807 | -3.449657 |
| C | -1.148178 | -4.041830 | 0.748921  |
| H | -0.081722 | -3.872674 | 0.540467  |
| C | -1.347446 | -4.002547 | 2.267279  |
| H | -0.997376 | -3.057624 | 2.691713  |
| H | -2.399328 | -4.136440 | 2.544094  |
| H | -0.785157 | -4.811082 | 2.742451  |
| C | -1.534911 | -5.397637 | 0.146508  |
| H | -1.374749 | -5.417816 | -0.936754 |
| H | -0.936991 | -6.198567 | 0.589180  |
| H | -2.587208 | -5.636983 | 0.337288  |
| C | 2.263916  | 2.230209  | -0.041890 |
| H | 2.670242  | 1.267212  | 0.284598  |

|    |          |           |           |
|----|----------|-----------|-----------|
| C  | 2.491238 | 2.343038  | -1.551122 |
| H  | 1.949158 | 1.564407  | -2.094800 |
| H  | 2.172539 | 3.315878  | -1.942291 |
| H  | 3.553687 | 2.225837  | -1.777257 |
| C  | 3.003528 | 3.324709  | 0.733726  |
| H  | 2.852196 | 3.218754  | 1.813021  |
| H  | 4.077307 | 3.262393  | 0.537957  |
| H  | 2.669431 | 4.326823  | 0.439602  |
| Fe | 0.397879 | -0.881349 | 0.326050  |
| Cl | 1.351690 | -0.589678 | 2.527962  |
| H  | 2.627531 | -1.559854 | -4.157184 |
| C  | 3.895255 | -2.881412 | 1.459073  |
| H  | 3.174159 | -3.415608 | 0.841201  |
| H  | 4.921508 | -3.108283 | 1.179162  |
| H  | 3.723849 | -3.054249 | 2.520989  |
| C  | 5.129612 | -0.128891 | -0.226324 |
| C  | 5.652239 | 0.253487  | -1.479371 |
| C  | 5.760872 | 0.366295  | 0.933615  |
| C  | 6.745454 | 1.112479  | -1.557095 |
| H  | 5.201735 | -0.125000 | -2.385315 |
| C  | 6.856442 | 1.220856  | 0.842541  |
| H  | 5.385569 | 0.089675  | 1.911783  |
| C  | 7.354383 | 1.605796  | -0.402299 |
| H  | 7.129390 | 1.390208  | -2.534077 |
| H  | 7.319863 | 1.588249  | 1.753066  |
| H  | 8.207605 | 2.272452  | -0.471568 |
| H  | 2.864517 | -1.089082 | 1.733780  |

---

**TS(C-P)<sub>1w</sub>**

---

Number of imaginary frequencies: 1    Electronic energy:    HF=-2659.728481  
Zero-point correction=                    0.808619 (Hartree/Particle)  
Thermal correction to Energy=            0.857952  
Thermal correction to Enthalpy=        0.858896  
Thermal correction to Gibbs Free Energy= 0.721128  
Sum of electronic and zero-point Energies= -2658.919862  
Sum of electronic and thermal Energies= -2658.870529  
Sum of electronic and thermal Enthalpies= -2658.869585  
Sum of electronic and thermal Free Energies= -2659.007353

.....  
Cartesian Coordinates

.....

|   |           |           |           |
|---|-----------|-----------|-----------|
| C | -2.502661 | -0.878739 | -1.983610 |
| C | -1.273853 | -0.253546 | -1.722867 |
| C | -0.086112 | -0.976681 | -1.910729 |
| C | -0.123920 | -2.279063 | -2.404553 |
| C | -1.346928 | -2.890459 | -2.700647 |
| C | -2.530071 | -2.191130 | -2.470462 |
| H | 0.856481  | -0.520599 | -1.640520 |
| H | -1.373290 | -3.906462 | -3.083932 |
| C | -1.174319 | 1.120645  | -1.194508 |
| C | -3.905244 | -0.378200 | -1.674155 |
| C | -4.755391 | -1.692006 | -1.736370 |
| H | -5.762593 | -1.494415 | -2.109582 |
| H | -4.844862 | -2.116876 | -0.736796 |
| C | -3.956403 | -2.661209 | -2.637757 |

|    |           |           |           |
|----|-----------|-----------|-----------|
| O  | -1.781265 | 2.098277  | -1.877833 |
| C  | -0.597675 | 2.953323  | -0.011632 |
| N  | -0.519638 | 1.480418  | -0.141836 |
| C  | -3.989282 | 0.342683  | -0.336675 |
| C  | -3.353143 | 0.024277  | 0.875037  |
| C  | -3.473159 | 0.901594  | 1.963365  |
| C  | -4.237101 | 2.063205  | 1.847807  |
| C  | -4.885591 | 2.370639  | 0.648306  |
| C  | -4.749118 | 1.511447  | -0.441866 |
| H  | -2.954373 | 0.683371  | 2.888608  |
| H  | -5.479626 | 3.276250  | 0.564000  |
| C  | -2.511653 | -1.181404 | 1.024075  |
| C  | -4.436917 | 0.697952  | -2.679056 |
| H  | -4.982013 | 0.233441  | -3.503986 |
| H  | -3.598587 | 1.251983  | -3.100559 |
| C  | -5.315191 | 1.652408  | -1.836351 |
| O  | -3.093422 | -2.372655 | 0.829082  |
| C  | -0.789508 | -2.604029 | 1.351881  |
| H  | -0.050623 | -2.716420 | 0.550989  |
| N  | -1.256706 | -1.202605 | 1.322275  |
| C  | -2.071250 | -3.397629 | 1.002643  |
| H  | -1.995707 | -3.944801 | 0.062084  |
| H  | -2.412523 | -4.064867 | 1.795451  |
| C  | -1.622876 | 3.328438  | -1.104347 |
| H  | -2.604121 | 3.578472  | -0.696882 |
| H  | -1.291936 | 4.105146  | -1.793728 |
| H  | -4.319373 | 2.730257  | 2.699372  |
| H  | -4.257004 | -2.569999 | -3.689332 |
| H  | -4.094933 | -3.709462 | -2.357684 |
| H  | -6.367301 | 1.340649  | -1.845702 |
| H  | -5.287389 | 2.682008  | -2.205176 |
| H  | 0.802422  | -2.822925 | -2.559167 |
| H  | -0.987894 | 3.180816  | 0.983887  |
| C  | -0.112936 | -2.948016 | 2.691093  |
| H  | 0.758571  | -2.281653 | 2.758861  |
| C  | 0.399991  | -4.392675 | 2.667388  |
| H  | 0.971345  | -4.613366 | 3.572849  |
| H  | -0.425250 | -5.112425 | 2.621512  |
| H  | 1.051876  | -4.575410 | 1.805263  |
| C  | -1.014003 | -2.668061 | 3.897333  |
| H  | -1.925468 | -3.276410 | 3.875452  |
| H  | -0.487481 | -2.907931 | 4.825162  |
| H  | -1.301036 | -1.614178 | 3.940091  |
| C  | 0.804116  | 3.580072  | -0.141698 |
| H  | 1.403403  | 3.122243  | 0.656588  |
| C  | 1.479008  | 3.252984  | -1.477670 |
| H  | 0.950175  | 3.703495  | -2.324775 |
| H  | 2.501476  | 3.642118  | -1.490450 |
| H  | 1.521339  | 2.172899  | -1.646467 |
| C  | 0.744113  | 5.088577  | 0.119719  |
| H  | 0.293780  | 5.304793  | 1.093518  |
| H  | 1.747667  | 5.522736  | 0.108593  |
| H  | 0.157496  | 5.606349  | -0.647816 |
| Fe | 0.080832  | 0.367652  | 1.501182  |
| Cl | -0.357217 | 1.514577  | 3.417434  |
| C  | 3.805287  | -0.294935 | -0.366021 |

|   |          |           |           |
|---|----------|-----------|-----------|
| C | 3.061696 | 0.178597  | 0.733932  |
| O | 3.640207 | 1.146012  | 1.456698  |
| C | 3.058113 | 1.513180  | 2.724317  |
| H | 2.170375 | 2.131522  | 2.587609  |
| H | 2.789088 | 0.626115  | 3.299381  |
| H | 3.832857 | 2.080801  | 3.237688  |
| C | 3.150235 | -2.656633 | -0.501158 |
| H | 4.179309 | -2.937791 | -0.267513 |
| H | 2.536302 | -2.644061 | 0.400674  |
| O | 3.125357 | -1.337630 | -1.085393 |
| H | 3.433979 | 0.634114  | -1.854626 |
| C | 5.263975 | -0.238219 | -0.607531 |
| C | 5.831439 | -1.064169 | -1.604629 |
| C | 6.122289 | 0.668219  | 0.048571  |
| C | 7.189430 | -0.996504 | -1.917798 |
| H | 5.219421 | -1.797922 | -2.119398 |
| C | 7.476042 | 0.725433  | -0.270412 |
| H | 5.724649 | 1.327001  | 0.806429  |
| C | 8.023433 | -0.099769 | -1.254759 |
| H | 7.592232 | -1.657593 | -2.679291 |
| H | 8.110317 | 1.430406  | 0.258414  |
| H | 9.079305 | -0.045084 | -1.497021 |
| O | 1.902408 | -0.265317 | 1.022998  |
| O | 3.215279 | 0.248923  | -2.809076 |
| H | 3.092979 | -0.725406 | -2.348487 |
| H | 4.065079 | 0.254816  | -3.286741 |
| H | 2.729243 | -3.341639 | -1.238060 |

-----  
**TS(C-P)<sub>2w</sub>**  
 -----

Number of imaginary frequencies: 1    Electronic energy:    HF=-2736.2031161  
 Zero-point correction=                    0.833999 (Hartree/Particle)  
 Thermal correction to Energy=            0.885105  
 Thermal correction to Enthalpy=         0.886049  
 Thermal correction to Gibbs Free Energy= 0.746670  
 Sum of electronic and zero-point Energies= -2735.369117  
 Sum of electronic and thermal Energies= -2735.318011  
 Sum of electronic and thermal Enthalpies= -2735.317067  
 Sum of electronic and thermal Free Energies= -2735.456446

.....  
 Cartesian Coordinates  
 .....

|   |           |           |           |
|---|-----------|-----------|-----------|
| C | -3.444296 | -0.943265 | -1.388865 |
| C | -2.224851 | -0.327218 | -1.711398 |
| C | -1.265190 | -1.046973 | -2.437265 |
| C | -1.531980 | -2.347555 | -2.863146 |
| C | -2.753419 | -2.956362 | -2.556816 |
| C | -3.697500 | -2.253513 | -1.810063 |
| H | -0.309862 | -0.583356 | -2.645738 |
| H | -2.957350 | -3.970479 | -2.888247 |
| C | -1.898691 | 1.043831  | -1.271224 |
| C | -4.568905 | -0.422645 | -0.506161 |
| C | -5.374802 | -1.724637 | -0.177490 |
| H | -6.442620 | -1.514548 | -0.084669 |
| H | -5.030860 | -2.139566 | 0.769188  |
| C | -5.052505 | -2.712668 | -1.322750 |

|   |           |           |           |
|---|-----------|-----------|-----------|
| O | -2.741872 | 2.017109  | -1.645638 |
| C | -0.949130 | 2.867648  | -0.349931 |
| N | -0.876700 | 1.405067  | -0.572404 |
| C | -4.066424 | 0.318771  | 0.724237  |
| C | -2.972929 | 0.010230  | 1.550724  |
| C | -2.611098 | 0.901558  | 2.570770  |
| C | -3.343677 | 2.071489  | 2.773515  |
| C | -4.441333 | 2.371788  | 1.961572  |
| C | -4.791185 | 1.495811  | 0.934337  |
| H | -1.748127 | 0.686861  | 3.188301  |
| H | -5.009043 | 3.283642  | 2.124259  |
| C | -2.163939 | -1.207384 | 1.336472  |
| C | -5.477551 | 0.645604  | -1.203563 |
| H | -6.327498 | 0.174930  | -1.702976 |
| H | -4.901710 | 1.182334  | -1.956687 |
| C | -5.901979 | 1.623389  | -0.082905 |
| O | -2.804900 | -2.383766 | 1.417525  |
| C | -0.522535 | -2.673890 | 0.850815  |
| H | -0.251368 | -2.777718 | -0.204813 |
| N | -0.906117 | -1.259794 | 1.060148  |
| C | -1.836882 | -3.434643 | 1.140017  |
| H | -2.203564 | -4.001010 | 0.283170  |
| H | -1.794507 | -4.078534 | 2.020398  |
| C | -2.270504 | 3.259794  | -1.050261 |
| H | -3.037316 | 3.597298  | -0.351560 |
| H | -2.158383 | 3.985205  | -1.857869 |
| H | -3.050235 | 2.750511  | 3.567172  |
| H | -5.785166 | -2.636194 | -2.136250 |
| H | -5.054576 | -3.755534 | -0.992155 |
| H | -6.856876 | 1.324812  | 0.368054  |
| H | -6.031103 | 2.647123  | -0.446798 |
| H | -0.787430 | -2.888853 | -3.438157 |
| H | -1.022171 | 3.029364  | 0.728539  |
| C | 3.836128  | -0.197979 | -0.164713 |
| O | 3.323697  | 0.381873  | 1.030518  |
| H | 3.303705  | 1.973706  | 1.142735  |
| C | 2.841395  | -0.772428 | -0.953946 |
| O | 1.574462  | -0.662350 | -0.747276 |
| O | 3.246704  | -1.422386 | -2.067517 |
| C | 2.243274  | -1.846950 | -2.994497 |
| H | 1.474217  | -2.440815 | -2.497777 |
| H | 1.775727  | -0.987975 | -3.486675 |
| O | 3.432258  | 2.928220  | 0.811404  |
| H | 3.820345  | 1.294476  | -1.260939 |
| H | 3.650013  | 2.750377  | -0.350982 |
| O | 3.779764  | 2.293884  | -1.468155 |
| C | 0.695296  | -3.071718 | 1.700837  |
| H | 1.520866  | -2.458292 | 1.318388  |
| C | 0.510968  | -2.752445 | 3.186991  |
| H | 0.322895  | -1.686503 | 3.343375  |
| H | -0.323279 | -3.313653 | 3.622724  |
| H | 1.409443  | -3.024537 | 3.748792  |
| C | 1.059603  | -4.540737 | 1.458177  |
| H | 1.197150  | -4.748979 | 0.391505  |
| H | 1.989770  | -4.797194 | 1.972665  |
| H | 0.284091  | -5.216140 | 1.836553  |

|    |           |           |           |
|----|-----------|-----------|-----------|
| C  | 0.325817  | 3.571657  | -0.845649 |
| H  | 1.129218  | 3.181831  | -0.209778 |
| C  | 0.650716  | 3.239724  | -2.306755 |
| H  | 0.803391  | 2.162814  | -2.445522 |
| H  | -0.152126 | 3.539552  | -2.988992 |
| H  | 1.542209  | 3.786777  | -2.640157 |
| C  | 0.238774  | 5.081711  | -0.601030 |
| H  | 0.018878  | 5.296665  | 0.449114  |
| H  | 1.184760  | 5.570744  | -0.851731 |
| H  | -0.539473 | 5.548717  | -1.214875 |
| Fe | 0.465112  | 0.256286  | 0.587892  |
| Cl | 0.765170  | 1.613470  | 2.423626  |
| H  | 2.770796  | -2.448331 | -3.734111 |
| C  | 3.541645  | -0.404891 | 2.227699  |
| H  | 3.179218  | -1.421470 | 2.061291  |
| H  | 4.605630  | -0.432016 | 2.472316  |
| H  | 2.962208  | 0.077319  | 3.013485  |
| C  | 5.300293  | -0.371157 | -0.232402 |
| C  | 5.932911  | -1.379508 | -0.983265 |
| C  | 6.119751  | 0.521949  | 0.487123  |
| C  | 7.322209  | -1.476714 | -1.013003 |
| H  | 5.334482  | -2.086559 | -1.540711 |
| C  | 7.507115  | 0.414298  | 0.461883  |
| H  | 5.661626  | 1.310491  | 1.075544  |
| C  | 8.119324  | -0.586207 | -0.292970 |
| H  | 7.784598  | -2.265621 | -1.598423 |
| H  | 8.110126  | 1.115458  | 1.030749  |
| H  | 9.200594  | -0.671861 | -0.317407 |
| H  | 2.997277  | 2.458498  | -2.018802 |
| H  | 4.135940  | 3.359634  | 1.315956  |

-----  
**TS(C-P)<sub>3w</sub>**  
 -----

Number of imaginary frequencies: 1    Electronic energy:    HF=-2812.6589068  
 Zero-point correction=                    0.858853 (Hartree/Particle)  
 Thermal correction to Energy=            0.912190  
 Thermal correction to Enthalpy=         0.913134  
 Thermal correction to Gibbs Free Energy= 0.769589  
 Sum of electronic and zero-point Energies= -2811.800053  
 Sum of electronic and thermal Energies= -2811.746717  
 Sum of electronic and thermal Enthalpies= -2811.745772  
 Sum of electronic and thermal Free Energies= -2811.889318

-----  
 Cartesian Coordinates  
 -----

|   |           |           |           |
|---|-----------|-----------|-----------|
| C | -3.469241 | -0.634598 | -1.553607 |
| C | -2.160749 | -0.161813 | -1.748303 |
| C | -1.245097 | -0.955189 | -2.455162 |
| C | -1.635333 | -2.181936 | -2.987588 |
| C | -2.942590 | -2.645953 | -2.809378 |
| C | -3.847169 | -1.874663 | -2.082025 |
| H | -0.226415 | -0.606837 | -2.562288 |
| H | -3.244136 | -3.604066 | -3.222818 |
| C | -1.697138 | 1.124354  | -1.196989 |
| C | -4.589725 | -0.034992 | -0.716959 |
| C | -5.554909 | -1.252679 | -0.521616 |
| H | -6.595873 | -0.926799 | -0.464599 |
| H | -5.311600 | -1.766785 | 0.407673  |

|   |           |           |           |
|---|-----------|-----------|-----------|
| C | -5.279585 | -2.190682 | -1.718557 |
| O | -2.435726 | 2.207085  | -1.482238 |
| C | -0.543532 | 2.774659  | -0.189722 |
| N | -0.637347 | 1.324477  | -0.483711 |
| C | -4.113434 | 0.579447  | 0.589932  |
| C | -3.117203 | 0.120279  | 1.466954  |
| C | -2.772902 | 0.900316  | 2.580366  |
| C | -3.427698 | 2.108076  | 2.821799  |
| C | -4.428061 | 2.559574  | 1.955423  |
| C | -4.757467 | 1.795950  | 0.836140  |
| H | -1.986985 | 0.565309  | 3.244833  |
| H | -4.935616 | 3.500493  | 2.148538  |
| C | -2.417556 | -1.162119 | 1.240520  |
| C | -5.331078 | 1.159238  | -1.406195 |
| H | -6.171235 | 0.807721  | -2.009591 |
| H | -4.642953 | 1.688673  | -2.064306 |
| C | -5.765629 | 2.091517  | -0.251049 |
| O | -3.184027 | -2.264982 | 1.230816  |
| C | -0.903361 | -2.790494 | 0.870528  |
| H | -0.463744 | -2.923348 | -0.121715 |
| N | -1.156171 | -1.342411 | 1.049786  |
| C | -2.324071 | -3.396805 | 0.918890  |
| H | -2.649468 | -3.798578 | -0.042354 |
| H | -2.468195 | -4.142448 | 1.701758  |
| C | -1.883124 | 3.321083  | -0.724679 |
| H | -2.591924 | 3.552524  | 0.072396  |
| H | -1.795198 | 4.168948  | -1.404898 |
| H | -3.151462 | 2.697601  | 3.689714  |
| H | -5.937772 | -1.962508 | -2.566655 |
| H | -5.433495 | -3.245413 | -1.472640 |
| H | -6.776551 | 1.848173  | 0.099893  |
| H | -5.778641 | 3.145353  | -0.544842 |
| H | -0.921180 | -2.779218 | -3.544840 |
| H | -0.486987 | 2.888817  | 0.894579  |
| C | 3.613669  | -0.494913 | -0.219382 |
| O | 3.080825  | 0.031047  | 0.999058  |
| H | 3.235651  | 1.671600  | 1.437523  |
| C | 2.635837  | -1.234765 | -0.907342 |
| O | 1.387139  | -1.202997 | -0.616175 |
| O | 3.031629  | -1.919436 | -1.992702 |
| C | 2.026905  | -2.506339 | -2.829879 |
| H | 1.284605  | -3.042193 | -2.237183 |
| H | 1.529796  | -1.738086 | -3.429847 |
| O | 3.271109  | 2.639240  | 1.627994  |
| H | 3.576207  | 0.784452  | -1.283537 |
| O | 3.628238  | 1.657192  | -1.899728 |
| C | 0.095799  | -3.316327 | 1.917028  |
| H | 1.024635  | -2.758933 | 1.735601  |
| C | -0.349770 | -3.036857 | 3.355123  |
| H | -0.479704 | -1.965099 | 3.528088  |
| H | -1.293119 | -3.540914 | 3.593735  |
| H | 0.399511  | -3.402999 | 4.062689  |
| C | 0.390553  | -4.800579 | 1.674046  |
| H | 0.724432  | -4.980010 | 0.646157  |
| H | 1.174944  | -5.153495 | 2.349088  |
| H | -0.494271 | -5.421515 | 1.854085  |
| C | 0.734102  | 3.371414  | -0.804954 |
| H | 1.557823  | 2.790811  | -0.372221 |
| C | 0.777953  | 3.224759  | -2.329858 |
| H | 0.677716  | 2.176075  | -2.635497 |



|    |           |           |           |
|----|-----------|-----------|-----------|
| H  | -0.032208 | 3.774534  | -2.819135 |
| H  | 1.709834  | 3.631614  | -2.739031 |
| C  | 0.918185  | 4.827046  | -0.365259 |
| H  | 0.923455  | 4.913671  | 0.725709  |
| H  | 1.864047  | 5.230452  | -0.740452 |
| H  | 0.121412  | 5.472120  | -0.750637 |
| Fe | 0.470735  | -0.041046 | 0.718419  |
| Cl | 0.617759  | 1.227250  | 2.673056  |
| H  | 2.562467  | -3.191223 | -3.486034 |
| C  | 3.370601  | -0.794359 | 2.158714  |
| H  | 3.034648  | -1.818174 | 1.968667  |
| H  | 4.443548  | -0.792273 | 2.357746  |
| H  | 2.816017  | -0.359279 | 2.988592  |
| C  | 5.088641  | -0.651623 | -0.263966 |
| C  | 5.742394  | -1.699289 | -0.934312 |
| C  | 5.879066  | 0.318114  | 0.383808  |
| C  | 7.134389  | -1.766538 | -0.956265 |
| H  | 5.162408  | -2.460971 | -1.437388 |
| C  | 7.268763  | 0.238606  | 0.367980  |
| H  | 5.405058  | 1.138484  | 0.912602  |
| C  | 7.906107  | -0.803242 | -0.306584 |
| H  | 7.617351  | -2.586882 | -1.478479 |
| H  | 7.853085  | 0.996259  | 0.880856  |
| H  | 8.989366  | -0.864097 | -0.324057 |
| H  | 2.757157  | 1.802607  | -2.297151 |
| H  | 2.430713  | 2.803893  | 2.083607  |
| H  | 3.953427  | 2.573677  | -1.283900 |
| O  | 4.297125  | 3.483899  | -0.485744 |
| H  | 3.848227  | 3.314424  | 0.422296  |
| H  | 4.235062  | 4.408899  | -0.749661 |

-----  
**D**  
-----

Number of imaginary frequencies: 0    Electronic energy:    HF=-613.9663991  
Zero-point correction=                    0.204667 (Hartree/Particle)  
Thermal correction to Energy=            0.217456  
Thermal correction to Enthalpy=         0.218400  
Thermal correction to Gibbs Free Energy= 0.164793  
Sum of electronic and zero-point Energies= -613.761732  
Sum of electronic and thermal Energies= -613.748943  
Sum of electronic and thermal Enthalpies= -613.747999  
Sum of electronic and thermal Free Energies= -613.801606

.....  
Cartesian Coordinates  
.....

|   |           |           |           |
|---|-----------|-----------|-----------|
| C | -0.810794 | 0.042725  | -0.055649 |
| C | -1.144303 | -1.205995 | 0.505042  |
| C | -2.464452 | -1.648190 | 0.511747  |
| C | -3.485876 | -0.859350 | -0.021838 |
| C | -3.168123 | 0.383212  | -0.571949 |
| C | -1.849310 | 0.829076  | -0.591728 |
| H | -0.364803 | -1.821654 | 0.934717  |
| H | -2.698332 | -2.615079 | 0.948658  |
| H | -4.514170 | -1.207556 | -0.006919 |
| H | -3.950031 | 1.007856  | -0.994769 |
| H | -1.603103 | 1.785607  | -1.039316 |
| C | 0.557089  | 0.556353  | -0.099232 |
| C | 1.728415  | -0.116596 | 0.011891  |

|   |           |           |           |
|---|-----------|-----------|-----------|
| O | 2.920178  | 0.512282  | -0.136599 |
| O | 1.814356  | -1.430590 | 0.278621  |
| C | 2.872263  | -2.148797 | -0.374188 |
| H | 2.745051  | -3.189139 | -0.074700 |
| H | 2.784609  | -2.063108 | -1.462618 |
| H | 3.850980  | -1.783180 | -0.056683 |
| O | 0.736381  | 1.928476  | -0.351460 |
| H | 2.682578  | 1.414933  | -0.416057 |
| C | 0.455360  | 2.748368  | 0.789819  |
| H | 1.122874  | 2.499132  | 1.624024  |
| H | -0.582979 | 2.622367  | 1.113825  |
| H | 0.618388  | 3.783646  | 0.481856  |

---

**D<sub>a</sub>**

---

Number of imaginary frequencies: 0    Electronic energy:    HF=-2583.3305337  
Zero-point correction=                    0.787951 (Hartree/Particle)  
Thermal correction to Energy=            0.834878  
Thermal correction to Enthalpy=        0.835822  
Thermal correction to Gibbs Free Energy= 0.707212  
Sum of electronic and zero-point Energies= -2582.542583  
Sum of electronic and thermal Energies= -2582.495656  
Sum of electronic and thermal Enthalpies= -2582.494711  
Sum of electronic and thermal Free Energies= -2582.623322

.....  
Cartesian Coordinates

.....

|   |           |           |           |
|---|-----------|-----------|-----------|
| C | 2.835147  | -0.850088 | 1.330346  |
| C | 1.691781  | -0.075666 | 1.592081  |
| C | 0.730413  | -0.553687 | 2.497003  |
| C | 0.930886  | -1.759896 | 3.164976  |
| C | 2.082892  | -2.517180 | 2.928586  |
| C | 3.019610  | -2.064996 | 1.999928  |
| H | -0.162147 | 0.028974  | 2.684275  |
| H | 2.236549  | -3.457591 | 3.450302  |
| C | 1.442314  | 1.213783  | 0.927373  |
| C | 3.914287  | -0.637989 | 0.278445  |
| C | 4.563963  | -2.059251 | 0.169784  |
| H | 5.628440  | -1.990722 | -0.064988 |
| H | 4.080090  | -2.624119 | -0.626699 |
| C | 4.286595  | -2.740838 | 1.528992  |
| O | 2.426701  | 2.116161  | 0.948765  |
| C | 0.501530  | 3.006219  | -0.080676 |
| N | 0.348312  | 1.583845  | 0.335744  |
| C | 3.373111  | -0.113558 | -1.043053 |
| C | 2.171684  | -0.437765 | -1.696189 |
| C | 1.817823  | 0.250690  | -2.867363 |
| C | 2.662921  | 1.230565  | -3.387459 |
| C | 3.864611  | 1.544653  | -2.745132 |
| C | 4.206898  | 0.878203  | -1.568663 |
| H | 0.883171  | 0.020887  | -3.363570 |
| H | 4.518123  | 2.310426  | -3.153154 |
| C | 1.257825  | -1.469724 | -1.169358 |
| C | 4.986830  | 0.436867  | 0.658398  |
| H | 5.821317  | -0.012481 | 1.201485  |
| H | 4.537859  | 1.194555  | 1.299359  |

|    |           |           |           |
|----|-----------|-----------|-----------|
| C  | 5.415484  | 1.077704  | -0.682725 |
| O  | 1.757071  | -2.698852 | -1.012351 |
| C  | -0.520753 | -2.615413 | -0.379884 |
| H  | -0.896190 | -2.486078 | 0.639129  |
| N  | 0.017226  | -1.311311 | -0.832164 |
| C  | 0.731360  | -3.518973 | -0.380929 |
| H  | 1.084587  | -3.761294 | 0.622430  |
| H  | 0.630827  | -4.427615 | -0.974584 |
| C  | 2.014369  | 3.229031  | 0.097622  |
| H  | 2.574528  | 3.140952  | -0.835572 |
| H  | 2.279605  | 4.150202  | 0.614523  |
| H  | 2.377264  | 1.750673  | -4.295580 |
| H  | 5.097827  | -2.552853 | 2.243791  |
| H  | 4.184197  | -3.826546 | 1.443872  |
| H  | 6.283111  | 0.561751  | -1.113174 |
| H  | 5.694757  | 2.129920  | -0.575451 |
| H  | 0.181789  | -2.104411 | 3.868949  |
| H  | 0.215701  | 3.085791  | -1.132812 |
| Fe | -1.019292 | 0.469275  | -0.700404 |
| Cl | -1.500744 | 1.238404  | -2.842603 |
| C  | -3.204533 | 0.580303  | 0.116294  |
| C  | -2.944750 | 0.097259  | 1.491902  |
| C  | -2.590917 | 1.038434  | 2.479059  |
| C  | -3.015487 | -1.260649 | 1.865338  |
| C  | -2.355027 | 0.643370  | 3.794255  |
| H  | -2.503759 | 2.081638  | 2.208081  |
| C  | -2.765303 | -1.647823 | 3.179440  |
| H  | -3.296521 | -2.006437 | 1.135417  |
| C  | -2.442443 | -0.702047 | 4.155264  |
| H  | -2.101166 | 1.392639  | 4.537601  |
| H  | -2.838909 | -2.698135 | 3.444892  |
| H  | -2.265763 | -1.008403 | 5.181054  |
| C  | -3.991185 | -0.054868 | -0.848019 |
| O  | -4.286895 | 0.497812  | -2.010877 |
| O  | -4.508461 | -1.254166 | -0.633701 |
| C  | -5.154434 | -1.933360 | -1.739364 |
| H  | -4.468523 | -2.022808 | -2.583316 |
| H  | -5.415812 | -2.913211 | -1.344883 |
| H  | -6.049015 | -1.389408 | -2.043474 |
| C  | -1.678412 | -3.075238 | -1.282998 |
| H  | -2.436246 | -2.290063 | -1.197470 |
| C  | -2.289782 | -4.374831 | -0.747955 |
| H  | -3.173059 | -4.653639 | -1.329435 |
| H  | -1.585154 | -5.211093 | -0.815410 |
| H  | -2.592578 | -4.276376 | 0.300201  |
| C  | -1.277404 | -3.181905 | -2.757321 |
| H  | -0.926192 | -2.221086 | -3.142686 |
| H  | -0.490185 | -3.927350 | -2.915210 |
| H  | -2.135044 | -3.489930 | -3.362582 |
| C  | -0.409905 | 3.925909  | 0.754276  |
| H  | -1.421505 | 3.537930  | 0.599805  |
| C  | -0.355553 | 5.357651  | 0.208369  |
| H  | -1.059733 | 5.999737  | 0.744942  |
| H  | 0.639653  | 5.800877  | 0.328624  |
| H  | -0.612680 | 5.389726  | -0.855454 |
| C  | -0.097417 | 3.873302  | 2.253952  |

|   |           |          |           |
|---|-----------|----------|-----------|
| H | -0.164063 | 2.854259 | 2.645226  |
| H | 0.902811  | 4.259172 | 2.478738  |
| H | -0.810474 | 4.489637 | 2.809421  |
| O | -3.034781 | 1.960837 | -0.092816 |
| C | -4.209634 | 2.764094 | 0.136812  |
| H | -3.886689 | 3.803579 | 0.067730  |
| H | -4.966313 | 2.563996 | -0.627054 |
| H | -4.620174 | 2.564708 | 1.131253  |
| H | -3.544279 | 1.089777 | -2.299441 |

---

**D<sub>b</sub>**

---

Number of imaginary frequencies: 0    Electronic energy:    HF=-2583.3256158  
 Zero-point correction=                    0.787934 (Hartree/Particle)  
 Thermal correction to Energy=            0.835248  
 Thermal correction to Enthalpy=         0.836192  
 Thermal correction to Gibbs Free Energy= 0.703937  
 Sum of electronic and zero-point Energies= -2582.537682  
 Sum of electronic and thermal Energies= -2582.490368  
 Sum of electronic and thermal Enthalpies= -2582.489423  
 Sum of electronic and thermal Free Energies= -2582.621679

.....  
 Cartesian Coordinates

.....  

|   |           |           |           |
|---|-----------|-----------|-----------|
| C | -1.584446 | -1.783002 | -1.710817 |
| C | -0.868005 | -0.575150 | -1.726160 |
| C | 0.509039  | -0.595278 | -1.998019 |
| C | 1.152485  | -1.801355 | -2.277525 |
| C | 0.433622  | -3.000739 | -2.289203 |
| C | -0.930238 | -2.985261 | -1.996916 |
| H | 1.068028  | 0.332156  | -2.020093 |
| H | 0.937729  | -3.937404 | -2.509753 |
| C | -1.509330 | 0.720572  | -1.424328 |
| C | -3.028775 | -2.025107 | -1.294247 |
| C | -3.066761 | -3.574902 | -1.071208 |
| H | -4.033724 | -3.991350 | -1.361324 |
| H | -2.910366 | -3.797928 | -0.016163 |
| C | -1.891442 | -4.147058 | -1.898679 |
| O | -2.499382 | 1.124835  | -2.225263 |
| C | -2.056811 | 2.730019  | -0.536969 |
| N | -1.199416 | 1.521823  | -0.456968 |
| C | -3.413359 | -1.213439 | -0.065905 |
| C | -2.653510 | -0.962926 | 1.088142  |
| C | -3.127638 | -0.042507 | 2.039372  |
| C | -4.357910 | 0.589210  | 1.852532  |
| C | -5.127300 | 0.317264  | 0.717322  |
| C | -4.646044 | -0.576987 | -0.239976 |
| H | -2.536298 | 0.173462  | 2.923216  |
| H | -6.086297 | 0.808058  | 0.577839  |
| C | -1.314397 | -1.543758 | 1.296087  |
| C | -4.082302 | -1.561832 | -2.357992 |
| H | -4.372619 | -2.388515 | -3.009737 |
| H | -3.653505 | -0.780039 | -2.984188 |
| C | -5.271793 | -0.986018 | -1.553052 |
| O | -1.162974 | -2.867700 | 1.275221  |
| C | 0.877984  | -1.776771 | 1.785909  |

|    |           |           |           |
|----|-----------|-----------|-----------|
| H  | 1.712851  | -1.513392 | 1.134164  |
| N  | -0.243250 | -0.848967 | 1.511658  |
| C  | 0.272298  | -3.138237 | 1.383219  |
| H  | 0.604655  | -3.479884 | 0.401707  |
| H  | 0.398232  | -3.927254 | 2.123354  |
| C  | -3.031140 | 2.370962  | -1.681399 |
| H  | -4.043119 | 2.163127  | -1.330443 |
| H  | -3.058347 | 3.095232  | -2.495475 |
| H  | -4.713955 | 1.291662  | 2.598685  |
| H  | -2.216603 | -4.446258 | -2.903091 |
| H  | -1.443477 | -5.030663 | -1.434850 |
| H  | -6.041299 | -1.747477 | -1.374436 |
| H  | -5.763977 | -0.155270 | -2.067412 |
| H  | 2.217985  | -1.800247 | -2.481760 |
| H  | -2.594719 | 2.821408  | 0.411199  |
| Fe | -0.218240 | 1.182887  | 1.319373  |
| Cl | -0.467217 | 2.398617  | 3.175047  |
| C  | 3.358744  | 1.057529  | -0.706913 |
| C  | 2.750798  | 1.219795  | 0.482892  |
| O  | 1.638152  | 2.050870  | 0.568999  |
| O  | 3.021959  | 0.571892  | 1.619347  |
| C  | 3.323441  | 1.423289  | 2.760023  |
| H  | 2.435973  | 1.984069  | 3.061099  |
| H  | 3.629786  | 0.744265  | 3.554090  |
| H  | 4.142768  | 2.101403  | 2.505176  |
| C  | 1.333189  | -1.653573 | 3.252908  |
| H  | 1.543139  | -0.589087 | 3.401526  |
| C  | 2.635282  | -2.434091 | 3.461446  |
| H  | 3.002561  | -2.305276 | 4.483470  |
| H  | 2.491446  | -3.509482 | 3.303938  |
| H  | 3.413255  | -2.091985 | 2.771168  |
| C  | 0.245805  | -2.053032 | 4.255298  |
| H  | -0.664968 | -1.463816 | 4.115650  |
| H  | -0.015079 | -3.114477 | 4.182725  |
| H  | 0.594810  | -1.875919 | 5.276097  |
| C  | -1.203651 | 3.997640  | -0.735703 |
| H  | -0.534884 | 4.039588  | 0.135603  |
| C  | -2.090897 | 5.247017  | -0.698658 |
| H  | -1.481894 | 6.152725  | -0.760005 |
| H  | -2.791449 | 5.268019  | -1.541341 |
| H  | -2.670928 | 5.295228  | 0.228163  |
| C  | -0.347335 | 3.944600  | -2.006681 |
| H  | 0.283430  | 3.050019  | -2.046738 |
| H  | -0.963991 | 3.948158  | -2.912103 |
| H  | 0.304410  | 4.821301  | -2.060244 |
| O  | 2.729279  | 1.757339  | -1.743576 |
| C  | 3.537008  | 2.801524  | -2.325658 |
| H  | 2.923901  | 3.263458  | -3.099903 |
| H  | 3.807437  | 3.542265  | -1.565650 |
| H  | 4.444898  | 2.384837  | -2.767895 |
| H  | 1.526217  | 2.420445  | -0.329854 |
| C  | 4.452379  | 0.140208  | -1.044579 |
| C  | 4.573643  | -0.307650 | -2.372685 |
| C  | 5.368393  | -0.327918 | -0.086730 |
| C  | 5.577263  | -1.205878 | -2.729545 |
| H  | 3.870120  | 0.045422  | -3.118960 |

|   |          |           |           |
|---|----------|-----------|-----------|
| C | 6.366834 | -1.227378 | -0.450307 |
| H | 5.297760 | 0.013398  | 0.938168  |
| C | 6.477109 | -1.671080 | -1.770048 |
| H | 5.656005 | -1.540706 | -3.759131 |
| H | 7.068971 | -1.577055 | 0.300026  |
| H | 7.261060 | -2.367841 | -2.048155 |

-----  
**D<sub>c</sub>**  
 -----

Number of imaginary frequencies: 0    Electronic energy:    HF=-2583.3208071  
 Zero-point correction=                    0.788397 (Hartree/Particle)  
 Thermal correction to Energy=            0.835559  
 Thermal correction to Enthalpy=         0.836503  
 Thermal correction to Gibbs Free Energy= 0.705495  
 Sum of electronic and zero-point Energies= -2582.532410  
 Sum of electronic and thermal Energies= -2582.485248  
 Sum of electronic and thermal Enthalpies= -2582.484304  
 Sum of electronic and thermal Free Energies= -2582.615312

.....  
 Cartesian Coordinates  
 .....

|   |           |           |           |
|---|-----------|-----------|-----------|
| C | -3.250467 | -0.725542 | 1.390222  |
| C | -1.876619 | -0.786952 | 1.677317  |
| C | -1.372764 | -0.072323 | 2.774414  |
| C | -2.225126 | 0.679192  | 3.580974  |
| C | -3.594052 | 0.737345  | 3.299075  |
| C | -4.096542 | 0.040052  | 2.201330  |
| H | -0.313592 | -0.123040 | 2.988563  |
| H | -4.257133 | 1.324374  | 3.928005  |
| C | -0.930285 | -1.550555 | 0.843251  |
| C | -4.013154 | -1.324004 | 0.217611  |
| C | -5.356395 | -0.519403 | 0.236680  |
| H | -6.191826 | -1.139139 | -0.096238 |
| H | -5.283373 | 0.334210  | -0.436086 |
| C | -5.518014 | -0.021951 | 1.691734  |
| O | -1.197769 | -2.841893 | 0.641871  |
| C | 0.806702  | -2.212334 | -0.448538 |
| N | 0.145093  | -1.094858 | 0.282161  |
| C | -3.260741 | -1.238471 | -1.100962 |
| C | -2.451294 | -0.197778 | -1.585173 |
| C | -1.735846 | -0.381627 | -2.779829 |
| C | -1.855766 | -1.574720 | -3.491836 |
| C | -2.679676 | -2.602260 | -3.021526 |
| C | -3.366303 | -2.433236 | -1.819286 |
| H | -1.082082 | 0.402889  | -3.140538 |
| H | -2.769731 | -3.529440 | -3.580350 |
| C | -2.322818 | 1.088381  | -0.875775 |
| C | -4.279330 | -2.861261 | 0.356466  |
| H | -5.222556 | -3.054293 | 0.872487  |
| H | -3.479153 | -3.321883 | 0.935082  |
| C | -4.256225 | -3.412357 | -1.088361 |
| O | -3.452863 | 1.762393  | -0.632478 |
| C | -1.564873 | 3.003561  | 0.035542  |
| H | -1.109445 | 3.120679  | 1.021918  |
| N | -1.226741 | 1.657473  | -0.484032 |
| C | -3.098664 | 2.929260  | 0.165725  |

|    |           |           |           |
|----|-----------|-----------|-----------|
| H  | -3.431069 | 2.733370  | 1.187706  |
| H  | -3.632334 | 3.784041  | -0.247900 |
| C  | -0.225006 | -3.351902 | -0.320621 |
| H  | -0.766551 | -3.545408 | -1.247674 |
| H  | 0.175672  | -4.280687 | 0.084568  |
| H  | -1.300821 | -1.699682 | -4.415577 |
| H  | -6.097521 | -0.731613 | 2.295717  |
| H  | -6.034151 | 0.940589  | 1.753355  |
| H  | -5.259316 | -3.410214 | -1.533398 |
| H  | -3.889305 | -4.441582 | -1.139553 |
| H  | -1.823512 | 1.215266  | 4.435053  |
| H  | 0.914455  | -1.904496 | -1.491722 |
| Fe | 0.645752  | 0.773818  | -0.406027 |
| Cl | 1.581689  | 0.722489  | -2.457865 |
| C  | -1.027750 | 4.101080  | -0.906097 |
| H  | 0.052240  | 3.921212  | -0.992341 |
| C  | -1.237055 | 5.485005  | -0.280592 |
| H  | -0.784019 | 6.260379  | -0.903765 |
| H  | -2.301646 | 5.726829  | -0.185309 |
| H  | -0.788852 | 5.550714  | 0.717178  |
| C  | -1.614360 | 4.011285  | -2.318850 |
| H  | -1.398327 | 3.044115  | -2.779816 |
| H  | -2.699058 | 4.164082  | -2.323153 |
| H  | -1.175476 | 4.783783  | -2.955702 |
| C  | 2.205421  | -2.497407 | 0.121414  |
| H  | 2.750583  | -1.550823 | 0.046809  |
| C  | 2.930432  | -3.521802 | -0.757682 |
| H  | 3.949729  | -3.679897 | -0.396751 |
| H  | 2.428261  | -4.496205 | -0.745936 |
| H  | 2.989652  | -3.181756 | -1.796385 |
| C  | 2.172562  | -2.918239 | 1.592566  |
| H  | 1.657061  | -2.175917 | 2.207937  |
| H  | 1.676535  | -3.885076 | 1.732428  |
| H  | 3.191036  | -3.014325 | 1.975941  |
| C  | 2.735500  | 2.060264  | 0.378568  |
| C  | 3.544040  | 0.977037  | 0.821599  |
| C  | 1.677747  | 2.542979  | 1.164734  |
| H  | 2.972247  | 2.535266  | -0.564754 |
| C  | 3.225153  | 0.395906  | 2.070609  |
| C  | 1.367515  | 1.935127  | 2.388931  |
| H  | 1.139587  | 3.425648  | 0.838334  |
| C  | 2.155827  | 0.865139  | 2.827014  |
| H  | 3.826881  | -0.420367 | 2.444226  |
| H  | 0.550466  | 2.308512  | 2.995723  |
| H  | 1.945949  | 0.397622  | 3.784633  |
| C  | 4.634778  | 0.539403  | -0.019609 |
| C  | 5.404782  | -0.585825 | 0.091476  |
| O  | 4.932386  | 1.290185  | -1.162260 |
| O  | 6.326754  | -0.878567 | -0.835232 |
| H  | 6.196613  | -0.218409 | -1.543457 |
| O  | 5.283929  | -1.471878 | 1.083198  |
| C  | 6.246909  | -2.543636 | 1.150649  |
| H  | 6.214611  | -3.152204 | 0.245409  |
| H  | 7.254168  | -2.144692 | 1.288623  |
| H  | 5.951816  | -3.133062 | 2.017294  |
| C  | 5.775715  | 2.424583  | -0.892372 |

|   |          |          |           |
|---|----------|----------|-----------|
| H | 6.735734 | 2.106457 | -0.469401 |
| H | 5.936518 | 2.924606 | -1.848580 |
| H | 5.291028 | 3.115678 | -0.194629 |

-----  
**D<sub>a</sub>**  
 -----

Number of imaginary frequencies: 0    Electronic energy:    HF=-2583.3369244  
 Zero-point correction=                    0.787856 (Hartree/Particle)  
 Thermal correction to Energy=            0.835000  
 Thermal correction to Enthalpy=         0.835945  
 Thermal correction to Gibbs Free Energy= 0.705185  
 Sum of electronic and zero-point Energies= -2582.549068  
 Sum of electronic and thermal Energies= -2582.501924  
 Sum of electronic and thermal Enthalpies= -2582.500980  
 Sum of electronic and thermal Free Energies= -2582.631739

.....  
 Cartesian Coordinates  
 .....

|   |           |           |           |
|---|-----------|-----------|-----------|
| C | -2.659929 | -1.689358 | -1.058632 |
| C | -1.874380 | -0.679863 | -1.639267 |
| C | -0.852825 | -1.032492 | -2.534523 |
| C | -0.636714 | -2.369319 | -2.865662 |
| C | -1.422028 | -3.374567 | -2.293484 |
| C | -2.424771 | -3.028924 | -1.387682 |
| H | -0.249395 | -0.251577 | -2.985473 |
| H | -1.249577 | -4.415111 | -2.552488 |
| C | -2.048525 | 0.743786  | -1.297848 |
| C | -3.747329 | -1.564572 | 0.000535  |
| C | -3.908018 | -3.039073 | 0.504234  |
| H | -4.946906 | -3.254254 | 0.762771  |
| H | -3.304251 | -3.191884 | 1.397653  |
| C | -3.377362 | -3.933652 | -0.641028 |
| O | -3.250521 | 1.290199  | -1.485063 |
| C | -1.718605 | 2.869631  | -0.598901 |
| N | -1.132009 | 1.519661  | -0.815976 |
| C | -3.393216 | -0.567721 | 1.094558  |
| C | -2.151921 | -0.354612 | 1.715722  |
| C | -1.994762 | 0.733520  | 2.590347  |
| C | -3.076739 | 1.568796  | 2.869693  |
| C | -4.322408 | 1.335549  | 2.278564  |
| C | -4.469552 | 0.276200  | 1.382270  |
| H | -1.031377 | 0.918728  | 3.052110  |
| H | -5.163364 | 1.984992  | 2.504381  |
| C | -0.988786 | -1.224368 | 1.462617  |
| C | -5.100181 | -0.998250 | -0.553122 |
| H | -5.768921 | -1.805864 | -0.858337 |
| H | -4.909109 | -0.375297 | -1.426198 |
| C | -5.686980 | -0.128493 | 0.583925  |
| O | -1.113226 | -2.522462 | 1.734630  |
| C | 1.091832  | -2.007664 | 1.038332  |
| H | 1.537735  | -2.112401 | 0.048688  |
| N | 0.168335  | -0.843051 | 1.020548  |
| C | 0.126397  | -3.177030 | 1.322031  |
| H | -0.104414 | -3.765116 | 0.431261  |
| H | 0.433496  | -3.831234 | 2.136845  |
| C | -3.204459 | 2.654063  | -0.962586 |



|    |           |           |           |
|----|-----------|-----------|-----------|
| H  | -3.867411 | 2.687097  | -0.097380 |
| H  | -3.576228 | 3.313285  | -1.746623 |
| H  | -2.944545 | 2.400324  | 3.553773  |
| H  | -4.186816 | -4.249858 | -1.310891 |
| H  | -2.897594 | -4.845732 | -0.273963 |
| H  | -6.371735 | -0.705879 | 1.217691  |
| H  | -6.252319 | 0.728629  | 0.206682  |
| H  | 0.139370  | -2.625003 | -3.578581 |
| H  | -1.610489 | 3.105892  | 0.462443  |
| Fe | 0.547443  | 1.001720  | 0.264831  |
| Cl | 0.990473  | 2.723975  | 1.737830  |
| C  | 3.457585  | 0.658522  | -0.499568 |
| C  | 3.764103  | -0.678465 | -1.003297 |
| C  | 4.949732  | -1.371097 | -0.678378 |
| C  | 2.837956  | -1.326867 | -1.847292 |
| C  | 5.182626  | -2.651697 | -1.171412 |
| H  | 5.685343  | -0.902829 | -0.041368 |
| C  | 3.080414  | -2.610177 | -2.333401 |
| H  | 1.915230  | -0.826220 | -2.111758 |
| C  | 4.252985  | -3.285573 | -1.998714 |
| H  | 6.104465  | -3.159108 | -0.904091 |
| H  | 2.346373  | -3.083968 | -2.977570 |
| H  | 4.444086  | -4.282910 | -2.380614 |
| C  | 4.218956  | 1.510569  | 0.253450  |
| O  | 3.841837  | 2.737547  | 0.624524  |
| O  | 5.459071  | 1.169433  | 0.612279  |
| C  | 6.136933  | 1.991357  | 1.584666  |
| H  | 5.552152  | 2.066413  | 2.504082  |
| H  | 7.078486  | 1.477947  | 1.773297  |
| H  | 6.321804  | 2.989562  | 1.185165  |
| C  | 2.222286  | -1.805519 | 2.065492  |
| H  | 2.778793  | -0.924892 | 1.720795  |
| C  | 3.175840  | -3.006076 | 2.033399  |
| H  | 4.050695  | -2.810662 | 2.659426  |
| H  | 2.696947  | -3.911415 | 2.423874  |
| H  | 3.528742  | -3.210728 | 1.019391  |
| C  | 1.700469  | -1.521929 | 3.477584  |
| H  | 1.095327  | -0.611593 | 3.508022  |
| H  | 1.096096  | -2.350724 | 3.864024  |
| H  | 2.537192  | -1.384321 | 4.167835  |
| C  | -0.976686 | 3.944721  | -1.411948 |
| H  | 0.072155  | 3.873935  | -1.096061 |
| C  | -1.483492 | 5.339094  | -1.026267 |
| H  | -0.921792 | 6.112781  | -1.556517 |
| H  | -2.540437 | 5.468908  | -1.286792 |
| H  | -1.371895 | 5.517675  | 0.047590  |
| C  | -1.055021 | 3.708100  | -2.923976 |
| H  | -0.752465 | 2.691876  | -3.197309 |
| H  | -2.068668 | 3.864609  | -3.307961 |
| H  | -0.402193 | 4.407479  | -3.453645 |
| O  | 2.215921  | 1.198931  | -0.935057 |
| C  | 2.316942  | 2.042913  | -2.109947 |
| H  | 1.299237  | 2.273745  | -2.420935 |
| H  | 2.856275  | 2.956443  | -1.852016 |
| H  | 2.842297  | 1.492096  | -2.892266 |
| H  | 2.886896  | 2.781632  | 0.866940  |

---

**D<sub>e</sub>**

---

Number of imaginary frequencies: 0    Electronic energy:    HF=-2583.3250947  
Zero-point correction=                    0.787983 (Hartree/Particle)  
Thermal correction to Energy=            0.834949  
Thermal correction to Enthalpy=         0.835893  
Thermal correction to Gibbs Free Energy= 0.706234  
Sum of electronic and zero-point Energies= -2582.537112  
Sum of electronic and thermal Energies= -2582.490146  
Sum of electronic and thermal Enthalpies= -2582.489202  
Sum of electronic and thermal Free Energies= -2582.618860

.....  
Cartesian Coordinates  
.....

|   |           |           |           |
|---|-----------|-----------|-----------|
| C | -2.415078 | -0.152855 | -1.921308 |
| C | -1.053790 | 0.155986  | -1.751059 |
| C | -0.080152 | -0.691111 | -2.306923 |
| C | -0.465896 | -1.799579 | -3.060409 |
| C | -1.819714 | -2.090028 | -3.255772 |
| C | -2.786855 | -1.274572 | -2.669199 |
| H | 0.970859  | -0.464660 | -2.172820 |
| H | -2.113744 | -2.953766 | -3.845391 |
| C | -0.609318 | 1.345977  | -1.003791 |
| C | -3.633675 | 0.511274  | -1.294011 |
| C | -4.744045 | -0.578086 | -1.473816 |
| H | -5.725844 | -0.121627 | -1.617197 |
| H | -4.792715 | -1.205309 | -0.584022 |
| C | -4.290064 | -1.428921 | -2.682124 |
| O | -1.100477 | 2.526147  | -1.386542 |
| C | 0.457135  | 2.799058  | 0.369100  |
| 7 | 0.226399  | 1.374983  | -0.013016 |
| C | -3.409754 | 0.930184  | 0.151290  |
| C | -2.703330 | 0.260534  | 1.165238  |
| C | -2.487212 | 0.904787  | 2.397271  |
| C | -3.003118 | 2.179683  | 2.623157  |
| C | -3.731558 | 2.833747  | 1.624334  |
| C | -3.919347 | 2.210504  | 0.390382  |
| H | -1.923498 | 0.401732  | 3.175143  |
| H | -4.132849 | 3.826955  | 1.804185  |
| C | -2.113876 | -1.072741 | 0.972153  |
| C | -4.051700 | 1.856316  | -1.979649 |
| H | -4.776302 | 1.682538  | -2.778108 |
| H | -3.176569 | 2.332997  | -2.419186 |
| C | -4.610708 | 2.743817  | -0.842928 |
| O | -2.881521 | -2.056155 | 0.503783  |
| C | -0.727468 | -2.852648 | 1.040517  |
| H | 0.157983  | -3.030077 | 0.422361  |
| 7 | -0.882353 | -1.391935 | 1.236035  |
| C | -2.011715 | -3.207292 | 0.265852  |
| H | -1.858791 | -3.272223 | -0.812779 |
| H | -2.533527 | -4.090285 | 0.631395  |
| C | -0.649792 | 3.524380  | -0.419285 |
| H | -1.514313 | 3.785071  | 0.194259  |
| H | -0.308232 | 4.391702  | -0.982015 |
| H | -2.834515 | 2.660936  | 3.580500  |

|    |           |           |           |
|----|-----------|-----------|-----------|
| H  | -4.697507 | -1.037049 | -3.622679 |
| H  | -4.611462 | -2.471752 | -2.607561 |
| H  | -5.696829 | 2.626184  | -0.739898 |
| H  | -4.422284 | 3.808453  | -1.008707 |
| H  | 0.299705  | -2.429952 | -3.496121 |
| H  | 0.292459  | 2.890641  | 1.445514  |
| Fe | 0.600835  | -0.012212 | 1.425388  |
| Cl | 1.071917  | 0.926869  | 3.466619  |
| C  | 3.878042  | 0.157650  | -0.239809 |
| C  | 3.467549  | -0.022779 | 1.031343  |
| O  | 3.926717  | 0.678588  | 2.079572  |
| O  | 2.500510  | -0.992707 | 1.327299  |
| C  | 2.919875  | -1.962178 | 2.333062  |
| H  | 2.810760  | -1.534853 | 3.330428  |
| H  | 2.267760  | -2.824951 | 2.209787  |
| H  | 3.957277  | -2.239694 | 2.140216  |
| C  | -0.560144 | -3.569155 | 2.397172  |
| H  | 0.284167  | -3.075563 | 2.894603  |
| C  | -0.196996 | -5.042166 | 2.176130  |
| H  | -0.006139 | -5.539018 | 3.130849  |
| H  | -1.010493 | -5.587135 | 1.684205  |
| H  | 0.699096  | -5.149188 | 1.554617  |
| C  | -1.778525 | -3.409923 | 3.313590  |
| H  | -2.009206 | -2.357361 | 3.499478  |
| H  | -2.670965 | -3.889531 | 2.898202  |
| H  | -1.580986 | -3.878024 | 4.281420  |
| C  | 1.897885  | 3.235398  | 0.046304  |
| H  | 2.557814  | 2.535331  | 0.569197  |
| C  | 2.159861  | 4.634886  | 0.614666  |
| H  | 3.201907  | 4.920588  | 0.449465  |
| H  | 1.533347  | 5.394134  | 0.131815  |
| H  | 1.967591  | 4.671352  | 1.691945  |
| C  | 2.217656  | 3.156057  | -1.448903 |
| H  | 2.016076  | 2.159825  | -1.850926 |
| H  | 1.642360  | 3.885388  | -2.030002 |
| H  | 3.277554  | 3.361440  | -1.609891 |
| O  | 4.618259  | 1.292051  | -0.483000 |
| C  | 6.032337  | 1.066282  | -0.570677 |
| H  | 6.481215  | 2.028103  | -0.820880 |
| H  | 6.423802  | 0.716577  | 0.390232  |
| H  | 6.266251  | 0.336358  | -1.354020 |
| H  | 3.182668  | 0.917677  | 2.674058  |
| C  | 3.564934  | -0.692745 | -1.403919 |
| C  | 3.649040  | -0.114978 | -2.683860 |
| C  | 3.227848  | -2.055784 | -1.308824 |
| C  | 3.386772  | -0.867246 | -3.827055 |
| H  | 3.926024  | 0.928807  | -2.766495 |
| C  | 2.974572  | -2.805855 | -2.454255 |
| H  | 3.189915  | -2.539361 | -0.341800 |
| C  | 3.049753  | -2.217110 | -3.719251 |
| H  | 3.455427  | -0.399303 | -4.803974 |
| H  | 2.735233  | -3.860933 | -2.359997 |
| H  | 2.862437  | -2.807798 | -4.610434 |

---

**D<sub>e</sub>**

---

Number of imaginary frequencies: 0    Electronic energy:    HF=-2583.3270359  
 Zero-point correction=                    0.788080 (Hartree/Particle)  
 Thermal correction to Energy=            0.835232  
 Thermal correction to Enthalpy=         0.836176  
 Thermal correction to Gibbs Free Energy= 0.707245  
 Sum of electronic and zero-point Energies= -2582.538956  
 Sum of electronic and thermal Energies= -2582.491804  
 Sum of electronic and thermal Enthalpies= -2582.490860  
 Sum of electronic and thermal Free Energies= -2582.619791

.....  
 Cartesian Coordinates

.....

|   |           |           |           |
|---|-----------|-----------|-----------|
| C | 1.717056  | -1.979038 | 1.354116  |
| C | 1.057625  | -0.773630 | 1.648872  |
| C | -0.243937 | -0.813110 | 2.172974  |
| C | -0.862661 | -2.034293 | 2.435753  |
| C | -0.194339 | -3.233909 | 2.169376  |
| C | 1.085448  | -3.199245 | 1.616197  |
| H | -0.764637 | 0.115356  | 2.370083  |
| H | -0.678150 | -4.184892 | 2.373969  |
| C | 1.675438  | 0.538375  | 1.379976  |
| C | 3.044013  | -2.189933 | 0.637515  |
| C | 2.966334  | -3.694294 | 0.207759  |
| H | 3.952613  | -4.162700 | 0.234920  |
| H | 2.588113  | -3.768405 | -0.810707 |
| C | 1.962161  | -4.351899 | 1.183962  |
| O | 2.880309  | 0.767421  | 1.910881  |
| C | 2.125771  | 2.633153  | 0.660231  |
| N | 1.168419  | 1.495113  | 0.673578  |
| C | 3.247159  | -1.216198 | -0.515873 |
| C | 2.298066  | -0.721681 | -1.427352 |
| C | 2.660083  | 0.314242  | -2.305727 |
| C | 3.961507  | 0.813955  | -2.302193 |
| C | 4.915128  | 0.298382  | -1.418168 |
| C | 4.546916  | -0.701509 | -0.517667 |
| H | 1.920138  | 0.726125  | -2.982663 |
| H | 5.928258  | 0.690417  | -1.419277 |
| C | 0.921283  | -1.235910 | -1.490559 |
| C | 4.305098  | -1.928058 | 1.529124  |
| H | 4.633401  | -2.843447 | 2.026431  |
| H | 4.066496  | -1.194902 | 2.298505  |
| C | 5.372127  | -1.345909 | 0.572440  |
| O | 0.765747  | -2.561356 | -1.584017 |
| C | -1.296996 | -1.458848 | -1.796593 |
| H | -2.104125 | -1.252085 | -1.092128 |
| N | -0.169135 | -0.532432 | -1.511959 |
| C | -0.665108 | -2.829302 | -1.501695 |
| H | -0.868469 | -3.184595 | -0.489003 |
| H | -0.895452 | -3.604423 | -2.231102 |
| C | 3.347299  | 2.054639  | 1.406795  |
| H | 4.194522  | 1.853954  | 0.749833  |
| H | 3.670045  | 2.641562  | 2.266621  |
| H | 4.228591  | 1.608850  | -2.990400 |
| H | 2.473677  | -4.778735 | 2.056028  |
| H | 1.395962  | -5.165036 | 0.720225  |
| H | 6.001733  | -2.137303 | 0.146284  |

|    |           |           |           |
|----|-----------|-----------|-----------|
| H  | 6.043797  | -0.640740 | 1.070645  |
| H  | -1.866465 | -2.045863 | 2.844443  |
| H  | 2.369013  | 2.842863  | -0.383807 |
| Fe | -0.314752 | 1.406675  | -0.789351 |
| Cl | 0.196616  | 3.103493  | -2.233444 |
| C  | -3.099634 | 0.901674  | 0.329696  |
| C  | -3.664851 | 0.021208  | 1.351928  |
| C  | -4.261315 | -1.202993 | 0.997856  |
| C  | -3.557688 | 0.347157  | 2.715017  |
| C  | -4.763371 | -2.057972 | 1.976472  |
| H  | -4.309717 | -1.493498 | -0.046748 |
| C  | -4.054179 | -0.513678 | 3.690604  |
| H  | -3.076084 | 1.272175  | 3.011837  |
| C  | -4.665185 | -1.716542 | 3.326772  |
| H  | -5.219103 | -2.998732 | 1.684226  |
| H  | -3.965649 | -0.244289 | 4.738174  |
| H  | -5.054117 | -2.383617 | 4.088904  |
| C  | -3.454126 | 1.033422  | -0.968849 |
| O  | -2.526832 | 1.588985  | -1.794593 |
| O  | -4.559317 | 0.626657  | -1.607785 |
| C  | -5.839529 | 0.820551  | -0.964640 |
| H  | -6.051714 | 0.004984  | -0.271649 |
| H  | -5.845330 | 1.771553  | -0.426348 |
| H  | -6.571834 | 0.831731  | -1.770698 |
| C  | -1.817024 | -1.279055 | -3.238428 |
| H  | -2.070227 | -0.218776 | -3.330926 |
| C  | -3.100150 | -2.094816 | -3.438212 |
| H  | -3.496962 | -1.942951 | -4.445741 |
| H  | -2.921507 | -3.169758 | -3.319934 |
| H  | -3.875520 | -1.794701 | -2.726203 |
| C  | -0.760778 | -1.601118 | -4.301363 |
| H  | 0.136199  | -0.988157 | -4.177451 |
| H  | -0.461755 | -2.654472 | -4.280812 |
| H  | -1.160770 | -1.398011 | -5.298453 |
| C  | 1.509806  | 3.901563  | 1.274636  |
| H  | 0.628232  | 4.119126  | 0.659055  |
| C  | 2.474494  | 5.083491  | 1.125141  |
| H  | 2.015111  | 6.004002  | 1.495646  |
| H  | 3.396449  | 4.927859  | 1.697438  |
| H  | 2.745332  | 5.240981  | 0.076677  |
| C  | 1.070023  | 3.701101  | 2.728910  |
| H  | 0.402420  | 2.839965  | 2.836323  |
| H  | 1.925676  | 3.540668  | 3.393678  |
| H  | 0.543985  | 4.587319  | 3.096186  |
| O  | -1.941777 | 1.628183  | 0.701543  |
| C  | -2.200746 | 3.039766  | 0.937919  |
| H  | -1.323670 | 3.430689  | 1.449342  |
| H  | -2.343340 | 3.557409  | -0.013817 |
| H  | -3.084330 | 3.142450  | 1.570029  |
| H  | -2.917086 | 2.050772  | -2.551858 |

---

**F**

---

Number of imaginary frequencies: 0    Electronic energy:    HF=-613.9050605  
Zero-point correction=                    0.203690 (Hartree/Particle)  
Thermal correction to Energy=            0.216695

Thermal correction to Enthalpy= 0.217639  
 Thermal correction to Gibbs Free Energy= 0.163712  
 Sum of electronic and zero-point Energies= -613.701371  
 Sum of electronic and thermal Energies= -613.688365  
 Sum of electronic and thermal Enthalpies= -613.687421  
 Sum of electronic and thermal Free Energies= -613.741348

.....  
 Cartesian Coordinates

.....

|   |           |           |           |
|---|-----------|-----------|-----------|
| C | 0.852994  | 0.031250  | -0.120474 |
| C | 1.223688  | -1.339778 | -0.072305 |
| C | 2.552253  | -1.716061 | 0.045486  |
| C | 3.581645  | -0.767360 | 0.112569  |
| C | 3.241363  | 0.580641  | 0.076264  |
| C | 1.907743  | 0.977671  | -0.028118 |
| H | 0.445148  | -2.087747 | -0.136533 |
| H | 2.793794  | -2.775257 | 0.076951  |
| H | 4.618080  | -1.076546 | 0.197331  |
| H | 4.013639  | 1.342065  | 0.144828  |
| H | 1.708735  | 2.048765  | 0.021600  |
| C | -0.510793 | 0.427758  | -0.292763 |
| C | -1.789727 | -0.150783 | -0.157270 |
| O | -2.858656 | 0.474516  | -0.169447 |
| O | -1.746504 | -1.509996 | 0.027184  |
| C | -3.021498 | -2.117939 | 0.241260  |
| H | -2.819520 | -3.181149 | 0.378666  |
| H | -3.511069 | -1.707329 | 1.129020  |
| H | -3.680697 | -1.964676 | -0.617475 |
| O | -0.674997 | 1.884333  | -0.539640 |
| H | 0.149801  | 2.197766  | -0.955755 |
| C | -1.046610 | 2.706827  | 0.631190  |
| H | -0.323064 | 2.526664  | 1.425904  |
| H | -2.043479 | 2.348122  | 0.877749  |
| H | -1.056475 | 3.745137  | 0.297892  |

-----  
**F'**

-----

Number of imaginary frequencies: 0    Electronic energy:    HF=-766.8288898  
 Zero-point correction= 0.252446 (Hartree/Particle)  
 Thermal correction to Energy= 0.269699  
 Thermal correction to Enthalpy= 0.270643  
 Thermal correction to Gibbs Free Energy= 0.206227  
 Sum of electronic and zero-point Energies= -766.576444  
 Sum of electronic and thermal Energies= -766.559191  
 Sum of electronic and thermal Enthalpies= -766.558247  
 Sum of electronic and thermal Free Energies= -766.622663

.....  
 Cartesian Coordinates

.....

|   |          |           |           |
|---|----------|-----------|-----------|
| C | 0.041163 | -0.127604 | -0.270170 |
| C | 1.066609 | 0.807008  | -0.356133 |
| O | 2.273479 | 0.540401  | -0.652400 |
| O | 0.710455 | 2.107111  | -0.103022 |
| C | 1.755539 | 3.066292  | -0.246625 |
| H | 2.550919 | 2.908524  | 0.489622  |
| H | 1.285823 | 4.036511  | -0.078445 |

|   |           |           |           |
|---|-----------|-----------|-----------|
| H | 2.199872  | 3.026944  | -1.244470 |
| C | 0.867921  | -1.766855 | -1.913392 |
| H | 1.686015  | -1.107489 | -2.202654 |
| H | -0.019239 | -1.606038 | -2.525273 |
| O | 0.495787  | -1.474582 | -0.539861 |
| C | -1.383869 | -0.035327 | -0.025054 |
| C | -2.036020 | 1.192308  | 0.241008  |
| C | -2.186434 | -1.200204 | -0.040418 |
| C | -3.406495 | 1.237909  | 0.472892  |
| H | -1.455657 | 2.103849  | 0.260696  |
| C | -3.557790 | -1.139565 | 0.191659  |
| H | -1.724443 | -2.161428 | -0.234733 |
| C | -4.185483 | 0.078495  | 0.451394  |
| H | -3.872795 | 2.199305  | 0.672680  |
| H | -4.138890 | -2.057950 | 0.169095  |
| H | -5.254804 | 0.124515  | 0.632683  |
| H | 1.216652  | -1.844222 | 0.238068  |
| O | 1.988217  | -2.254000 | 1.186123  |
| H | 2.736559  | -1.548596 | 1.303641  |
| H | 3.653131  | 0.210769  | 1.971626  |
| O | 3.704162  | -0.408193 | 1.232929  |
| H | 1.169714  | -2.815481 | -1.937724 |
| H | 1.484671  | -2.290855 | 2.009731  |
| H | 3.254831  | 0.060991  | 0.454336  |

---

**(R)-TS(F-P)**

---

Number of imaginary frequencies: 1    Electronic energy:    HF=-613.8800451  
Zero-point correction=                    0.198472 (Hartree/Particle)  
Thermal correction to Energy=            0.211320  
Thermal correction to Enthalpy=         0.212264  
Thermal correction to Gibbs Free Energy= 0.158550  
Sum of electronic and zero-point Energies= -613.681573  
Sum of electronic and thermal Energies= -613.668726  
Sum of electronic and thermal Enthalpies= -613.667781  
Sum of electronic and thermal Free Energies= -613.721495

.....  
Cartesian Coordinates

.....  

|   |           |           |           |
|---|-----------|-----------|-----------|
| C | 0.514200  | 0.446425  | -0.516124 |
| C | 1.732361  | -0.232180 | -0.120406 |
| O | 2.852810  | 0.274034  | -0.072883 |
| O | 1.534906  | -1.557007 | 0.108614  |
| C | 2.730890  | -2.314545 | 0.333028  |
| H | 3.412393  | -2.227134 | -0.516984 |
| H | 2.402075  | -3.346555 | 0.456097  |
| H | 3.246783  | -1.968104 | 1.231726  |
| C | 1.456346  | 2.635200  | 0.563034  |
| H | 2.492082  | 2.306391  | 0.537970  |
| H | 0.979924  | 2.339596  | 1.499998  |
| O | 0.696738  | 1.993514  | -0.507429 |
| C | -0.881183 | 0.086381  | -0.247399 |
| C | -1.312461 | -1.255374 | -0.300345 |
| C | -1.843555 | 1.075827  | 0.031402  |
| C | -2.642910 | -1.583581 | -0.057610 |
| H | -0.598002 | -2.034655 | -0.526397 |

|   |           |           |           |
|---|-----------|-----------|-----------|
| C | -3.171692 | 0.735078  | 0.279134  |
| H | -1.548560 | 2.117729  | 0.046282  |
| C | -3.583966 | -0.596006 | 0.239084  |
| H | -2.945641 | -2.626011 | -0.103698 |
| H | -3.888317 | 1.521518  | 0.499141  |
| H | -4.620307 | -0.859303 | 0.426553  |
| H | 1.054277  | 1.402333  | -1.390124 |
| H | 1.349477  | 3.706520  | 0.390233  |

-----  
**(R)-TS(F-P)<sub>1w</sub>**  
 -----

Number of imaginary frequencies: 1    Electronic energy:    HF=-690.3558277  
 Zero-point correction=                    0.224070 (Hartree/Particle)  
 Thermal correction to Energy=            0.238506  
 Thermal correction to Enthalpy=         0.239450  
 Thermal correction to Gibbs Free Energy= 0.182135  
 Sum of electronic and zero-point Energies= -690.131758  
 Sum of electronic and thermal Energies= -690.117322  
 Sum of electronic and thermal Enthalpies= -690.116377  
 Sum of electronic and thermal Free Energies= -690.173692

.....  
 Cartesian Coordinates  
 .....

|   |           |           |           |
|---|-----------|-----------|-----------|
| C | 0.460983  | -0.347287 | 0.196920  |
| C | 1.607061  | 0.478176  | -0.146787 |
| O | 2.711299  | 0.045631  | -0.469423 |
| O | 1.385457  | 1.812251  | 0.023746  |
| C | 2.533399  | 2.642010  | -0.184614 |
| H | 3.334218  | 2.382593  | 0.512888  |
| H | 2.191603  | 3.662769  | -0.010606 |
| H | 2.912957  | 2.535120  | -1.203882 |
| C | 1.067808  | -2.078801 | -1.544492 |
| H | 2.021935  | -1.617788 | -1.794104 |
| H | 0.265784  | -1.714456 | -2.188727 |
| O | 0.712388  | -1.747296 | -0.181633 |
| C | -0.967494 | 0.000029  | 0.080949  |
| C | -1.448525 | 1.308084  | 0.301794  |
| C | -1.921363 | -1.000385 | -0.199429 |
| C | -2.808899 | 1.592540  | 0.225088  |
| H | -0.747124 | 2.098193  | 0.530045  |
| C | -3.281431 | -0.705572 | -0.275615 |
| H | -1.592016 | -2.021268 | -0.353759 |
| C | -3.740092 | 0.593920  | -0.066864 |
| H | -3.143659 | 2.611998  | 0.397436  |
| H | -3.984927 | -1.502960 | -0.500179 |
| H | -4.799374 | 0.824084  | -0.125792 |
| H | 1.261992  | -2.104936 | 0.820578  |
| H | 1.009601  | -0.890337 | 1.655245  |
| O | 1.479623  | -1.825532 | 1.998863  |
| H | 0.828518  | -2.272042 | 2.559858  |
| H | 1.121677  | -3.167702 | -1.593124 |

-----  
**(R)-TS(F'-P)<sub>2w</sub>**  
 -----

Number of imaginary frequencies: 1    Electronic energy:    HF=-766.8153541  
 Zero-point correction=                    0.249096 (Hartree/Particle)



Thermal correction to Energy= 0.265559  
 Thermal correction to Enthalpy= 0.266503  
 Thermal correction to Gibbs Free Energy= 0.204377  
 Sum of electronic and zero-point Energies= -766.566259  
 Sum of electronic and thermal Energies= -766.549796  
 Sum of electronic and thermal Enthalpies= -766.548851  
 Sum of electronic and thermal Free Energies= -766.610977

.....  
 Cartesian Coordinates  
 .....

|   |           |           |           |
|---|-----------|-----------|-----------|
| C | -0.305908 | 0.187831  | -0.055743 |
| C | -1.292614 | -0.812891 | -0.395701 |
| O | -2.399125 | -0.571319 | -0.880411 |
| O | -0.960656 | -2.081759 | 0.005946  |
| C | -1.963651 | -3.069233 | -0.245005 |
| H | -2.889875 | -2.836332 | 0.288492  |
| H | -1.545436 | -4.010625 | 0.113635  |
| H | -2.191883 | -3.136254 | -1.311908 |
| C | -0.680860 | 1.556764  | -2.057504 |
| H | -1.419221 | 0.870404  | -2.473687 |
| H | 0.326943  | 1.313078  | -2.399533 |
| O | -0.702746 | 1.474090  | -0.614544 |
| C | 1.157700  | 0.035635  | 0.012880  |
| C | 1.800768  | -1.201599 | 0.233342  |
| C | 1.980187  | 1.178229  | -0.094633 |
| C | 3.187480  | -1.281555 | 0.326722  |
| H | 1.204770  | -2.098505 | 0.327405  |
| C | 3.367213  | 1.087237  | -0.004891 |
| H | 1.518138  | 2.147645  | -0.241653 |
| C | 3.987450  | -0.143729 | 0.205509  |
| H | 3.648034  | -2.252000 | 0.492996  |
| H | 3.965069  | 1.990282  | -0.097369 |
| H | 5.068358  | -0.215392 | 0.277293  |
| H | -1.776509 | 1.914963  | 0.016758  |
| O | -2.531342 | 2.215961  | 0.779811  |
| H | -2.212309 | 1.527079  | 1.598981  |
| H | -0.896068 | 0.364374  | 1.529022  |
| O | -1.522223 | 0.664265  | 2.337717  |
| H | -0.922339 | 2.589614  | -2.319814 |
| H | -2.333643 | 3.121526  | 1.057587  |
| H | -2.041886 | -0.119894 | 2.563786  |

-----  
**(R)-TS(D-P)**  
 -----

Number of imaginary frequencies: 1    Electronic energy:    HF=-613.8786122  
 Zero-point correction= 0.198372 (Hartree/Particle)  
 Thermal correction to Energy= 0.211081  
 Thermal correction to Enthalpy= 0.212025  
 Thermal correction to Gibbs Free Energy= 0.158377  
 Sum of electronic and zero-point Energies= -613.680241  
 Sum of electronic and thermal Energies= -613.667531  
 Sum of electronic and thermal Enthalpies= -613.666587  
 Sum of electronic and thermal Free Energies= -613.720235

.....  
 Cartesian Coordinates  
 .....

|   |           |           |           |
|---|-----------|-----------|-----------|
| C | 0.813209  | 0.106039  | 0.118361  |
| C | 1.144214  | -1.088044 | 0.784051  |
| C | 2.428547  | -1.617825 | 0.708419  |
| C | 3.423618  | -0.952346 | -0.012956 |
| C | 3.111110  | 0.240922  | -0.665665 |
| C | 1.819558  | 0.762470  | -0.607776 |
| H | 0.385357  | -1.598350 | 1.372760  |
| H | 2.659612  | -2.545029 | 1.225528  |
| H | 4.429637  | -1.358059 | -0.060991 |
| H | 3.875580  | 0.764772  | -1.233093 |
| H | 1.568015  | 1.673456  | -1.138918 |
| C | -0.549637 | 0.664358  | 0.226514  |
| C | -1.706037 | -0.206019 | 0.037761  |
| O | -2.670744 | 0.152319  | 0.817965  |
| O | -1.781943 | -1.268051 | -0.716622 |
| C | -2.951348 | -2.110187 | -0.576104 |
| H | -2.690076 | -3.055445 | -1.049484 |
| H | -3.187936 | -2.245428 | 0.480809  |
| H | -3.797490 | -1.645675 | -1.085394 |
| O | -0.760150 | 1.879110  | -0.494147 |
| C | -0.569943 | 3.040209  | 0.299264  |
| H | 0.422502  | 3.051014  | 0.768636  |
| H | -1.330875 | 3.116979  | 1.089119  |
| H | -1.751212 | 0.798086  | 1.273963  |
| H | -0.660153 | 3.899194  | -0.371714 |

-----  
**(R)-TS(D-P)<sub>1w</sub>**  
 -----

Number of imaginary frequencies: 1    Electronic energy:    HF=-690.3697589  
 Zero-point correction=                    0.225097 (Hartree/Particle)  
 Thermal correction to Energy=            0.239096  
 Thermal correction to Enthalpy=         0.240040  
 Thermal correction to Gibbs Free Energy= 0.184113  
 Sum of electronic and zero-point Energies= -690.144661  
 Sum of electronic and thermal Energies= -690.130663  
 Sum of electronic and thermal Enthalpies= -690.129719  
 Sum of electronic and thermal Free Energies= -690.185646

.....  
 Cartesian Coordinates  
 .....

|   |           |           |           |
|---|-----------|-----------|-----------|
| C | -1.021382 | -0.067562 | 0.103677  |
| C | -1.470604 | 1.248165  | 0.333876  |
| C | -2.829328 | 1.550515  | 0.332514  |
| C | -3.784490 | 0.556537  | 0.109799  |
| C | -3.355300 | -0.752867 | -0.102013 |
| C | -1.996444 | -1.062054 | -0.100641 |
| H | -0.751378 | 2.037125  | 0.509085  |
| H | -3.143867 | 2.575542  | 0.509173  |
| H | -4.842838 | 0.798882  | 0.107820  |
| H | -4.081252 | -1.544452 | -0.266847 |
| H | -1.675725 | -2.087185 | -0.241372 |
| C | 0.404857  | -0.456996 | 0.150133  |
| C | 1.518161  | 0.391270  | -0.161345 |
| O | 2.720165  | -0.002815 | -0.011557 |
| O | 1.284714  | 1.669975  | -0.489611 |
| C | 2.425681  | 2.543926  | -0.498361 |

|   |           |           |           |
|---|-----------|-----------|-----------|
| H | 2.027769  | 3.533111  | -0.723306 |
| H | 2.923383  | 2.541256  | 0.474405  |
| H | 3.141277  | 2.235360  | -1.263015 |
| O | 0.657390  | -1.830981 | -0.154768 |
| C | 0.828754  | -2.087224 | -1.548755 |
| H | 1.751083  | -1.624701 | -1.920056 |
| H | -0.026655 | -1.712288 | -2.122370 |
| H | 1.129343  | -0.733902 | 1.544667  |
| O | 2.068614  | -1.222303 | 1.973047  |
| H | 2.602733  | -0.800587 | 1.099653  |
| H | 1.882960  | -2.139609 | 1.709291  |
| H | 0.896684  | -3.171828 | -1.667327 |

-----  
**(R)-TS(D-P)<sub>2w</sub>**  
 -----

Number of imaginary frequencies: 1    Electronic energy:    HF=-766.8291268  
 Zero-point correction=                    0.249880 (Hartree/Particle)  
 Thermal correction to Energy=            0.266052  
 Thermal correction to Enthalpy=         0.266996  
 Thermal correction to Gibbs Free Energy= 0.206103  
 Sum of electronic and zero-point Energies= -766.579247  
 Sum of electronic and thermal Energies= -766.563075  
 Sum of electronic and thermal Enthalpies= -766.562131  
 Sum of electronic and thermal Free Energies= -766.623024

.....  
 Cartesian Coordinates  
 .....

|   |           |           |           |
|---|-----------|-----------|-----------|
| C | -1.195799 | -0.043485 | 0.001552  |
| C | -1.810844 | 1.213184  | 0.173812  |
| C | -3.196137 | 1.323784  | 0.278181  |
| C | -4.015870 | 0.196701  | 0.217146  |
| C | -3.421327 | -1.054843 | 0.056791  |
| C | -2.037837 | -1.174351 | -0.043842 |
| H | -1.203143 | 2.105175  | 0.218777  |
| H | -3.637403 | 2.308976  | 0.404499  |
| H | -5.094555 | 0.291691  | 0.296233  |
| H | -4.036528 | -1.949595 | 0.013494  |
| H | -1.588290 | -2.154558 | -0.148528 |
| C | 0.270586  | -0.262007 | -0.066120 |
| C | 1.283761  | 0.718614  | -0.345841 |
| O | 2.483703  | 0.449828  | -0.606319 |
| O | 0.926372  | 2.015564  | -0.179118 |
| C | 1.987986  | 2.972981  | -0.276515 |
| H | 1.519188  | 3.942467  | -0.106610 |
| H | 2.757922  | 2.784052  | 0.476596  |
| H | 2.452992  | 2.940808  | -1.264179 |
| O | 0.631232  | -1.557761 | -0.566546 |
| C | 0.557677  | -1.652624 | -1.994289 |
| H | 1.301138  | -0.997940 | -2.461803 |
| H | -0.445250 | -1.384984 | -2.342094 |
| H | 0.755084  | -0.518152 | 1.434486  |
| O | 1.347079  | -0.913778 | 2.287340  |
| H | 1.600765  | -0.163408 | 2.842834  |
| H | 2.250271  | -2.153053 | 0.181266  |
| O | 2.963039  | -1.696395 | 0.685430  |
| H | 2.987149  | -0.841492 | 0.122619  |

|   |          |           |           |
|---|----------|-----------|-----------|
| H | 2.269095 | -1.324540 | 1.617875  |
| H | 0.766976 | -2.692845 | -2.257005 |

-----  
**(R)-TS(D-P)<sub>3w</sub>**  
 -----

Number of imaginary frequencies: 1    Electronic energy:    HF=-843.2689692  
 Zero-point correction=                    0.276244 (Hartree/Particle)  
 Thermal correction to Energy=            0.294770  
 Thermal correction to Enthalpy=           0.295714  
 Thermal correction to Gibbs Free Energy= 0.229494  
 Sum of electronic and zero-point Energies= -842.992725  
 Sum of electronic and thermal Energies= -842.974199  
 Sum of electronic and thermal Enthalpies= -842.973255  
 Sum of electronic and thermal Free Energies= -843.039475

.....  
 Cartesian Coordinates  
 .....

|   |           |           |           |
|---|-----------|-----------|-----------|
| C | 0.032185  | -0.272916 | 0.085848  |
| C | 1.509105  | -0.099741 | 0.024953  |
| C | 2.112121  | 0.569517  | -1.051048 |
| C | 2.340005  | -0.601017 | 1.041668  |
| C | 3.492965  | 0.745273  | -1.103374 |
| H | 1.484476  | 0.958333  | -1.846493 |
| C | 3.723849  | -0.444435 | 0.978831  |
| H | 1.884621  | -1.102286 | 1.890081  |
| C | 4.308691  | 0.231846  | -0.092788 |
| H | 3.935751  | 1.271665  | -1.944420 |
| H | 4.345995  | -0.841786 | 1.776237  |
| H | 5.386407  | 0.355858  | -0.141423 |
| C | -0.788402 | 0.848067  | 0.439448  |
| O | -1.887304 | 0.782978  | 1.029312  |
| O | -0.314675 | 2.040656  | -0.015441 |
| C | -1.152412 | 3.170560  | 0.225672  |
| H | -2.093317 | 3.094895  | -0.330585 |
| H | -1.383667 | 3.272039  | 1.289054  |
| H | -0.586040 | 4.034782  | -0.122816 |
| C | 0.064289  | -2.677130 | 0.279776  |
| H | -0.436603 | -3.473186 | 0.835582  |
| H | -0.169763 | -2.766443 | -0.787824 |
| O | -0.414433 | -1.442960 | 0.823920  |
| H | -3.446009 | 0.808989  | 0.503570  |
| H | -0.682097 | -0.580473 | -1.359368 |
| O | -4.278660 | 0.396722  | 0.147304  |
| H | -4.887401 | 0.358176  | 0.895926  |
| H | -2.286541 | -1.412025 | -1.168268 |
| O | -1.385767 | -0.998819 | -2.079317 |
| H | -1.702404 | -0.267906 | -2.627916 |
| O | -2.817568 | -1.686311 | -0.232441 |
| H | -2.071399 | -1.543294 | 0.429951  |
| H | -3.505148 | -0.954228 | -0.060064 |
| H | 1.146017  | -2.771392 | 0.408168  |

-----  
**(R)-TS(Df-P)<sub>2w</sub>**  
 -----

Number of imaginary frequencies: 1    Electronic energy:    HF=-2736.2143707  
 Zero-point correction=                    0.834086 (Hartree/Particle)

|                                              |              |
|----------------------------------------------|--------------|
| Thermal correction to Energy=                | 0.884396     |
| Thermal correction to Enthalpy=              | 0.885340     |
| Thermal correction to Gibbs Free Energy=     | 0.749724     |
| Sum of electronic and zero-point Energies=   | -2735.380285 |
| Sum of electronic and thermal Energies=      | -2735.329974 |
| Sum of electronic and thermal Enthalpies=    | -2735.329030 |
| Sum of electronic and thermal Free Energies= | -2735.464646 |

.....  
Cartesian Coordinates  
.....

|   |           |           |           |
|---|-----------|-----------|-----------|
| C | -2.639587 | -1.808070 | -1.158969 |
| C | -1.711098 | -0.861357 | -1.623926 |
| C | -0.597991 | -1.302467 | -2.357214 |
| C | -0.429394 | -2.655766 | -2.645173 |
| C | -1.356652 | -3.596894 | -2.185335 |
| C | -2.447411 | -3.167843 | -1.431679 |
| H | 0.117369  | -0.578233 | -2.723718 |
| H | -1.219847 | -4.651755 | -2.404870 |
| C | -1.892410 | 0.586906  | -1.394713 |
| C | -3.862606 | -1.601835 | -0.275383 |
| C | -4.133039 | -3.043184 | 0.270914  |
| H | -5.199547 | -3.207447 | 0.440278  |
| H | -3.615450 | -3.182023 | 1.219075  |
| C | -3.537724 | -3.996041 | -0.791529 |
| O | -3.063684 | 1.090874  | -1.806827 |
| C | -1.676284 | 2.779554  | -0.926900 |
| N | -1.056924 | 1.422013  | -0.866320 |
| C | -3.670385 | -0.546432 | 0.803024  |
| C | -2.523622 | -0.258959 | 1.562641  |
| C | -2.512917 | 0.876334  | 2.392276  |
| C | -3.644834 | 1.682005  | 2.494510  |
| C | -4.798045 | 1.376577  | 1.763449  |
| C | -4.797560 | 0.274558  | 0.908514  |
| H | -1.617283 | 1.119934  | 2.952397  |
| H | -5.678486 | 2.007588  | 1.844949  |
| C | -1.310053 | -1.082034 | 1.497571  |
| C | -5.115955 | -1.068445 | -1.050266 |
| H | -5.715748 | -1.891548 | -1.445237 |
| H | -4.794887 | -0.452001 | -1.888822 |
| C | -5.884308 | -0.196555 | -0.030272 |
| O | -1.450069 | -2.411673 | 1.569753  |
| C | 0.817048  | -1.809290 | 1.572271  |
| H | 1.594367  | -1.765207 | 0.804990  |
| N | -0.092927 | -0.644329 | 1.409355  |
| C | -0.134305 | -2.987387 | 1.310373  |
| H | -0.128543 | -3.323192 | 0.270969  |
| H | -0.007740 | -3.834065 | 1.983270  |
| C | -3.120791 | 2.477866  | -1.361489 |
| H | -3.831609 | 2.519864  | -0.534332 |
| H | -3.481453 | 3.076169  | -2.197510 |
| H | -3.623996 | 2.551220  | 3.143058  |
| H | -4.286444 | -4.273301 | -1.544509 |
| H | -3.162860 | -4.928388 | -0.359442 |
| H | -6.626410 | -0.787005 | 0.522038  |
| H | -6.424299 | 0.628244  | -0.504136 |
| H | 0.424850  | -2.974352 | -3.233525 |

|    |           |           |           |
|----|-----------|-----------|-----------|
| H  | -1.653372 | 3.195457  | 0.079444  |
| Fe | 0.561332  | 1.129902  | 0.548346  |
| Cl | 0.291064  | 3.194238  | 1.692216  |
| C  | 3.326321  | 0.311792  | -0.556766 |
| C  | 3.926766  | -0.789828 | -1.356866 |
| C  | 5.309177  | -0.860127 | -1.567448 |
| C  | 3.108141  | -1.795830 | -1.894972 |
| C  | 5.863922  | -1.918312 | -2.285737 |
| H  | 5.951970  | -0.087975 | -1.156046 |
| C  | 3.662232  | -2.844353 | -2.626523 |
| H  | 2.037349  | -1.750628 | -1.730384 |
| C  | 5.042767  | -2.910861 | -2.823356 |
| H  | 6.938054  | -1.961719 | -2.435979 |
| H  | 3.017833  | -3.617531 | -3.035247 |
| H  | 5.475304  | -3.727791 | -3.391767 |
| C  | 3.407948  | 0.317896  | 0.859307  |
| O  | 2.562621  | 0.917844  | 1.592076  |
| O  | 4.506946  | -0.239452 | 1.383306  |
| C  | 4.803692  | 0.042364  | 2.763856  |
| H  | 5.035318  | 1.103474  | 2.896776  |
| H  | 3.971237  | -0.233444 | 3.410633  |
| H  | 5.680743  | -0.559653 | 2.994475  |
| C  | 1.478260  | -1.802525 | 2.965644  |
| H  | 1.921229  | -0.807736 | 3.064715  |
| C  | 2.597994  | -2.849522 | 3.013305  |
| H  | 3.113864  | -2.819269 | 3.977438  |
| H  | 2.206289  | -3.865947 | 2.891306  |
| H  | 3.338757  | -2.677628 | 2.225407  |
| C  | 0.477009  | -1.978959 | 4.112743  |
| H  | -0.302531 | -1.212121 | 4.090941  |
| H  | -0.007867 | -2.960620 | 4.094210  |
| H  | 0.993043  | -1.892211 | 5.073003  |
| C  | -0.880023 | 3.717261  | -1.852715 |
| H  | 0.162877  | 3.637748  | -1.519646 |
| C  | -1.327240 | 5.167639  | -1.636427 |
| H  | -0.746890 | 5.850275  | -2.263665 |
| H  | -2.383025 | 5.302569  | -1.899784 |
| H  | -1.195161 | 5.466683  | -0.592440 |
| C  | -0.959971 | 3.321406  | -3.332493 |
| H  | -0.766626 | 2.256189  | -3.494472 |
| H  | -1.946592 | 3.539954  | -3.753901 |
| H  | -0.230214 | 3.886262  | -3.919536 |
| O  | 1.983765  | 0.677254  | -0.970211 |
| C  | 1.950943  | 1.306175  | -2.268701 |
| H  | 0.906888  | 1.511498  | -2.482110 |
| H  | 2.522965  | 2.236308  | -2.250378 |
| H  | 2.367053  | 0.623427  | -3.012689 |
| H  | 3.088950  | 2.539517  | 1.955064  |
| O  | 3.299172  | 3.456268  | 1.641162  |
| H  | 3.760886  | 3.239309  | 0.518998  |
| O  | 4.180950  | 2.869083  | -0.530859 |
| H  | 4.015078  | 1.781789  | -0.601074 |
| H  | 5.117398  | 3.078080  | -0.659016 |
| H  | 2.387721  | 3.833628  | 1.594400  |

---

**(R)-TS(Df-P)<sub>1w</sub>**

```

-----
Number of imaginary frequencies: 1  Electronic energy:    HF=-2659.6742271
Zero-point correction=              0.812716 (Hartree/Particle)
Thermal correction to Energy=       0.861086
Thermal correction to Enthalpy=     0.862030
Thermal correction to Gibbs Free Energy= 0.729658
Sum of electronic and zero-point Energies= -2658.861511
Sum of electronic and thermal Energies= -2658.813141
Sum of electronic and thermal Enthalpies= -2658.812197
Sum of electronic and thermal Free Energies= -2658.944569

```

.....  
Cartesian Coordinates

```

.....
C      -1.798133  -0.063318  2.303102
C      -0.745806  -0.761257  1.692782
C       0.581326  -0.463418  2.043164
C       0.850900  0.510911  3.005542
C      -0.197085  1.205864  3.615727
C      -1.515595  0.916171  3.260515
H       1.394451  -1.007603  1.574902
H       0.014816  1.964152  4.364138
C      -0.990145  -1.704730  0.588626
C      -3.297062  -0.196366  2.074856
C      -3.845239  1.116034  2.725025
H      -4.843380  0.965852  3.142544
H      -3.918725  1.895109  1.964870
C      -2.797137  1.520878  3.787636
O      -1.774757  -2.761273  0.782494
C      -1.014682  -2.628582  -1.471504
N      -0.513213  -1.539679  -0.600696
C      -3.713922  -0.388665  0.623110
C      -3.242334  0.268184  -0.521213
C      -3.686898  -0.145966  -1.786130
C      -4.621076  -1.176265  -1.900763
C      -5.126776  -1.801818  -0.756527
C      -4.658597  -1.413596  0.497841
H      -3.316080  0.358406  -2.672546
H      -5.869031  -2.589589  -0.847093
C      -2.389163  1.476042  -0.444200
C      -3.879821  -1.478451  2.764460
H      -4.199009  -1.268198  3.787789
H      -3.108264  -2.248490  2.806827
C      -5.032723  -1.959586  1.855561
O      -3.050417  2.593987  -0.086961
C      -0.800485  3.052780  -0.639331
H       0.048200  3.152305  0.036298
N      -1.142467  1.607074  -0.728708
C      -2.073625  3.668942  -0.023722
H      -1.953359  3.942654  1.027504
H      -2.478885  4.516145  -0.577392
C      -1.933418  -3.426324  -0.511108
H      -2.988827  -3.365974  -0.773534
H      -1.636621  -4.466118  -0.375018
H      -4.965615  -1.479727  -2.884003
H      -3.033007  1.088678  4.768370
H      -2.734008  2.604136  3.927821

```

|    |           |           |           |
|----|-----------|-----------|-----------|
| H  | -5.995977 | -1.539943 | 2.171999  |
| H  | -5.143683 | -3.047720 | 1.861473  |
| H  | 1.881230  | 0.724924  | 3.268293  |
| H  | -1.606948 | -2.166571 | -2.267038 |
| Fe | 0.492073  | 0.226527  | -1.005643 |
| Cl | 0.988808  | 0.333985  | -3.400544 |
| C  | -0.392383 | 3.607591  | -2.018148 |
| H  | 0.460974  | 2.999992  | -2.342444 |
| C  | 0.072817  | 5.062116  | -1.884309 |
| H  | 0.452373  | 5.434962  | -2.839585 |
| H  | -0.746896 | 5.723886  | -1.583066 |
| H  | 0.871399  | 5.162378  | -1.140052 |
| C  | -1.485845 | 3.442364  | -3.076805 |
| H  | -1.733458 | 2.387735  | -3.220237 |
| H  | -2.400269 | 3.984524  | -2.811017 |
| H  | -1.143085 | 3.832693  | -4.038736 |
| C  | 0.125490  | -3.438415 | -2.110451 |
| H  | 0.684081  | -2.718987 | -2.720540 |
| C  | -0.445430 | -4.503781 | -3.054148 |
| H  | 0.362000  | -5.025061 | -3.575247 |
| H  | -1.021215 | -5.260834 | -2.509501 |
| H  | -1.099952 | -4.059068 | -3.810712 |
| C  | 1.070585  | -4.041953 | -1.066501 |
| H  | 1.469771  | -3.272624 | -0.400133 |
| H  | 0.569006  | -4.798255 | -0.452985 |
| H  | 1.913307  | -4.536759 | -1.557177 |
| C  | 3.449669  | 0.055374  | -0.021010 |
| C  | 4.532742  | -0.576828 | 0.755520  |
| C  | 5.714492  | 0.117939  | 1.054605  |
| C  | 4.387861  | -1.894474 | 1.222564  |
| C  | 6.715729  | -0.482963 | 1.813238  |
| H  | 5.841335  | 1.133420  | 0.694859  |
| C  | 5.397521  | -2.497691 | 1.969943  |
| H  | 3.476126  | -2.442216 | 1.004066  |
| C  | 6.564544  | -1.793967 | 2.269967  |
| H  | 7.622730  | 0.069440  | 2.038025  |
| H  | 5.269935  | -3.516516 | 2.322702  |
| H  | 7.351224  | -2.263569 | 2.851476  |
| C  | 2.801936  | 1.227945  | 0.338976  |
| O  | 1.721396  | 1.643737  | -0.258212 |
| O  | 3.352437  | 1.999797  | 1.294200  |
| C  | 2.735149  | 3.268977  | 1.543628  |
| H  | 2.741153  | 3.898011  | 0.648310  |
| H  | 1.706542  | 3.136813  | 1.887998  |
| H  | 3.338272  | 3.731456  | 2.323858  |
| C  | 3.293378  | -1.576872 | -1.778202 |
| H  | 2.538893  | -1.943495 | -2.467739 |
| H  | 4.012239  | -0.955927 | -2.322762 |
| O  | 2.602949  | -0.803633 | -0.777435 |
| H  | 3.687659  | 1.092179  | -1.622647 |
| H  | 2.760511  | 2.292837  | -1.932482 |
| O  | 3.321345  | 1.646944  | -2.416521 |
| H  | 3.830812  | -2.404124 | -1.312739 |
| H  | 2.575181  | 1.072038  | -2.910315 |

---

TS(A-E)



```

-----
Number of imaginary frequencies: 1   Electronic energy:   HF=-2583.2864235
Zero-point correction=              0.784716 (Hartree/Particle)
Thermal correction to Energy=       0.832892
Thermal correction to Enthalpy=     0.833836
Thermal correction to Gibbs Free Energy= 0.700336
Sum of electronic and zero-point Energies= -2582.501708
Sum of electronic and thermal Energies= -2582.453531
Sum of electronic and thermal Enthalpies= -2582.452587
Sum of electronic and thermal Free Energies= -2582.586088

```

.....  
Cartesian Coordinates

```

-----
C      -2.626202  -1.492250  -1.221937
C      -1.691389  -0.564779  -1.710624
C      -0.686587  -0.992177  -2.592615
C      -0.628288  -2.329357  -2.987788
C      -1.550985  -3.257850  -2.496510
C      -2.541848  -2.834289  -1.611501
H       0.036796  -0.270786  -2.960347
H      -1.498182  -4.297963  -2.805218
C      -1.707046  0.849619  -1.293648
C      -3.768183  -1.281428  -0.237560
C      -4.109924  -2.743448  0.203950
H      -5.174791  -2.851187  0.421684
H      -3.556545  -2.992404  1.108617
C      -3.638414  -3.645577  -0.960014
O      -2.830849  1.539277  -1.500214
C      -1.177606  2.888123  -0.471978
N      -0.732328  1.489928  -0.733452
C      -3.429890  -0.346284  0.912892
C      -2.229094  -0.236607  1.630689
C      -2.076555  0.798892  2.566177
C      -3.127680  1.683116  2.808229
C      -4.336905  1.554521  2.117056
C      -4.474181  0.550320  1.159057
H      -1.136332  0.910957  3.092244
H      -5.153764  2.243425  2.312408
C      -1.126432  -1.201998  1.461479
C      -5.014820  -0.583988  -0.882272
H      -5.704478  -1.318204  -1.304864
H      -4.690087  0.074710  -1.687554
C      -5.645954  0.258665  0.250082
O      -1.407066  -2.477549  1.759271
C       0.878868  -2.206176  1.248725
H       1.407454  -2.397494  0.314600
N       0.092698  -0.956403  1.105679
C      -0.220740  -3.265909  1.454319
H      -0.437066  -3.836461  0.547540
H      -0.050964  -3.942713  2.291261
C      -2.666412  2.849218  -0.875208
H      -3.340792  2.880242  -0.018991
H      -2.956756  3.598772  -1.610762
H      -2.999477  2.474181  3.539574
H      -4.445449  -3.822609  -1.682272
H      -3.297856  -4.628416  -0.620788

```

|    |           |           |           |
|----|-----------|-----------|-----------|
| H  | -6.409745 | -0.310625 | 0.794874  |
| H  | -6.131935 | 1.164979  | -0.122613 |
| H  | 0.137274  | -2.645057 | -3.689805 |
| H  | -1.072150 | 3.065469  | 0.599515  |
| Fe | 0.917792  | 0.808300  | 0.354951  |
| Cl | 1.080258  | 2.314473  | 2.058363  |
| C  | 2.846387  | 0.280033  | 0.017567  |
| C  | 3.451177  | -0.738988 | -0.771306 |
| C  | 2.638626  | -1.551802 | -1.604787 |
| C  | 4.848103  | -1.002026 | -0.727390 |
| C  | 3.189697  | -2.581358 | -2.348060 |
| H  | 1.580170  | -1.338028 | -1.662216 |
| C  | 5.395624  | -2.037810 | -1.468298 |
| H  | 5.485494  | -0.393742 | -0.095065 |
| C  | 4.568282  | -2.825992 | -2.278679 |
| H  | 2.559373  | -3.195782 | -2.982016 |
| H  | 6.460774  | -2.237439 | -1.423977 |
| H  | 5.001018  | -3.634090 | -2.860503 |
| C  | 3.758522  | 1.226225  | 0.690381  |
| O  | 4.057801  | 2.250122  | 0.100127  |
| O  | 4.140326  | 0.879745  | 1.915549  |
| C  | 4.797448  | 1.917118  | 2.689181  |
| H  | 4.088781  | 2.728182  | 2.865024  |
| H  | 5.081200  | 1.439298  | 3.624496  |
| H  | 5.674305  | 2.288941  | 2.157735  |
| C  | 1.920091  | -2.074422 | 2.374969  |
| H  | 2.523024  | -1.192812 | 2.123666  |
| C  | 2.849154  | -3.293180 | 2.374992  |
| H  | 3.636377  | -3.175159 | 3.124333  |
| H  | 2.308623  | -4.216347 | 2.614326  |
| H  | 3.329861  | -3.427216 | 1.399412  |
| C  | 1.287864  | -1.817625 | 3.745949  |
| H  | 0.684948  | -0.905753 | 3.740019  |
| H  | 0.654505  | -2.650993 | 4.070087  |
| H  | 2.068133  | -1.690071 | 4.501039  |
| C  | -0.302507 | 3.912874  | -1.216551 |
| H  | 0.733306  | 3.670613  | -0.935601 |
| C  | -0.592204 | 5.325351  | -0.696062 |
| H  | 0.053302  | 6.058170  | -1.187564 |
| H  | -1.629967 | 5.617335  | -0.896167 |
| H  | -0.419417 | 5.389947  | 0.382174  |
| C  | -0.445255 | 3.838680  | -2.743636 |
| H  | -0.342579 | 2.819993  | -3.132247 |
| H  | -1.419397 | 4.213705  | -3.073147 |
| H  | 0.312596  | 4.461958  | -3.227202 |
| O  | 1.716910  | 1.262646  | -2.570258 |
| C  | 2.989955  | 1.568186  | -3.152354 |
| H  | 2.881638  | 2.219337  | -4.027362 |
| H  | 3.658437  | 2.033879  | -2.420963 |
| H  | 3.422005  | 0.619821  | -3.476971 |
| H  | 1.293601  | 2.093282  | -2.324193 |

---

**E**

---

Number of imaginary frequencies: 0    Electronic energy:    HF=-2583.2938146  
Zero-point correction=                      0.786076 (Hartree/Particle)

|                                              |              |
|----------------------------------------------|--------------|
| Thermal correction to Energy=                | 0.834123     |
| Thermal correction to Enthalpy=              | 0.835067     |
| Thermal correction to Gibbs Free Energy=     | 0.703105     |
| Sum of electronic and zero-point Energies=   | -2582.507738 |
| Sum of electronic and thermal Energies=      | -2582.459692 |
| Sum of electronic and thermal Enthalpies=    | -2582.458748 |
| Sum of electronic and thermal Free Energies= | -2582.590710 |

.....  
Cartesian Coordinates  
.....

|   |           |           |           |
|---|-----------|-----------|-----------|
| C | -2.634869 | -1.536663 | -1.192266 |
| C | -1.746131 | -0.556680 | -1.664675 |
| C | -0.768692 | -0.912646 | -2.607691 |
| C | -0.678230 | -2.222442 | -3.074753 |
| C | -1.554855 | -3.202331 | -2.596648 |
| C | -2.523748 | -2.854137 | -1.656848 |
| H | -0.105709 | -0.142721 | -2.989215 |
| H | -1.482179 | -4.223975 | -2.958093 |
| C | -1.780212 | 0.833328  | -1.182248 |
| C | -3.730543 | -1.423693 | -0.139762 |
| C | -3.988477 | -2.920492 | 0.241335  |
| H | -5.033177 | -3.083255 | 0.515166  |
| H | -3.370344 | -3.193724 | 1.095199  |
| C | -3.557892 | -3.737503 | -0.998162 |
| O | -2.972603 | 1.436362  | -1.173313 |
| C | -1.276868 | 2.912589  | -0.476546 |
| N | -0.769812 | 1.531420  | -0.773615 |
| C | -3.378227 | -0.535264 | 1.043218  |
| C | -2.134410 | -0.359097 | 1.667514  |
| C | -1.995831 | 0.616131  | 2.667401  |
| C | -3.101980 | 1.366248  | 3.066789  |
| C | -4.348564 | 1.174757  | 2.460042  |
| C | -4.473099 | 0.241882  | 1.431083  |
| H | -1.026466 | 0.780763  | 3.122131  |
| H | -5.203459 | 1.768371  | 2.770859  |
| C | -0.993212 | -1.234524 | 1.345229  |
| C | -5.049240 | -0.762977 | -0.666750 |
| H | -5.708985 | -1.503564 | -1.125000 |
| H | -4.808547 | -0.011466 | -1.418085 |
| C | -5.675001 | -0.076134 | 0.570308  |
| O | -1.217827 | -2.544591 | 1.554209  |
| C | 1.006335  | -2.158294 | 0.921784  |
| H | 1.504840  | -2.249332 | -0.043007 |
| N | 0.186105  | -0.916559 | 0.925155  |
| C | -0.053969 | -3.262086 | 1.066928  |
| H | -0.326745 | -3.717960 | 0.111268  |
| H | 0.189809  | -4.034998 | 1.795255  |
| C | -2.799764 | 2.698390  | -0.460154 |
| H | -3.209465 | 2.560314  | 0.540821  |
| H | -3.366713 | 3.455352  | -0.999435 |
| H | -2.987165 | 2.108271  | 3.849942  |
| H | -4.398802 | -3.896461 | -1.685221 |
| H | -3.169917 | -4.727156 | -0.739507 |
| H | -6.353423 | -0.754402 | 1.103378  |
| H | -6.256265 | 0.812205  | 0.307187  |
| H | 0.065794  | -2.478527 | -3.822558 |

|    |           |           |           |
|----|-----------|-----------|-----------|
| H  | -0.907468 | 3.196478  | 0.510413  |
| Fe | 1.040123  | 0.951277  | 0.208603  |
| Cl | 1.149282  | 2.205161  | 2.106303  |
| C  | 2.959427  | 0.265284  | -0.010230 |
| C  | 3.563899  | -0.646902 | -0.920960 |
| C  | 2.758032  | -1.277186 | -1.908150 |
| C  | 4.945232  | -0.985455 | -0.864215 |
| C  | 3.300524  | -2.194318 | -2.791846 |
| H  | 1.704741  | -1.026956 | -1.956155 |
| C  | 5.481261  | -1.914486 | -1.741783 |
| H  | 5.575175  | -0.525336 | -0.110774 |
| C  | 4.662194  | -2.515654 | -2.706792 |
| H  | 2.676719  | -2.666869 | -3.542962 |
| H  | 6.532747  | -2.174553 | -1.685786 |
| H  | 5.087724  | -3.238992 | -3.395423 |
| C  | 3.869820  | 1.088204  | 0.814656  |
| O  | 4.190129  | 2.202261  | 0.411414  |
| O  | 4.246427  | 0.560004  | 1.969195  |
| C  | 4.904624  | 1.465855  | 2.896540  |
| H  | 4.217011  | 2.274908  | 3.147434  |
| H  | 5.131408  | 0.858925  | 3.770293  |
| H  | 5.814872  | 1.866933  | 2.449590  |
| C  | 2.077347  | -2.120453 | 2.025867  |
| H  | 2.651385  | -1.202597 | 1.861522  |
| C  | 3.038187  | -3.303643 | 1.870002  |
| H  | 3.845372  | -3.240836 | 2.604781  |
| H  | 2.531758  | -4.263327 | 2.024931  |
| H  | 3.491461  | -3.320527 | 0.872298  |
| C  | 1.484631  | -2.025022 | 3.434975  |
| H  | 0.862725  | -1.132584 | 3.542145  |
| H  | 0.880036  | -2.902567 | 3.689193  |
| H  | 2.287195  | -1.957513 | 4.174484  |
| C  | -0.804481 | 3.957782  | -1.506508 |
| H  | 0.285474  | 3.936082  | -1.470081 |
| C  | -1.257299 | 5.357151  | -1.068372 |
| H  | -0.854373 | 6.115783  | -1.745266 |
| H  | -2.348410 | 5.461259  | -1.081003 |
| H  | -0.906978 | 5.589674  | -0.057559 |
| C  | -1.260236 | 3.640507  | -2.935434 |
| H  | -0.951051 | 2.638642  | -3.249988 |
| H  | -2.348694 | 3.700779  | -3.044141 |
| H  | -0.826796 | 4.357016  | -3.639058 |
| O  | 1.988425  | 2.621983  | -1.139944 |
| C  | 2.259705  | 2.397022  | -2.524838 |
| H  | 2.648808  | 3.305543  | -2.994510 |
| H  | 2.974644  | 1.579625  | -2.671005 |
| H  | 1.312613  | 2.135168  | -2.998848 |
| H  | 2.835050  | 2.772718  | -0.667956 |

---

**TS(E-B)**

---

Number of imaginary frequencies: 1    Electronic energy:    HF=-2583.2941833  
Zero-point correction=                    0.785384 (Hartree/Particle)  
Thermal correction to Energy=            0.832925  
Thermal correction to Enthalpy=         0.833869  
Thermal correction to Gibbs Free Energy= 0.702379

|                                              |              |
|----------------------------------------------|--------------|
| Sum of electronic and zero-point Energies=   | -2582.508799 |
| Sum of electronic and thermal Energies=      | -2582.461258 |
| Sum of electronic and thermal Enthalpies=    | -2582.460314 |
| Sum of electronic and thermal Free Energies= | -2582.591804 |

.....  
Cartesian Coordinates  
.....

|   |           |           |           |
|---|-----------|-----------|-----------|
| C | -2.961013 | 0.073800  | 1.587290  |
| C | -1.621815 | -0.311945 | 1.751387  |
| C | -0.810904 | 0.397023  | 2.651592  |
| C | -1.341698 | 1.451131  | 3.394709  |
| C | -2.678696 | 1.831347  | 3.235628  |
| C | -3.476502 | 1.149160  | 2.319927  |
| H | 0.223155  | 0.098479  | 2.778324  |
| H | -3.084691 | 2.656576  | 3.813475  |
| C | -1.042345 | -1.455871 | 1.017797  |
| C | -3.993734 | -0.462731 | 0.608903  |
| C | -5.059840 | 0.682888  | 0.579346  |
| H | -6.063442 | 0.285055  | 0.413011  |
| H | -4.832677 | 1.375678  | -0.229856 |
| C | -4.916225 | 1.406640  | 1.938710  |
| O | -1.659307 | -2.635805 | 1.189463  |
| C | 0.253992  | -2.854342 | -0.174641 |
| N | -0.001214 | -1.454473 | 0.257404  |
| C | -3.412893 | -0.814717 | -0.751637 |
| C | -2.405325 | -0.156476 | -1.477267 |
| C | -1.921164 | -0.738255 | -2.660354 |
| C | -2.453176 | -1.940839 | -3.122322 |
| C | -3.467221 | -2.587149 | -2.408664 |
| C | -3.931355 | -2.026199 | -1.218989 |
| H | -1.122600 | -0.251637 | -3.206217 |
| H | -3.876896 | -3.526253 | -2.769766 |
| C | -1.819608 | 1.119840  | -1.037725 |
| C | -4.647035 | -1.813727 | 1.057668  |
| H | -5.532234 | -1.640200 | 1.673975  |
| H | -3.933013 | -2.388696 | 1.646380  |
| C | -4.961562 | -2.568179 | -0.254687 |
| O | -2.674486 | 2.104022  | -0.721368 |
| C | -0.462749 | 2.880667  | -0.704626 |
| H | 0.283475  | 3.053515  | 0.074222  |
| N | -0.559934 | 1.418171  | -0.965971 |
| C | -1.875068 | 3.201489  | -0.191465 |
| H | -1.956347 | 3.164563  | 0.897703  |
| H | -2.298638 | 4.129924  | -0.571778 |
| C | -1.019776 | -3.587398 | 0.290739  |
| H | -1.718805 | -3.781910 | -0.525195 |
| H | -0.838405 | -4.500783 | 0.856973  |
| H | -2.068240 | -2.375074 | -4.038859 |
| H | -5.584977 | 0.975017  | 2.694368  |
| H | -5.154211 | 2.472534  | 1.876735  |
| H | -5.971860 | -2.337758 | -0.616249 |
| H | -4.906488 | -3.654530 | -0.138645 |
| H | -0.718017 | 1.974100  | 4.111448  |
| H | 0.332361  | -2.858313 | -1.263725 |
| C | -0.048686 | 3.646173  | -1.980276 |
| H | 0.884767  | 3.180206  | -2.308390 |

|    |           |           |           |
|----|-----------|-----------|-----------|
| C  | 0.238561  | 5.113109  | -1.636561 |
| H  | 0.606081  | 5.648905  | -2.516145 |
| H  | -0.662619 | 5.635045  | -1.294365 |
| H  | 0.994162  | 5.200190  | -0.847837 |
| C  | -1.064313 | 3.516740  | -3.120784 |
| H  | -1.233646 | 2.471577  | -3.393806 |
| H  | -2.030908 | 3.965741  | -2.868417 |
| H  | -0.691336 | 4.030433  | -4.011233 |
| C  | 1.576284  | -3.379827 | 0.414655  |
| H  | 2.353525  | -2.711010 | 0.032105  |
| C  | 1.874402  | -4.786594 | -0.115637 |
| H  | 2.859669  | -5.122700 | 0.220077  |
| H  | 1.143807  | -5.519679 | 0.244337  |
| H  | 1.864013  | -4.808632 | -1.210201 |
| C  | 1.618889  | -3.314920 | 1.944221  |
| H  | 1.485505  | -2.290068 | 2.302741  |
| H  | 0.843759  | -3.938885 | 2.402787  |
| H  | 2.584044  | -3.674664 | 2.312722  |
| Fe | 1.059220  | 0.102446  | -0.776599 |
| C  | 2.726903  | 0.389503  | 0.554879  |
| C  | 4.013882  | -0.195548 | 0.433999  |
| C  | 4.260939  | -1.148759 | -0.596686 |
| C  | 5.089955  | 0.145468  | 1.309199  |
| C  | 5.506724  | -1.740411 | -0.727941 |
| H  | 3.468889  | -1.368359 | -1.304904 |
| C  | 6.323937  | -0.465538 | 1.183279  |
| H  | 4.927680  | 0.868989  | 2.099971  |
| C  | 6.532596  | -1.408268 | 0.164729  |
| H  | 5.686010  | -2.456505 | -1.522564 |
| H  | 7.131014  | -0.213898 | 1.862714  |
| H  | 7.505802  | -1.879386 | 0.064626  |
| C  | 2.560455  | 1.475640  | 1.541063  |
| O  | 2.455971  | 2.663538  | 1.243107  |
| O  | 2.469348  | 1.017885  | 2.793387  |
| C  | 2.238762  | 2.018285  | 3.818048  |
| H  | 1.402176  | 2.657369  | 3.536517  |
| H  | 2.021190  | 1.454534  | 4.723015  |
| H  | 3.135144  | 2.627460  | 3.947558  |
| O  | 2.559074  | 1.927997  | -1.292683 |
| C  | 3.690828  | 1.879527  | -2.167727 |
| H  | 3.837890  | 2.854836  | -2.641678 |
| H  | 4.600103  | 1.595704  | -1.625308 |
| H  | 3.464116  | 1.128078  | -2.922770 |
| H  | 2.672213  | 2.579970  | -0.571036 |
| Cl | 1.556857  | -0.914149 | -2.789954 |

---

**(R)-TS(D<sub>r</sub>-P)<sub>3w</sub>**

---

Number of imaginary frequencies: 1    Electronic energy:    HF=-2812.6676872  
Zero-point correction=                    0.859867 (Hartree/Particle)  
Thermal correction to Energy=            0.912872  
Thermal correction to Enthalpy=        0.913816  
Thermal correction to Gibbs Free Energy= 0.772550  
Sum of electronic and zero-point Energies= -2811.807820

Sum of electronic and thermal Energies= -2811.754815  
Sum of electronic and thermal Enthalpies= -2811.753871  
Sum of electronic and thermal Free Energies= -2811.895138

.....  
Cartesian Coordinates

.....  
C 2.075218 -0.930431 -2.073977  
C 1.018972 -1.383188 -1.268887  
C -0.288587 -1.385703 -1.776863  
C -0.537831 -0.948123 -3.078006  
C 0.511025 -0.484945 -3.878165  
C 1.811537 -0.478161 -3.371548  
H -1.099552 -1.762374 -1.164808  
H 0.315495 -0.142478 -4.890416  
C 1.239685 -1.746221 0.141029  
C 3.560373 -0.840715 -1.752790  
C 4.083001 0.115993 -2.874431  
H 5.114549 -0.118346 -3.147099  
H 4.059449 1.145052 -2.515232  
C 3.093040 -0.050623 -4.050875  
O 2.117627 -2.707362 0.428941  
C 1.240811 -1.698614 2.396774  
N 0.678732 -1.148508 1.138108  
C 3.896721 -0.385576 -0.339242  
C 3.285646 0.610208 0.434446  
C 3.682579 0.787757 1.769198  
C 4.706900 0.008003 2.307221  
C 5.343438 -0.960803 1.524011  
C 4.920477 -1.164802 0.211529  
H 3.203148 1.554245 2.369102  
H 6.148508 -1.558318 1.941751  
C 2.341528 1.588679 -0.146406  
C 4.264622 -2.239193 -1.824840  
H 4.605272 -2.461239 -2.838794  
H 3.557903 -3.015738 -1.529377  
C 5.415232 -2.176121 -0.796066  
O 2.925470 2.454949 -0.998429  
C 0.678104 3.023123 -0.594478  
H -0.207421 2.803195 -1.190459  
N 1.090918 1.771547 0.099114  
C 1.881971 3.324074 -1.507903  
H 1.705770 3.052689 -2.552437  
H 2.249681 4.348631 -1.452364  
C 2.257155 -2.748233 1.882738  
H 3.291352 -2.497334 2.113468  
H 2.038227 -3.768335 2.198258  
H 5.014674 0.164036 3.336026  
H 3.422846 -0.834537 -4.744412  
H 2.980611 0.864125 -4.640674  
H 6.345968 -1.820561 -1.256129  
H 5.633345 -3.150645 -0.350013

|    |           |           |           |
|----|-----------|-----------|-----------|
| H  | -1.553371 | -0.974686 | -3.458909 |
| H  | 1.764668  | -0.879094 | 2.898060  |
| Fe | -0.518365 | 0.552082  | 0.949090  |
| Cl | -1.071462 | 1.662306  | 2.930226  |
| C  | 0.331711  | 4.126117  | 0.427597  |
| H  | -0.512425 | 3.741443  | 1.011997  |
| C  | -0.110248 | 5.402967  | -0.301794 |
| H  | -0.520596 | 6.129912  | 0.406059  |
| H  | 0.728244  | 5.895147  | -0.805376 |
| H  | -0.866124 | 5.200701  | -1.071581 |
| C  | 1.468389  | 4.404535  | 1.414740  |
| H  | 1.677712  | 3.521051  | 2.021588  |
| H  | 2.389425  | 4.708638  | 0.904454  |
| H  | 1.188641  | 5.212307  | 2.096401  |
| C  | 0.165343  | -2.243224 | 3.348696  |
| H  | -0.491146 | -1.390966 | 3.561267  |
| C  | 0.804926  | -2.677882 | 4.672933  |
| H  | 0.037112  | -2.999952 | 5.381506  |
| H  | 1.491509  | -3.520855 | 4.532455  |
| H  | 1.363950  | -1.857676 | 5.134619  |
| C  | -0.658926 | -3.367930 | 2.714809  |
| H  | -1.069185 | -3.058715 | 1.750357  |
| H  | -0.060580 | -4.271290 | 2.556352  |
| H  | -1.492251 | -3.648302 | 3.365118  |
| C  | -3.291287 | -0.460472 | -0.134299 |
| C  | -3.888153 | -1.675073 | -0.767046 |
| C  | -4.957024 | -1.570735 | -1.672171 |
| C  | -3.404746 | -2.953862 | -0.448659 |
| C  | -5.500925 | -2.708684 | -2.262697 |
| H  | -5.355363 | -0.594200 | -1.923809 |
| C  | -3.958654 | -4.091968 | -1.034601 |
| H  | -2.592286 | -3.055459 | 0.260962  |
| C  | -5.005946 | -3.975718 | -1.947145 |
| H  | -6.322984 | -2.605742 | -2.964305 |
| H  | -3.567967 | -5.071140 | -0.774906 |
| H  | -5.438101 | -4.860996 | -2.401979 |
| C  | -2.734832 | 0.585988  | -0.923385 |
| O  | -1.800837 | 1.347999  | -0.508979 |
| O  | -3.295171 | 0.808775  | -2.112561 |
| C  | -2.781431 | 1.899964  | -2.901401 |
| H  | -2.987684 | 2.853317  | -2.410909 |
| H  | -1.708360 | 1.775856  | -3.061717 |
| H  | -3.316102 | 1.838903  | -3.847936 |
| C  | -3.125548 | -1.029604 | 2.199723  |
| H  | -2.378717 | -1.358566 | 2.914199  |
| H  | -3.625375 | -0.144352 | 2.592393  |
| O  | -2.424826 | -0.727484 | 0.976949  |
| H  | -2.416232 | 3.036017  | -0.219737 |
| H  | -4.458932 | 0.339522  | 0.440001  |
| O  | -3.046666 | 3.762750  | -0.039247 |
| H  | -2.526825 | 4.574495  | 0.008323  |



|   |           |           |          |
|---|-----------|-----------|----------|
| H | -4.717786 | 1.713402  | 1.594747 |
| O | -5.249088 | 0.904114  | 1.049716 |
| H | -5.949612 | 1.259104  | 0.483776 |
| O | -3.989699 | 2.655508  | 2.179613 |
| H | -3.177243 | 2.307646  | 2.608347 |
| H | -3.657593 | 3.233396  | 1.443936 |
| H | -3.853536 | -1.824333 | 2.022477 |

---

**(S)-TS(D<sub>r</sub>-P)<sub>3w</sub>**

---

Number of imaginary frequencies: 1    Electronic energy:    HF=-2812.6724125  
Zero-point correction=                    0.860019 (Hartree/Particle)  
Thermal correction to Energy=            0.912522  
Thermal correction to Enthalpy=         0.913466  
Thermal correction to Gibbs Free Energy= 0.773535  
Sum of electronic and zero-point Energies= -2811.812394  
Sum of electronic and thermal Energies= -2811.759891  
Sum of electronic and thermal Enthalpies= -2811.758947  
Sum of electronic and thermal Free Energies= -2811.898878

.....  
Cartesian Coordinates

.....

|   |          |           |           |
|---|----------|-----------|-----------|
| C | 2.829273 | -1.465265 | 1.581709  |
| C | 1.972362 | -0.364686 | 1.745018  |
| C | 0.855429 | -0.483130 | 2.587756  |
| C | 0.623731 | -1.664534 | 3.289345  |
| C | 1.493319 | -2.752476 | 3.148237  |
| C | 2.579979 | -2.651773 | 2.281078  |
| H | 0.177270 | 0.356816  | 2.673324  |
| H | 1.308688 | -3.673660 | 3.693402  |
| C | 2.189851 | 0.906707  | 1.029941  |
| C | 3.992126 | -1.635891 | 0.613212  |
| C | 4.171854 | -3.191008 | 0.568635  |
| H | 5.219983 | -3.462814 | 0.425297  |
| H | 3.599879 | -3.605295 | -0.260100 |
| C | 3.595103 | -3.707551 | 1.907968  |
| O | 3.407890 | 1.455423  | 1.139657  |
| C | 1.979756 | 2.783240  | -0.194122 |
| N | 1.330349 | 1.543981  | 0.307531  |
| C | 3.738719 | -0.989075 | -0.742504 |
| C | 2.535738 | -0.893495 | -1.463119 |
| C | 2.482267 | -0.084271 | -2.611767 |
| C | 3.626290 | 0.571926  | -3.061359 |
| C | 4.833504 | 0.446486  | -2.364484 |
| C | 4.876438 | -0.314978 | -1.196709 |
| H | 1.544030 | 0.021270  | -3.145132 |
| H | 5.722821 | 0.960776  | -2.717562 |
| C | 1.318236 | -1.613093 | -1.066364 |
| C | 5.319877 | -0.943511 | 1.072257  |
| H | 5.926493 | -1.616764 | 1.682180  |
| H | 5.088362 | -0.062550 | 1.669552  |

|    |           |           |           |
|----|-----------|-----------|-----------|
| C  | 6.025529  | -0.511801 | -0.234539 |
| O  | 1.451667  | -2.911145 | -0.764046 |
| C  | -0.808000 | -2.301985 | -0.829262 |
| H  | -1.568922 | -2.033073 | -0.096841 |
| N  | 0.109347  | -1.142983 | -1.030599 |
| C  | 0.152302  | -3.365119 | -0.280078 |
| H  | 0.202848  | -3.381104 | 0.811308  |
| H  | -0.009165 | -4.369531 | -0.668160 |
| C  | 3.448946  | 2.599656  | 0.237342  |
| H  | 4.107739  | 2.334251  | -0.590583 |
| H  | 3.867706  | 3.438670  | 0.792935  |
| H  | 3.574453  | 1.183851  | -3.955661 |
| H  | 4.372290  | -3.768248 | 2.680446  |
| H  | 3.156175  | -4.705655 | 1.820812  |
| H  | 6.695505  | -1.297919 | -0.605438 |
| H  | 6.632889  | 0.388927  | -0.107370 |
| H  | -0.235661 | -1.739885 | 3.948387  |
| H  | 1.885749  | 2.788252  | -1.281062 |
| Fe | -0.485314 | 0.808518  | -0.558148 |
| Cl | -0.550350 | 2.342508  | -2.377732 |
| C  | -1.506359 | -2.694406 | -2.147991 |
| H  | -1.997292 | -1.786560 | -2.501952 |
| C  | -2.591903 | -3.743296 | -1.876118 |
| H  | -3.131081 | -3.979929 | -2.797670 |
| H  | -2.163995 | -4.681823 | -1.504309 |
| H  | -3.317956 | -3.386854 | -1.140070 |
| C  | -0.533018 | -3.151027 | -3.241198 |
| H  | 0.215444  | -2.386034 | -3.466847 |
| H  | -0.007422 | -4.072415 | -2.969331 |
| H  | -1.082083 | -3.352946 | -4.165064 |
| C  | 1.289001  | 4.044638  | 0.351880  |
| H  | 0.244446  | 3.963360  | 0.033296  |
| C  | 1.879862  | 5.297833  | -0.303391 |
| H  | 1.345457  | 6.194910  | 0.022636  |
| H  | 2.934511  | 5.435198  | -0.038573 |
| H  | 1.806497  | 5.240649  | -1.393514 |
| C  | 1.329953  | 4.123482  | 1.882553  |
| H  | 0.863159  | 3.249031  | 2.347106  |
| H  | 2.354498  | 4.190704  | 2.262728  |
| H  | 0.818767  | 5.025507  | 2.239929  |
| C  | -3.483121 | 0.303745  | 0.168009  |
| C  | -4.469733 | -0.810927 | 0.320080  |
| C  | -5.694595 | -0.775457 | -0.360714 |
| C  | -4.167760 | -1.939096 | 1.100233  |
| C  | -6.584131 | -1.847534 | -0.283873 |
| H  | -5.953638 | 0.100109  | -0.948045 |
| C  | -5.060940 | -3.004448 | 1.190807  |
| H  | -3.231510 | -1.971559 | 1.650344  |
| C  | -6.268766 | -2.964250 | 0.490396  |
| H  | -7.526406 | -1.806042 | -0.820895 |
| H  | -4.815594 | -3.866457 | 1.803524  |

|   |           |           |           |
|---|-----------|-----------|-----------|
| H | -6.963265 | -3.795697 | 0.555505  |
| C | -2.726096 | 0.754172  | 1.275090  |
| O | -1.548097 | 1.253783  | 1.169025  |
| O | -3.337844 | 0.725984  | 2.459633  |
| C | -2.696803 | 1.360182  | 3.581369  |
| H | -2.598939 | 2.433984  | 3.407755  |
| H | -1.715008 | 0.920465  | 3.768897  |
| H | -3.357664 | 1.173673  | 4.426147  |
| C | -3.250638 | 0.348663  | -2.258320 |
| H | -2.452290 | 0.357091  | -2.997271 |
| H | -3.797860 | 1.291784  | -2.313732 |
| O | -2.613996 | 0.188795  | -0.978828 |
| H | -1.565197 | 3.023004  | 1.477528  |
| H | -4.252440 | 1.611462  | -0.090817 |
| O | -1.924930 | 3.934494  | 1.471065  |
| H | -1.236447 | 4.504680  | 1.833993  |
| H | -3.849380 | 3.264812  | -0.776538 |
| O | -4.718806 | 2.561242  | -0.502205 |
| H | -5.313276 | 2.961157  | 0.149192  |
| O | -2.830099 | 3.980928  | -1.010826 |
| H | -2.163091 | 3.519355  | -1.574345 |
| H | -2.399551 | 4.125571  | -0.126434 |
| H | -3.936052 | -0.483487 | -2.437943 |

---

**(R)-TS(D<sub>b</sub>-P)<sub>3w</sub>**

---

Number of imaginary frequencies: 1    Electronic energy:    HF=-2812.658333  
Zero-point correction=                    0.859348 (Hartree/Particle)  
Thermal correction to Energy=            0.912665  
Thermal correction to Enthalpy=         0.913609  
Thermal correction to Gibbs Free Energy= 0.769772  
Sum of electronic and zero-point Energies= -2811.798985  
Sum of electronic and thermal Energies= -2811.745668  
Sum of electronic and thermal Enthalpies= -2811.744724  
Sum of electronic and thermal Free Energies= -2811.888562

.....  
Cartesian Coordinates

.....

|   |           |           |           |
|---|-----------|-----------|-----------|
| C | 2.313226  | 1.839801  | -1.425415 |
| C | 1.314948  | 0.872185  | -1.617113 |
| C | -0.018572 | 1.278056  | -1.782088 |
| C | -0.340682 | 2.636376  | -1.780209 |
| C | 0.657152  | 3.602596  | -1.615190 |
| C | 1.979389  | 3.197429  | -1.430598 |
| H | -0.793145 | 0.535369  | -1.937530 |
| H | 0.401496  | 4.658564  | -1.618059 |
| C | 1.614324  | -0.575142 | -1.599156 |
| C | 3.781484  | 1.629858  | -1.085387 |
| C | 4.226527  | 3.046607  | -0.587364 |
| H | 5.255767  | 3.262449  | -0.882232 |
| H | 4.176079  | 3.086298  | 0.500218  |

|    |           |           |           |
|----|-----------|-----------|-----------|
| C  | 3.207514  | 4.044566  | -1.188920 |
| O  | 2.418622  | -1.062887 | -2.548700 |
| C  | 1.668761  | -2.776980 | -1.081763 |
| N  | 1.161814  | -1.428027 | -0.743425 |
| C  | 3.977869  | 0.518264  | -0.063600 |
| C  | 3.203848  | 0.227550  | 1.071533  |
| C  | 3.444950  | -0.958944 | 1.785094  |
| C  | 4.469978  | -1.818840 | 1.391023  |
| C  | 5.259573  | -1.514894 | 0.277633  |
| C  | 5.001641  | -0.352528 | -0.449470 |
| H  | 2.825447  | -1.206051 | 2.640718  |
| H  | 6.057093  | -2.187143 | -0.025843 |
| C  | 2.078113  | 1.073326  | 1.502746  |
| C  | 4.645432  | 1.137365  | -2.296319 |
| H  | 5.110029  | 1.977522  | -2.816941 |
| H  | 4.010498  | 0.612796  | -3.010024 |
| C  | 5.677900  | 0.149691  | -1.703980 |
| O  | 2.295956  | 2.372078  | 1.727093  |
| C  | 0.086041  | 1.769511  | 2.297316  |
| H  | -0.858263 | 1.852940  | 1.752892  |
| N  | 0.871431  | 0.654135  | 1.717717  |
| C  | 0.996514  | 2.979628  | 2.010583  |
| H  | 0.701231  | 3.532148  | 1.116574  |
| H  | 1.131048  | 3.658003  | 2.851814  |
| C  | 2.601097  | -2.487821 | -2.282388 |
| H  | 3.656470  | -2.640022 | -2.051706 |
| H  | 2.336605  | -3.023006 | -3.194745 |
| H  | 4.649366  | -2.727887 | 1.955465  |
| H  | 3.566506  | 4.459100  | -2.139412 |
| H  | 3.013628  | 4.894061  | -0.527265 |
| H  | 6.614803  | 0.657674  | -1.442529 |
| H  | 5.937372  | -0.654073 | -2.399307 |
| H  | -1.376174 | 2.935041  | -1.908988 |
| H  | 2.247747  | -3.136824 | -0.226119 |
| Fe | 0.120658  | -1.105661 | 0.985785  |
| Cl | 0.133016  | -2.717680 | 2.639096  |
| C  | -0.212456 | 1.506414  | 3.787915  |
| H  | -0.707000 | 0.529387  | 3.824501  |
| C  | -1.186633 | 2.562952  | 4.321888  |
| H  | -1.473327 | 2.336653  | 5.352527  |
| H  | -0.736200 | 3.562142  | 4.323821  |
| H  | -2.098599 | 2.610965  | 3.716646  |
| C  | 1.053220  | 1.405568  | 4.645872  |
| H  | 1.718210  | 0.615220  | 4.287599  |
| H  | 1.614078  | 2.346098  | 4.666253  |
| H  | 0.786429  | 1.164691  | 5.678375  |
| C  | 0.510740  | -3.759574 | -1.337508 |
| H  | -0.037004 | -3.827592 | -0.389129 |
| C  | 1.059693  | -5.155062 | -1.654432 |
| H  | 0.242357  | -5.876774 | -1.733246 |
| H  | 1.600556  | -5.171314 | -2.607794 |

|   |           |           |           |
|---|-----------|-----------|-----------|
| H | 1.740943  | -5.504776 | -0.871700 |
| C | -0.463707 | -3.257762 | -2.408004 |
| H | -0.912022 | -2.302979 | -2.122627 |
| H | 0.026383  | -3.134671 | -3.381213 |
| H | -1.271224 | -3.983289 | -2.544124 |
| C | -3.363329 | 0.037200  | -0.969575 |
| C | -4.186631 | 1.271271  | -1.157804 |
| C | -5.150604 | 1.691980  | -0.223975 |
| C | -4.040487 | 2.010942  | -2.342800 |
| C | -5.923387 | 2.826968  | -0.461413 |
| H | -5.274196 | 1.148973  | 0.706661  |
| C | -4.817560 | 3.145167  | -2.576658 |
| H | -3.309737 | 1.689007  | -3.075598 |
| C | -5.762692 | 3.560005  | -1.638604 |
| H | -6.656347 | 3.138454  | 0.276702  |
| H | -4.684151 | 3.703328  | -3.498410 |
| H | -6.369628 | 4.440371  | -1.822795 |
| C | -2.678032 | -0.266219 | 0.224232  |
| O | -1.770725 | -1.167810 | 0.296697  |
| O | -3.081131 | 0.363408  | 1.345522  |
| C | -3.033079 | -0.385842 | 2.581360  |
| H | -3.808398 | -1.157082 | 2.570602  |
| H | -2.061591 | -0.854763 | 2.738229  |
| H | -3.234806 | 0.339927  | 3.366954  |
| C | -3.460678 | -1.188698 | -3.017761 |
| H | -2.837222 | -1.359334 | -3.896677 |
| H | -3.731832 | -2.154420 | -2.575074 |
| O | -2.680572 | -0.407855 | -2.113247 |
| H | -2.166327 | -2.907301 | 0.465130  |
| H | -4.508516 | -0.964754 | -0.615057 |
| O | -2.426575 | -3.740892 | 0.908111  |
| H | -1.791217 | -3.784701 | 1.647160  |
| H | -5.225946 | -2.290625 | 0.405107  |
| O | -5.416950 | -1.613761 | -0.419866 |
| H | -6.159060 | -1.019904 | -0.230808 |
| O | -4.846080 | -3.098247 | 1.448834  |
| H | -5.406304 | -3.870747 | 1.600758  |
| H | -3.891495 | -3.433056 | 1.307101  |
| H | -4.372076 | -0.658724 | -3.317623 |

---

**(R)-TS(D<sub>c</sub>-P)<sub>3w</sub>**

---

Number of imaginary frequencies: 1    Electronic energy:    HF=-2812.6352195  
Zero-point correction=                    0.858594 (Hartree/Particle)  
Thermal correction to Energy=            0.912151  
Thermal correction to Enthalpy=         0.913096  
Thermal correction to Gibbs Free Energy= 0.767846  
Sum of electronic and zero-point Energies= -2811.776626  
Sum of electronic and thermal Energies= -2811.723068  
Sum of electronic and thermal Enthalpies= -2811.722124  
Sum of electronic and thermal Free Energies= -2811.867374

.....  
 Cartesian Coordinates  
 .....

|    |           |           |           |
|----|-----------|-----------|-----------|
| C  | -1.710971 | -1.986136 | -1.586200 |
| C  | -0.920438 | -0.822968 | -1.556890 |
| C  | 0.478195  | -0.943694 | -1.530778 |
| C  | 1.082154  | -2.200173 | -1.571922 |
| C  | 0.293877  | -3.353246 | -1.633119 |
| C  | -1.095174 | -3.241440 | -1.626180 |
| H  | 1.084763  | -0.046934 | -1.483344 |
| H  | 0.764358  | -4.332198 | -1.663108 |
| C  | -1.516683 | 0.521880  | -1.507397 |
| C  | -3.220396 | -2.126119 | -1.442596 |
| C  | -3.385074 | -3.633503 | -1.050114 |
| H  | -4.319361 | -4.043945 | -1.439916 |
| H  | -3.402482 | -3.729400 | 0.035198  |
| C  | -2.131134 | -4.341304 | -1.609891 |
| O  | -2.443630 | 0.808011  | -2.424432 |
| C  | -2.067583 | 2.660722  | -1.003664 |
| N  | -1.238829 | 1.468874  | -0.665068 |
| C  | -3.819877 | -1.168365 | -0.425331 |
| C  | -3.292394 | -0.750396 | 0.808166  |
| C  | -3.968540 | 0.235548  | 1.544408  |
| C  | -5.163092 | 0.773798  | 1.066398  |
| C  | -5.697093 | 0.344681  | -0.152465 |
| C  | -5.014390 | -0.616401 | -0.897791 |
| H  | -3.551759 | 0.586743  | 2.480045  |
| H  | -6.627567 | 0.767518  | -0.520751 |
| C  | -2.032490 | -1.299483 | 1.348376  |
| C  | -4.029380 | -1.797791 | -2.741636 |
| H  | -4.166610 | -2.689886 | -3.357146 |
| H  | -3.489940 | -1.060614 | -3.334846 |
| C  | -5.366110 | -1.193572 | -2.250223 |
| O  | -1.971967 | -2.622512 | 1.534390  |
| C  | 0.018290  | -1.567553 | 2.254682  |
| H  | 0.958876  | -1.455078 | 1.709882  |
| N  | -0.973766 | -0.630406 | 1.675453  |
| C  | -0.610519 | -2.942820 | 1.950551  |
| H  | -0.130171 | -3.450598 | 1.112274  |
| H  | -0.681688 | -3.611169 | 2.808354  |
| C  | -3.009997 | 2.110243  | -2.093338 |
| H  | -4.025157 | 1.935137  | -1.733306 |
| H  | -3.030563 | 2.697886  | -3.010697 |
| H  | -5.673350 | 1.533340  | 1.649150  |
| H  | -2.301252 | -4.710077 | -2.629601 |
| H  | -1.828109 | -5.202503 | -1.007215 |
| H  | -6.136748 | -1.966717 | -2.137370 |
| H  | -5.768069 | -0.445582 | -2.940138 |
| H  | 2.162081  | -2.276888 | -1.540680 |
| H  | -2.630949 | 2.936287  | -0.108269 |
| Fe | -0.606309 | 1.357822  | 1.279187  |

|    |           |           |           |
|----|-----------|-----------|-----------|
| Cl | -1.793623 | 2.682962  | 2.689927  |
| C  | 0.250270  | -1.255975 | 3.746703  |
| H  | 0.576356  | -0.208088 | 3.786385  |
| C  | 1.385440  | -2.126947 | 4.296877  |
| H  | 1.611187  | -1.858308 | 5.332427  |
| H  | 1.116685  | -3.189550 | 4.288516  |
| H  | 2.300717  | -2.007868 | 3.707592  |
| C  | -1.025510 | -1.367765 | 4.587275  |
| H  | -1.802498 | -0.691393 | 4.221731  |
| H  | -1.426234 | -2.387464 | 4.589195  |
| H  | -0.817375 | -1.099420 | 5.626603  |
| C  | -1.196105 | 3.857907  | -1.419092 |
| H  | -0.559641 | 4.068130  | -0.552633 |
| C  | -2.074526 | 5.089999  | -1.666196 |
| H  | -1.454605 | 5.967072  | -1.871843 |
| H  | -2.735059 | 4.951860  | -2.529890 |
| H  | -2.698034 | 5.315626  | -0.795127 |
| C  | -0.289756 | 3.543415  | -2.612606 |
| H  | 0.367517  | 2.696065  | -2.399865 |
| H  | -0.867452 | 3.312591  | -3.514703 |
| H  | 0.341075  | 4.405754  | -2.848099 |
| C  | 3.446762  | -0.015620 | -0.002223 |
| C  | 3.948526  | -0.330155 | -1.303245 |
| O  | 4.254558  | -1.485481 | -1.675296 |
| O  | 4.215307  | 0.744909  | -2.100474 |
| C  | 4.732831  | 0.451541  | -3.411149 |
| H  | 5.741453  | 0.035892  | -3.349665 |
| H  | 4.084424  | -0.256585 | -3.930904 |
| H  | 4.750601  | 1.406953  | -3.934610 |
| C  | 4.264524  | -1.786960 | 1.366073  |
| H  | 3.893987  | -2.676809 | 1.880446  |
| H  | 4.989068  | -2.097017 | 0.604239  |
| O  | 3.140046  | -1.152880 | 0.774382  |
| H  | 5.798098  | -1.816831 | -1.937085 |
| H  | 4.954727  | 0.641692  | 0.436592  |
| O  | 6.799760  | -1.847598 | -1.941671 |
| H  | 7.076100  | -2.750864 | -2.135136 |
| H  | 6.757379  | 0.313568  | 0.334708  |
| O  | 5.903092  | 1.055026  | 0.664844  |
| H  | 5.962828  | 1.902981  | 0.200865  |
| O  | 7.627560  | -0.477693 | -0.014077 |
| H  | 7.975639  | -1.005585 | 0.715591  |
| H  | 7.343219  | -1.098619 | -0.794062 |
| H  | 4.754697  | -1.130151 | 2.099172  |
| C  | 1.492544  | 2.353737  | 2.189079  |
| C  | 1.402065  | 3.517172  | 1.406480  |
| C  | 2.109061  | 1.200528  | 1.685478  |
| H  | 1.110030  | 2.357408  | 3.205563  |
| C  | 1.960879  | 3.498947  | 0.127200  |
| H  | 0.907330  | 4.398252  | 1.797449  |
| C  | 2.702861  | 1.179631  | 0.395151  |

|   |          |          |           |
|---|----------|----------|-----------|
| H | 2.214634 | 0.328776 | 2.315443  |
| C | 2.593868 | 2.362893 | -0.374442 |
| H | 1.903449 | 4.384161 | -0.498322 |
| H | 3.019895 | 2.389638 | -1.367197 |

**Cartesian coordinates of solvent optimization geometries**

**(R)-TS(D<sub>r</sub>-P)<sub>3w</sub>**

Number of imaginary frequencies: 1    Electronic energy:    HF=-2812.7531036  
Zero-point correction=                    0.859689 (Hartree/Particle)  
Thermal correction to Energy=            0.912231  
Thermal correction to Enthalpy=         0.913175  
Thermal correction to Gibbs Free Energy= 0.773984  
Sum of electronic and zero-point Energies= -2811.893415  
Sum of electronic and thermal Energies= -2811.840872  
Sum of electronic and thermal Enthalpies= -2811.839928  
Sum of electronic and thermal Free Energies= -2811.979120

Cartesian Coordinates

|   |           |           |           |
|---|-----------|-----------|-----------|
| C | 2.035306  | -0.919153 | -2.096736 |
| C | 0.993764  | -1.398520 | -1.287597 |
| C | -0.316669 | -1.424875 | -1.789287 |
| C | -0.583199 | -0.975514 | -3.083216 |
| C | 0.451636  | -0.487764 | -3.887413 |
| C | 1.755002  | -0.462606 | -3.389772 |
| H | -1.116747 | -1.812280 | -1.169654 |
| H | 0.241191  | -0.135784 | -4.893478 |
| C | 1.235222  | -1.792068 | 0.112295  |
| C | 3.524040  | -0.817446 | -1.792865 |
| C | 4.017898  | 0.163113  | -2.904754 |
| H | 5.053109  | -0.044838 | -3.185445 |
| H | 3.971336  | 1.187161  | -2.532469 |
| C | 3.023445  | -0.008754 | -4.075407 |
| O | 2.109145  | -2.767049 | 0.356781  |
| C | 1.248275  | -1.834097 | 2.369193  |
| N | 0.690440  | -1.224193 | 1.136461  |
| C | 3.878120  | -0.388781 | -0.374955 |
| C | 3.291896  | 0.607361  | 0.417830  |
| C | 3.691362  | 0.749208  | 1.756119  |
| C | 4.697917  | -0.063564 | 2.278721  |
| C | 5.318111  | -1.025617 | 1.474997  |
| C | 4.892069  | -1.193374 | 0.158210  |
| H | 3.223157  | 1.510264  | 2.372488  |
| H | 6.109758  | -1.649235 | 1.880598  |
| C | 2.368695  | 1.623054  | -0.135562 |
| C | 4.230368  | -2.212865 | -1.906192 |
| H | 4.578259  | -2.395868 | -2.925575 |
| H | 3.520054  | -2.999035 | -1.646769 |
| C | 5.371998  | -2.193163 | -0.867293 |



|    |           |           |           |
|----|-----------|-----------|-----------|
| O  | 2.974728  | 2.525321  | -0.933479 |
| C  | 0.728732  | 3.101817  | -0.525082 |
| H  | -0.162434 | 2.935093  | -1.130517 |
| N  | 1.118743  | 1.809320  | 0.103830  |
| C  | 1.939952  | 3.426597  | -1.418305 |
| H  | 1.768235  | 3.197025  | -2.473225 |
| H  | 2.318752  | 4.443895  | -1.321226 |
| C  | 2.256240  | -2.866315 | 1.809571  |
| H  | 3.293002  | -2.631760 | 2.045415  |
| H  | 2.035652  | -3.898120 | 2.082106  |
| H  | 5.002648  | 0.059842  | 3.313188  |
| H  | 3.361224  | -0.782461 | -4.776634 |
| H  | 2.889364  | 0.910228  | -4.654062 |
| H  | 6.314133  | -1.849495 | -1.312794 |
| H  | 5.563636  | -3.180483 | -0.436743 |
| H  | -1.600763 | -1.005727 | -3.458130 |
| H  | 1.775211  | -1.043907 | 2.911337  |
| Fe | -0.476320 | 0.500774  | 0.910420  |
| Cl | -1.010981 | 1.560863  | 2.999997  |
| C  | 0.404858  | 4.156562  | 0.553514  |
| H  | -0.431491 | 3.747837  | 1.132683  |
| C  | -0.043161 | 5.466125  | -0.107755 |
| H  | -0.459620 | 6.152811  | 0.636148  |
| H  | 0.795927  | 5.982714  | -0.586731 |
| H  | -0.796720 | 5.299840  | -0.887780 |
| C  | 1.562297  | 4.395032  | 1.526243  |
| H  | 1.843148  | 3.474531  | 2.044592  |
| H  | 2.448668  | 4.787713  | 1.015412  |
| H  | 1.270966  | 5.126972  | 2.285762  |
| C  | 0.162308  | -2.418421 | 3.286316  |
| H  | -0.482457 | -1.572414 | 3.551406  |
| C  | 0.796165  | -2.945991 | 4.578208  |
| H  | 0.022267  | -3.284148 | 5.274030  |
| H  | 1.456680  | -3.799357 | 4.384166  |
| H  | 1.383482  | -2.169491 | 5.080134  |
| C  | -0.682674 | -3.486399 | 2.586401  |
| H  | -1.100166 | -3.107723 | 1.649807  |
| H  | -0.096440 | -4.383299 | 2.357626  |
| H  | -1.514060 | -3.799663 | 3.225343  |
| C  | -3.296802 | -0.415878 | -0.118042 |
| C  | -3.934110 | -1.596022 | -0.770010 |
| C  | -4.968761 | -1.442026 | -1.710618 |
| C  | -3.532459 | -2.899175 | -0.431091 |
| C  | -5.553970 | -2.553525 | -2.313112 |
| H  | -5.309157 | -0.448337 | -1.977663 |
| C  | -4.128055 | -4.009462 | -1.030456 |
| H  | -2.750274 | -3.042197 | 0.304466  |
| C  | -5.138294 | -3.844509 | -1.977820 |
| H  | -6.346718 | -2.409589 | -3.041711 |
| H  | -3.797415 | -5.006560 | -0.753753 |
| H  | -5.601798 | -4.708507 | -2.443998 |

|   |           |           |           |
|---|-----------|-----------|-----------|
| C | -2.725110 | 0.641928  | -0.881460 |
| O | -1.786732 | 1.384568  | -0.439286 |
| O | -3.270880 | 0.898604  | -2.068071 |
| C | -2.713011 | 1.973975  | -2.852979 |
| H | -2.910746 | 2.936692  | -2.377445 |
| H | -1.641057 | 1.826638  | -2.995404 |
| H | -3.229982 | 1.918768  | -3.810245 |
| C | -3.133973 | -1.000513 | 2.212839  |
| H | -2.410585 | -1.426221 | 2.901473  |
| H | -3.535625 | -0.085611 | 2.650491  |
| O | -2.436522 | -0.728745 | 0.982247  |
| H | -2.374255 | 3.124146  | -0.201859 |
| H | -4.459384 | 0.411119  | 0.476709  |
| O | -3.018767 | 3.832673  | -0.002664 |
| H | -2.509787 | 4.652788  | 0.063676  |
| H | -4.676785 | 1.755235  | 1.614115  |
| O | -5.235512 | 0.990884  | 1.069979  |
| H | -5.867765 | 1.410752  | 0.461806  |
| O | -3.878203 | 2.684237  | 2.218478  |
| H | -3.056501 | 2.286414  | 2.584110  |
| H | -3.563436 | 3.264389  | 1.473517  |
| H | -3.941626 | -1.715655 | 2.039880  |

---

**(S)-TS(D<sub>r</sub>-P)<sub>3w</sub>**

---

Number of imaginary frequencies: 1    Electronic energy:    HF=-2812.7534417  
Zero-point correction=                    0.860468 (Hartree/Particle)  
Thermal correction to Energy=            0.912705  
Thermal correction to Enthalpy=         0.913649  
Thermal correction to Gibbs Free Energy= 0.773197  
Sum of electronic and zero-point Energies= -2811.892974  
Sum of electronic and thermal Energies= -2811.840737  
Sum of electronic and thermal Enthalpies= -2811.839793  
Sum of electronic and thermal Free Energies= -2811.980245

.....  
Cartesian Coordinates

|   |          |           |           |
|---|----------|-----------|-----------|
| C | 2.951271 | -1.258074 | 1.680439  |
| C | 1.996166 | -0.234856 | 1.790826  |
| C | 0.867082 | -0.432293 | 2.602404  |
| C | 0.721030 | -1.612701 | 3.329510  |
| C | 1.688546 | -2.620673 | 3.242758  |
| C | 2.788734 | -2.443972 | 2.404795  |
| H | 0.112842 | 0.344328  | 2.648914  |
| H | 1.566644 | -3.543417 | 3.803012  |
| C | 2.125323 | 1.031764  | 1.044918  |
| C | 4.148985 | -1.344763 | 0.744457  |
| C | 4.485068 | -2.874955 | 0.759271  |
| H | 5.561469 | -3.038853 | 0.673399  |
| H | 4.000286 | -3.368472 | -0.081352 |
| C | 3.900593 | -3.415859 | 2.085839  |

|    |           |           |           |
|----|-----------|-----------|-----------|
| O  | 3.273036  | 1.707201  | 1.202576  |
| C  | 1.788855  | 2.848543  | -0.237320 |
| N  | 1.250259  | 1.554132  | 0.255021  |
| C  | 3.862475  | -0.769394 | -0.639095 |
| C  | 2.675617  | -0.823659 | -1.393024 |
| C  | 2.572590  | -0.065254 | -2.571037 |
| C  | 3.652292  | 0.696703  | -3.013422 |
| C  | 4.843750  | 0.726534  | -2.280716 |
| C  | 4.934964  | 0.007678  | -1.088883 |
| H  | 1.646847  | -0.083403 | -3.134637 |
| H  | 5.681240  | 1.327090  | -2.624520 |
| C  | 1.529914  | -1.655618 | -0.996300 |
| C  | 5.388376  | -0.506145 | 1.206750  |
| H  | 6.047518  | -1.098160 | 1.845776  |
| H  | 5.053002  | 0.360542  | 1.774741  |
| C  | 6.073159  | -0.034318 | -0.096068 |
| O  | 1.810908  | -2.914996 | -0.646527 |
| C  | -0.509087 | -2.569984 | -0.718406 |
| H  | -1.264761 | -2.354296 | 0.039153  |
| N  | 0.273347  | -1.326949 | -0.992152 |
| C  | 0.570662  | -3.513815 | -0.167653 |
| H  | 0.615670  | -3.531196 | 0.923021  |
| H  | 0.531898  | -4.529252 | -0.557130 |
| C  | 3.244037  | 2.829209  | 0.268894  |
| H  | 3.968730  | 2.616508  | -0.518229 |
| H  | 3.546054  | 3.719874  | 0.819534  |
| H  | 3.561375  | 1.271677  | -3.929259 |
| H  | 4.650558  | -3.403728 | 2.887137  |
| H  | 3.544604  | -4.446712 | 1.998653  |
| H  | 6.835202  | -0.750695 | -0.428625 |
| H  | 6.571006  | 0.933335  | 0.016419  |
| H  | -0.151432 | -1.751240 | 3.960464  |
| H  | 1.752640  | 2.832547  | -1.327174 |
| Fe | -0.478760 | 0.613986  | -0.599544 |
| Cl | -0.633834 | 2.107350  | -2.512726 |
| C  | -1.213361 | -3.094989 | -1.987959 |
| H  | -1.947163 | -2.333043 | -2.260559 |
| C  | -1.967722 | -4.395913 | -1.675602 |
| H  | -2.654973 | -4.642028 | -2.490809 |
| H  | -1.281983 | -5.242873 | -1.564018 |
| H  | -2.552832 | -4.320106 | -0.753461 |
| C  | -0.264308 | -3.279761 | -3.175945 |
| H  | 0.208566  | -2.337346 | -3.466429 |
| H  | 0.526880  | -4.006189 | -2.958295 |
| H  | -0.817768 | -3.652141 | -4.043545 |
| C  | 0.945918  | 4.036931  | 0.258022  |
| H  | -0.067573 | 3.854341  | -0.113655 |
| C  | 1.449425  | 5.336194  | -0.378677 |
| H  | 0.809352  | 6.178842  | -0.098086 |
| H  | 2.468519  | 5.577624  | -0.055066 |
| H  | 1.449978  | 5.264989  | -1.471449 |

|   |           |           |           |
|---|-----------|-----------|-----------|
| C | 0.899531  | 4.131658  | 1.786688  |
| H | 0.439292  | 3.245626  | 2.234544  |
| H | 1.899896  | 4.242935  | 2.219316  |
| H | 0.329817  | 5.012313  | 2.103749  |
| C | -3.513811 | 0.150273  | 0.064752  |
| C | -4.571196 | -0.873719 | 0.312191  |
| C | -4.476050 | -2.149355 | -0.264244 |
| C | -5.707879 | -0.572117 | 1.081345  |
| C | -5.473602 | -3.103078 | -0.062533 |
| H | -3.615203 | -2.389273 | -0.872395 |
| C | -6.697835 | -1.530302 | 1.291496  |
| H | -5.813073 | 0.414131  | 1.520540  |
| C | -6.588620 | -2.800574 | 0.719776  |
| H | -5.375719 | -4.083549 | -0.520001 |
| H | -7.565961 | -1.278645 | 1.893869  |
| H | -7.367177 | -3.540872 | 0.876369  |
| C | -2.794964 | 0.746402  | 1.138304  |
| O | -1.631484 | 1.260719  | 0.998296  |
| O | -3.423503 | 0.820987  | 2.308644  |
| C | -2.779777 | 1.505563  | 3.403249  |
| H | -2.724560 | 2.576727  | 3.200025  |
| H | -1.782743 | 1.100460  | 3.584998  |
| H | -3.420267 | 1.321224  | 4.264832  |
| C | -3.171347 | -0.010031 | -2.323444 |
| H | -2.414006 | -0.356069 | -3.024649 |
| H | -3.406096 | 1.030781  | -2.546809 |
| O | -2.608382 | -0.151343 | -1.003473 |
| H | -1.810633 | 3.108336  | 1.220095  |
| H | -4.310797 | 1.388596  | -0.392599 |
| O | -2.332094 | 3.933059  | 1.158622  |
| H | -1.770464 | 4.637339  | 1.510980  |
| H | -4.077457 | 2.979930  | -1.151226 |
| O | -4.856538 | 2.253805  | -0.888423 |
| H | -5.478151 | 2.650390  | -0.254433 |
| O | -3.024568 | 3.798813  | -1.389800 |
| H | -2.296671 | 3.294754  | -1.823471 |
| H | -2.690978 | 4.006207  | -0.476599 |
| H | -4.071580 | -0.622398 | -2.414116 |

-----  
1CSSA  
-----

Number of imaginary frequencies: 0    Electronic energy:    HF=-2467.5092782  
Zero-point correction=                    0.735285 (Hartree/Particle)  
Thermal correction to Energy=            0.777647  
Thermal correction to Enthalpy=         0.778591  
Thermal correction to Gibbs Free Energy= 0.661413  
Sum of electronic and zero-point Energies= -2466.773993  
Sum of electronic and thermal Energies= -2466.731632  
Sum of electronic and thermal Enthalpies= -2466.730688  
Sum of electronic and thermal Free Energies= -2466.847865  
.....

## Cartesian Coordinates

|    |           |           |           |
|----|-----------|-----------|-----------|
| C  | -2.815935 | -0.925920 | -1.184163 |
| C  | -1.625483 | -0.307502 | -1.597170 |
| C  | -0.868583 | -0.900945 | -2.619100 |
| C  | -1.308116 | -2.075345 | -3.231586 |
| C  | -2.500816 | -2.684066 | -2.826391 |
| C  | -3.236930 | -2.115681 | -1.787821 |
| H  | 0.051315  | -0.432490 | -2.948044 |
| H  | -2.838523 | -3.598009 | -3.306174 |
| C  | -1.252598 | 1.034785  | -1.089822 |
| C  | -3.754592 | -0.530789 | -0.049789 |
| C  | -4.521027 | -1.866908 | 0.218208  |
| H  | -5.529252 | -1.680033 | 0.594728  |
| H  | -3.984043 | -2.453193 | 0.964792  |
| C  | -4.505314 | -2.616296 | -1.134297 |
| O  | -2.121889 | 1.979013  | -1.487929 |
| C  | -0.328811 | 2.949325  | -0.344477 |
| N  | -0.243977 | 1.444257  | -0.383562 |
| C  | -3.043410 | 0.039817  | 1.167095  |
| C  | -1.834919 | -0.371392 | 1.749125  |
| C  | -1.260475 | 0.395969  | 2.777427  |
| C  | -1.906084 | 1.546492  | 3.235367  |
| C  | -3.125060 | 1.939853  | 2.678489  |
| C  | -3.685450 | 1.186554  | 1.644568  |
| H  | -0.323861 | 0.083731  | 3.230257  |
| H  | -3.622602 | 2.836618  | 3.035875  |
| C  | -1.042637 | -1.452729 | 1.149082  |
| C  | -4.747636 | 0.621421  | -0.431692 |
| H  | -5.681256 | 0.221129  | -0.832955 |
| H  | -4.297961 | 1.251644  | -1.198156 |
| C  | -4.953263 | 1.442209  | 0.863517  |
| O  | -1.582755 | -2.653219 | 0.947678  |
| C  | 0.621660  | -2.520480 | 0.054271  |
| H  | 0.836320  | -2.270207 | -0.988736 |
| N  | 0.158418  | -1.272399 | 0.709864  |
| C  | -0.636379 | -3.421005 | 0.143660  |
| H  | -1.105798 | -3.600186 | -0.822616 |
| H  | -0.467218 | -4.364541 | 0.660880  |
| C  | -1.763963 | 3.209981  | -0.800036 |
| H  | -2.459266 | 3.327159  | 0.035667  |
| H  | -1.881250 | 4.032238  | -1.504227 |
| H  | -1.444177 | 2.137728  | 4.017908  |
| H  | -5.374453 | -2.349877 | -1.749097 |
| H  | -4.521761 | -3.703287 | -1.014676 |
| H  | -5.817813 | 1.080586  | 1.434532  |
| H  | -5.127227 | 2.504178  | 0.666830  |
| H  | -0.719082 | -2.514075 | -4.030478 |
| H  | -0.184590 | 3.261245  | 0.684609  |
| Fe | 0.981657  | 0.508847  | 0.950392  |
| Cl | 1.603908  | 2.445474  | 1.987521  |

|   |           |           |           |
|---|-----------|-----------|-----------|
| C | 2.550163  | 0.140043  | 0.209705  |
| C | 3.173979  | 0.099350  | -1.071669 |
| C | 2.462408  | 0.589256  | -2.193109 |
| C | 4.471912  | -0.439464 | -1.273643 |
| C | 3.019463  | 0.555628  | -3.460577 |
| H | 1.480769  | 1.002098  | -2.021846 |
| C | 5.018393  | -0.482300 | -2.548886 |
| H | 5.034502  | -0.813940 | -0.428553 |
| C | 4.299145  | 0.015329  | -3.641466 |
| H | 2.468619  | 0.950233  | -4.308081 |
| H | 6.009730  | -0.897166 | -2.697213 |
| H | 4.737875  | -0.014738 | -4.633879 |
| C | 3.152635  | -0.240691 | 1.516400  |
| O | 2.289365  | -0.383558 | 2.400700  |
| O | 4.446827  | -0.318690 | 1.724362  |
| C | 4.865443  | -0.512690 | 3.106929  |
| H | 4.513541  | -1.481979 | 3.463092  |
| H | 5.951725  | -0.473539 | 3.080972  |
| H | 4.452058  | 0.287052  | 3.722174  |
| C | 1.881410  | -3.149556 | 0.675768  |
| H | 2.681343  | -2.408396 | 0.577966  |
| C | 2.309687  | -4.366219 | -0.156937 |
| H | 3.248251  | -4.777494 | 0.224069  |
| H | 1.565392  | -5.169010 | -0.115660 |
| H | 2.460584  | -4.099211 | -1.208244 |
| C | 1.716209  | -3.494377 | 2.157832  |
| H | 1.425205  | -2.619067 | 2.741570  |
| H | 0.967474  | -4.278779 | 2.310838  |
| H | 2.659173  | -3.872965 | 2.563408  |
| C | 0.770862  | 3.592110  | -1.210587 |
| H | 1.699706  | 3.084390  | -0.930628 |
| C | 0.920312  | 5.070895  | -0.833637 |
| H | 1.709405  | 5.542392  | -1.426251 |
| H | -0.005556 | 5.627934  | -1.021782 |
| H | 1.178029  | 5.176713  | 0.223629  |
| C | 0.541983  | 3.426896  | -2.719752 |
| H | 0.284779  | 2.401599  | -3.003997 |
| H | -0.266505 | 4.072676  | -3.077589 |
| H | 1.444334  | 3.707060  | -3.270564 |

---

<sup>10</sup>SSA

---

Number of imaginary frequencies: 0    Electronic energy:    HF=-2467.507816  
Zero-point correction=                    0.732672 (Hartree/Particle)  
Thermal correction to Energy=            0.776392  
Thermal correction to Enthalpy=        0.777336  
Thermal correction to Gibbs Free Energy= 0.655265  
Sum of electronic and zero-point Energies= -2466.775144  
Sum of electronic and thermal Energies= -2466.731424  
Sum of electronic and thermal Enthalpies= -2466.730480  
Sum of electronic and thermal Free Energies= -2466.852551

.....  
 Cartesian Coordinates  
 .....

|    |           |           |           |
|----|-----------|-----------|-----------|
| C  | -2.992324 | -0.925888 | -0.925457 |
| C  | -1.839145 | -0.440272 | -1.557455 |
| C  | -1.220685 | -1.230886 | -2.539290 |
| C  | -1.749687 | -2.473512 | -2.887344 |
| C  | -2.906130 | -2.950679 | -2.261957 |
| C  | -3.513225 | -2.177514 | -1.274559 |
| H  | -0.345096 | -0.857893 | -3.055571 |
| H  | -3.319715 | -3.915823 | -2.539156 |
| C  | -1.343914 | 0.941434  | -1.333727 |
| C  | -3.802953 | -0.292297 | 0.195038  |
| C  | -4.620847 | -1.508503 | 0.741996  |
| H  | -5.588866 | -1.192790 | 1.137439  |
| H  | -4.065854 | -1.985104 | 1.551408  |
| C  | -4.738539 | -2.489174 | -0.446511 |
| O  | -2.127709 | 1.882252  | -1.884384 |
| C  | -0.166496 | 2.835132  | -1.008218 |
| N  | -0.261520 | 1.360169  | -0.759668 |
| C  | -2.966586 | 0.397617  | 1.257870  |
| C  | -1.758263 | -0.023611 | 1.834346  |
| C  | -1.092418 | 0.821549  | 2.740589  |
| C  | -1.637444 | 2.064551  | 3.072453  |
| C  | -2.847015 | 2.475107  | 2.511317  |
| C  | -3.506134 | 1.638419  | 1.607305  |
| H  | -0.169664 | 0.494232  | 3.210561  |
| H  | -3.266290 | 3.443046  | 2.769368  |
| C  | -1.056394 | -1.226136 | 1.364196  |
| C  | -4.740509 | 0.862572  | -0.297349 |
| H  | -5.722354 | 0.480483  | -0.585303 |
| H  | -4.299797 | 1.340587  | -1.172707 |
| C  | -4.803649 | 1.874739  | 0.870167  |
| O  | -1.653747 | -2.411946 | 1.347725  |
| C  | 0.556756  | -2.531480 | 0.464759  |
| H  | 0.831283  | -2.476980 | -0.592819 |
| N  | 0.148147  | -1.173355 | 0.892106  |
| C  | -0.758207 | -3.330948 | 0.639686  |
| H  | -1.243249 | -3.579269 | -0.303767 |
| H  | -0.656855 | -4.220071 | 1.260165  |
| C  | -1.578384 | 3.177187  | -1.500821 |
| H  | -2.217711 | 3.577745  | -0.709535 |
| H  | -1.616675 | 3.825426  | -2.375362 |
| H  | -1.102844 | 2.710364  | 3.759331  |
| H  | -5.644619 | -2.298637 | -1.035537 |
| H  | -4.781294 | -3.534277 | -0.127098 |
| H  | -5.649419 | 1.666251  | 1.537594  |
| H  | -4.919312 | 2.907297  | 0.527927  |
| H  | -1.263735 | -3.065381 | -3.656153 |
| H  | 0.043152  | 3.322264  | -0.058785 |
| Fe | 0.950506  | 0.627186  | 0.771137  |

|    |           |           |           |
|----|-----------|-----------|-----------|
| Cl | 1.665935  | 2.583721  | 1.649120  |
| C  | 2.589878  | 0.101848  | 0.242409  |
| C  | 3.076396  | -0.436108 | -0.988220 |
| C  | 2.248235  | -0.402911 | -2.135796 |
| C  | 4.357261  | -1.040428 | -1.090670 |
| C  | 2.677072  | -0.944077 | -3.336325 |
| H  | 1.284817  | 0.075135  | -2.042055 |
| C  | 4.773098  | -1.599479 | -2.290044 |
| H  | 5.011081  | -1.061238 | -0.227200 |
| C  | 3.937854  | -1.549751 | -3.412684 |
| H  | 2.043638  | -0.896847 | -4.216304 |
| H  | 5.749237  | -2.067008 | -2.361049 |
| H  | 4.273773  | -1.979218 | -4.351379 |
| C  | 3.473933  | 0.172412  | 1.449824  |
| O  | 3.132433  | -0.354794 | 2.495923  |
| O  | 4.576552  | 0.891304  | 1.266431  |
| C  | 5.314299  | 1.228880  | 2.469199  |
| H  | 5.664696  | 0.321489  | 2.963392  |
| H  | 6.149132  | 1.838132  | 2.129722  |
| H  | 4.664830  | 1.793558  | 3.140025  |
| C  | 1.751145  | -3.078487 | 1.266302  |
| H  | 2.569378  | -2.368876 | 1.122627  |
| C  | 2.192023  | -4.426383 | 0.682714  |
| H  | 3.083675  | -4.791324 | 1.199328  |
| H  | 1.417586  | -5.193800 | 0.794851  |
| H  | 2.431027  | -4.342087 | -0.383222 |
| C  | 1.473203  | -3.152872 | 2.769481  |
| H  | 1.209732  | -2.171789 | 3.170082  |
| H  | 0.670513  | -3.860029 | 3.006557  |
| H  | 2.368703  | -3.488929 | 3.298277  |
| C  | 0.987007  | 3.144993  | -1.980645 |
| H  | 1.861791  | 2.628480  | -1.567715 |
| C  | 1.282392  | 4.649402  | -1.970904 |
| H  | 2.124524  | 4.881299  | -2.628808 |
| H  | 0.422371  | 5.229593  | -2.326132 |
| H  | 1.534114  | 4.991984  | -0.963050 |
| C  | 0.740446  | 2.631601  | -3.404475 |
| H  | 0.455577  | 1.575489  | -3.425644 |
| H  | -0.051037 | 3.196559  | -3.907994 |
| H  | 1.646776  | 2.739342  | -4.006732 |

-----  
<sup>3</sup>A  
 -----

Number of imaginary frequencies: 0    Electronic energy:    HF=-2467.5256443  
 Zero-point correction=                    0.731985 (Hartree/Particle)  
 Thermal correction to Energy=            0.775740  
 Thermal correction to Enthalpy=         0.776684  
 Thermal correction to Gibbs Free Energy= 0.652125  
 Sum of electronic and zero-point Energies= -2466.793659  
 Sum of electronic and thermal Energies= -2466.749904  
 Sum of electronic and thermal Enthalpies= -2466.748960



Sum of electronic and thermal Free Energies= -2466.873519

.....  
Cartesian Coordinates  
.....

|   |           |           |           |
|---|-----------|-----------|-----------|
| C | -2.836974 | -1.161496 | -1.027198 |
| C | -1.812976 | -0.369891 | -1.565705 |
| C | -1.051298 | -0.870789 | -2.633002 |
| C | -1.343063 | -2.121191 | -3.178998 |
| C | -2.387582 | -2.895823 | -2.661263 |
| C | -3.114007 | -2.420158 | -1.570409 |
| H | -0.248399 | -0.271278 | -3.045909 |
| H | -2.613852 | -3.866131 | -3.093624 |
| C | -1.600456 | 1.025780  | -1.118686 |
| C | -3.700385 | -0.888564 | 0.196617  |
| C | -4.248034 | -2.313833 | 0.540072  |
| H | -5.243187 | -2.260012 | 0.986978  |
| H | -3.584268 | -2.799738 | 1.255792  |
| C | -4.224678 | -3.093097 | -0.796285 |
| O | -2.609759 | 1.854366  | -1.434394 |
| C | -0.813404 | 3.031849  | -0.482319 |
| N | -0.580672 | 1.554329  | -0.527861 |
| C | -2.941774 | -0.221924 | 1.335717  |
| C | -1.640421 | -0.476850 | 1.800311  |
| C | -1.076629 | 0.354775  | 2.786128  |
| C | -1.812570 | 1.419305  | 3.308785  |
| C | -3.112920 | 1.662579  | 2.861213  |
| C | -3.670018 | 0.841327  | 1.878619  |
| H | -0.078023 | 0.149967  | 3.161792  |
| H | -3.682588 | 2.492339  | 3.269222  |
| C | -0.771840 | -1.470054 | 1.157647  |
| C | -4.867449 | 0.122692  | -0.073443 |
| H | -5.780428 | -0.399262 | -0.367859 |
| H | -4.589656 | 0.792546  | -0.886515 |
| C | -5.032822 | 0.932761  | 1.233490  |
| O | -1.197920 | -2.710501 | 0.965947  |
| C | 0.990403  | -2.409754 | 0.083960  |
| H | 1.248381  | -2.163027 | -0.949706 |
| N | 0.411814  | -1.189431 | 0.702786  |
| C | -0.208491 | -3.386633 | 0.126035  |
| H | -0.674291 | -3.544690 | -0.845531 |
| H | 0.013801  | -4.340621 | 0.600950  |
| C | -2.304162 | 3.144917  | -0.832037 |
| H | -2.940684 | 3.249708  | 0.050657  |
| H | -2.547242 | 3.916967  | -1.561074 |
| H | -1.362560 | 2.057451  | 4.060962  |
| H | -5.173976 | -2.988417 | -1.336656 |
| H | -4.056406 | -4.164503 | -0.655139 |
| H | -5.783464 | 0.481067  | 1.894303  |
| H | -5.351246 | 1.963714  | 1.053293  |
| H | -0.757518 | -2.489387 | -4.015159 |
| H | -0.624936 | 3.374789  | 0.532951  |

|    |           |           |           |
|----|-----------|-----------|-----------|
| Fe | 0.976372  | 0.722922  | 0.759679  |
| Cl | 1.495114  | 2.661054  | 1.722942  |
| C  | 2.707356  | 0.349384  | 0.263118  |
| C  | 3.147927  | 0.134088  | -1.075521 |
| C  | 2.348004  | 0.582953  | -2.158455 |
| C  | 4.341712  | -0.578797 | -1.368832 |
| C  | 2.722955  | 0.333791  | -3.469332 |
| H  | 1.445860  | 1.138949  | -1.939717 |
| C  | 4.698856  | -0.835086 | -2.685040 |
| H  | 4.971948  | -0.917040 | -0.556483 |
| C  | 3.896162  | -0.381904 | -3.738583 |
| H  | 2.111408  | 0.703355  | -4.286513 |
| H  | 5.610785  | -1.383769 | -2.896430 |
| H  | 4.188944  | -0.578010 | -4.765002 |
| C  | 3.473867  | 0.162711  | 1.516258  |
| O  | 2.902315  | -0.153152 | 2.552067  |
| O  | 4.781842  | 0.409863  | 1.421320  |
| C  | 5.521636  | 0.346667  | 2.664873  |
| H  | 5.472963  | -0.661952 | 3.079755  |
| H  | 6.543674  | 0.613180  | 2.403580  |
| H  | 5.101557  | 1.056135  | 3.379592  |
| C  | 2.245982  | -2.935597 | 0.803824  |
| H  | 2.989835  | -2.138292 | 0.752475  |
| C  | 2.816954  | -4.131157 | 0.029992  |
| H  | 3.749955  | -4.468426 | 0.489215  |
| H  | 2.131672  | -4.986098 | 0.028874  |
| H  | 3.030577  | -3.866399 | -1.011209 |
| C  | 1.998579  | -3.251898 | 2.280498  |
| H  | 1.657046  | -2.366689 | 2.820660  |
| H  | 1.264091  | -4.054129 | 2.412066  |
| H  | 2.926682  | -3.586058 | 2.751944  |
| C  | 0.154366  | 3.762365  | -1.433525 |
| H  | 1.157412  | 3.429220  | -1.142226 |
| C  | 0.078597  | 5.274694  | -1.193598 |
| H  | 0.799224  | 5.800858  | -1.825557 |
| H  | -0.914832 | 5.672241  | -1.432755 |
| H  | 0.302606  | 5.518727  | -0.150863 |
| C  | -0.068334 | 3.414521  | -2.910251 |
| H  | -0.048501 | 2.335004  | -3.090411 |
| H  | -1.027794 | 3.792757  | -3.278754 |
| H  | 0.714586  | 3.866169  | -3.525706 |

---

**ICSS(A-B)**

---

Number of imaginary frequencies: 1    Electronic energy:    HF=-2583.2582425  
Zero-point correction=                    0.787897 (Hartree/Particle)  
Thermal correction to Energy=            0.833586  
Thermal correction to Enthalpy=         0.834530  
Thermal correction to Gibbs Free Energy= 0.712525  
Sum of electronic and zero-point Energies= -2582.470345  
Sum of electronic and thermal Energies= -2582.424656

Sum of electronic and thermal Enthalpies= -2582.423712  
Sum of electronic and thermal Free Energies= -2582.545717

.....  
Cartesian Coordinates

.....  
C -3.013231 -0.982752 -1.007064  
C -1.811272 -0.503150 -1.547294  
C -1.126113 -1.295586 -2.480677  
C -1.644150 -2.528097 -2.879166  
C -2.847659 -2.999766 -2.344005  
C -3.514271 -2.230931 -1.391517  
H -0.198532 -0.938762 -2.906611  
H -3.245952 -3.961013 -2.655189  
C -1.351555 0.884600 -1.290863  
C -3.888110 -0.354495 0.068096  
C -4.704986 -1.583862 0.582469  
H -5.687009 -1.284764 0.956114  
H -4.163621 -2.065588 1.397984  
C -4.778680 -2.547552 -0.624823  
O -2.172248 1.793152 -1.853825  
C -0.280047 2.833708 -0.976564  
N -0.305995 1.357157 -0.685726  
C -3.101226 0.371520 1.145498  
C -1.893128 -0.005592 1.749135  
C -1.249182 0.892763 2.619846  
C -1.812671 2.141709 2.891344  
C -3.027405 2.505831 2.307404  
C -3.664968 1.618094 1.438674  
H -0.328655 0.599095 3.113207  
H -3.462726 3.478469 2.516386  
C -1.162560 -1.208339 1.320999  
C -4.833869 0.771024 -0.476640  
H -5.801057 0.363657 -0.778944  
H -4.378936 1.236545 -1.350682  
C -4.948129 1.808492 0.664758  
O -1.753486 -2.404296 1.329982  
C 0.465140 -2.521783 0.486356  
H 0.798033 -2.496887 -0.554170  
N 0.040869 -1.149718 0.856961  
C -0.855144 -3.316792 0.622727  
H -1.320916 -3.546024 -0.334815  
H -0.771000 -4.219151 1.226349  
C -1.717640 3.102614 -1.414230  
H -2.362370 3.411402 -0.586078  
H -1.823667 3.792264 -2.250353  
H -1.291919 2.828468 3.548847  
H -5.658403 -2.341472 -1.247732  
H -4.841486 -3.596811 -0.322877  
H -5.805408 1.596004 1.316192  
H -5.077032 2.830448 0.296595  
H -1.105391 -3.121252 -3.611021

|    |           |           |           |
|----|-----------|-----------|-----------|
| H  | -0.045604 | 3.356277  | -0.054246 |
| Fe | 0.859699  | 0.668255  | 0.825306  |
| Cl | 1.577723  | 2.807639  | 1.608078  |
| C  | 2.538774  | 0.154801  | 0.123831  |
| C  | 2.921820  | -0.669410 | -1.018226 |
| C  | 2.272193  | -0.455305 | -2.247757 |
| C  | 3.911589  | -1.668798 | -0.935051 |
| C  | 2.585544  | -1.227313 | -3.358821 |
| H  | 1.534721  | 0.333169  | -2.301198 |
| C  | 4.203729  | -2.460476 | -2.044421 |
| H  | 4.448458  | -1.821661 | -0.006367 |
| C  | 3.543075  | -2.242771 | -3.255028 |
| H  | 2.088151  | -1.043695 | -4.306257 |
| H  | 4.958149  | -3.236579 | -1.967876 |
| H  | 3.781237  | -2.854095 | -4.119683 |
| C  | 3.239164  | -0.033206 | 1.456195  |
| O  | 4.400514  | -0.102569 | 1.762372  |
| O  | 2.200445  | -0.022340 | 2.360476  |
| C  | 2.495068  | 0.236702  | 3.756116  |
| H  | 2.516392  | 1.318050  | 3.898264  |
| H  | 1.690555  | -0.222185 | 4.328185  |
| H  | 3.454210  | -0.214649 | 4.004523  |
| C  | 1.608726  | -3.061385 | 1.367289  |
| H  | 2.436861  | -2.357398 | 1.268228  |
| C  | 2.096486  | -4.408157 | 0.820452  |
| H  | 2.943967  | -4.774601 | 1.406352  |
| H  | 1.314595  | -5.174282 | 0.867872  |
| H  | 2.420163  | -4.316542 | -0.221217 |
| C  | 1.234861  | -3.139728 | 2.850157  |
| H  | 0.849637  | -2.184161 | 3.214233  |
| H  | 0.476570  | -3.905578 | 3.042752  |
| H  | 2.112838  | -3.399074 | 3.448338  |
| C  | 0.798580  | 3.166400  | -2.026226 |
| H  | 1.712943  | 2.676376  | -1.680664 |
| C  | 1.050562  | 4.679325  | -2.040908 |
| H  | 1.841988  | 4.932403  | -2.752257 |
| H  | 0.154258  | 5.234139  | -2.342587 |
| H  | 1.352923  | 5.036600  | -1.051804 |
| C  | 0.476726  | 2.643571  | -3.432593 |
| H  | 0.227301  | 1.578184  | -3.439137 |
| H  | -0.364962 | 3.178218  | -3.884698 |
| H  | 1.339070  | 2.783200  | -4.090734 |
| O  | 3.428576  | 1.783234  | -0.384703 |
| C  | 4.864403  | 1.881514  | -0.423436 |
| H  | 5.123965  | 2.819043  | -0.922076 |
| H  | 5.293022  | 1.839667  | 0.578526  |
| H  | 5.222552  | 1.038850  | -1.015686 |
| H  | 3.011434  | 2.397159  | 0.281460  |

---

<sup>10</sup>SS(A-B)

---

Number of imaginary frequencies: 1    Electronic energy:    HF=-2583.2599403  
 Zero-point correction=                    0.787138 (Hartree/Particle)  
 Thermal correction to Energy=            0.833447  
 Thermal correction to Enthalpy=         0.834391  
 Thermal correction to Gibbs Free Energy= 0.710134  
 Sum of electronic and zero-point Energies= -2582.472802  
 Sum of electronic and thermal Energies= -2582.426493  
 Sum of electronic and thermal Enthalpies= -2582.425549  
 Sum of electronic and thermal Free Energies= -2582.549806

.....  
 Cartesian Coordinates

.....

|   |           |           |           |
|---|-----------|-----------|-----------|
| C | -3.047987 | -0.913461 | -1.031186 |
| C | -1.853668 | -0.418675 | -1.574522 |
| C | -1.178628 | -1.187091 | -2.535351 |
| C | -1.700328 | -2.409355 | -2.959338 |
| C | -2.898842 | -2.893753 | -2.424370 |
| C | -3.555064 | -2.149773 | -1.445427 |
| H | -0.256951 | -0.817841 | -2.963892 |
| H | -3.301793 | -3.845820 | -2.757114 |
| C | -1.379409 | 0.956546  | -1.281794 |
| C | -3.905283 | -0.317485 | 0.075789  |
| C | -4.729563 | -1.556417 | 0.555625  |
| H | -5.708441 | -1.261053 | 0.940163  |
| H | -4.190785 | -2.065310 | 1.356089  |
| C | -4.813834 | -2.485172 | -0.677878 |
| O | -2.196284 | 1.899775  | -1.787774 |
| C | -0.259338 | 2.869557  | -0.910682 |
| N | -0.309949 | 1.384367  | -0.688522 |
| C | -3.097694 | 0.356057  | 1.171849  |
| C | -1.892298 | -0.062810 | 1.754545  |
| C | -1.232228 | 0.788746  | 2.659654  |
| C | -1.776865 | 2.033290  | 2.984781  |
| C | -2.987595 | 2.438784  | 2.420912  |
| C | -3.641501 | 1.597290  | 1.518637  |
| H | -0.313340 | 0.461981  | 3.135727  |
| H | -3.408207 | 3.407888  | 2.672192  |
| C | -1.181385 | -1.261866 | 1.284979  |
| C | -4.843215 | 0.838997  | -0.414665 |
| H | -5.819770 | 0.454757  | -0.717111 |
| H | -4.394904 | 1.329716  | -1.278189 |
| C | -4.927902 | 1.836823  | 0.764085  |
| O | -1.792537 | -2.445180 | 1.245397  |
| C | 0.430541  | -2.572431 | 0.410696  |
| H | 0.753727  | -2.511522 | -0.631804 |
| N | 0.029367  | -1.211068 | 0.837243  |
| C | -0.900069 | -3.354744 | 0.525868  |
| H | -1.364358 | -3.560368 | -0.437855 |
| H | -0.829915 | -4.268883 | 1.113552  |
| C | -1.698956 | 3.184732  | -1.318514 |
| H | -2.322806 | 3.485590  | -0.471808 |

|    |           |           |           |
|----|-----------|-----------|-----------|
| H  | -1.801108 | 3.899995  | -2.133387 |
| H  | -1.243085 | 2.684639  | 3.667161  |
| H  | -5.697421 | -2.259701 | -1.288441 |
| H  | -4.876990 | -3.542437 | -0.405342 |
| H  | -5.782774 | 1.616869  | 1.416169  |
| H  | -5.041867 | 2.873267  | 0.433349  |
| H  | -1.170000 | -2.983326 | -3.712334 |
| H  | -0.006252 | 3.344215  | 0.033368  |
| Fe | 0.867655  | 0.617338  | 0.827194  |
| Cl | 1.569517  | 2.694860  | 1.739741  |
| C  | 2.508525  | 0.069109  | 0.155654  |
| C  | 2.896904  | -0.654689 | -1.037106 |
| C  | 2.226444  | -0.377316 | -2.244754 |
| C  | 3.912726  | -1.635254 | -1.029410 |
| C  | 2.545942  | -1.066023 | -3.406380 |
| H  | 1.471760  | 0.395859  | -2.237720 |
| C  | 4.210471  | -2.343108 | -2.190725 |
| H  | 4.461416  | -1.835333 | -0.117210 |
| C  | 3.530389  | -2.060974 | -3.378148 |
| H  | 2.035357  | -0.832717 | -4.335597 |
| H  | 4.983204  | -3.104546 | -2.174370 |
| H  | 3.774341  | -2.607323 | -4.283798 |
| C  | 3.264242  | -0.137754 | 1.451013  |
| O  | 4.444748  | -0.203624 | 1.682718  |
| O  | 2.285817  | -0.167579 | 2.409050  |
| C  | 2.670642  | 0.034511  | 3.790609  |
| H  | 2.750018  | 1.108723  | 3.964832  |
| H  | 1.875166  | -0.401990 | 4.392134  |
| H  | 3.619794  | -0.465599 | 3.977634  |
| C  | 1.578061  | -3.155531 | 1.257102  |
| H  | 2.413408  | -2.458058 | 1.167398  |
| C  | 2.040432  | -4.489901 | 0.660300  |
| H  | 2.890410  | -4.886442 | 1.222355  |
| H  | 1.249015  | -5.247049 | 0.692671  |
| H  | 2.352156  | -4.368433 | -0.382221 |
| C  | 1.223925  | -3.272744 | 2.742011  |
| H  | 0.871966  | -2.318488 | 3.141714  |
| H  | 0.447961  | -4.024113 | 2.921598  |
| H  | 2.103277  | -3.575032 | 3.317538  |
| C  | 0.819159  | 3.229046  | -1.951236 |
| H  | 1.731318  | 2.720846  | -1.623949 |
| C  | 1.084633  | 4.739293  | -1.915042 |
| H  | 1.879245  | 5.008091  | -2.616894 |
| H  | 0.194040  | 5.312903  | -2.198113 |
| H  | 1.390438  | 5.060533  | -0.914629 |
| C  | 0.486153  | 2.757431  | -3.372736 |
| H  | 0.231371  | 1.693934  | -3.414479 |
| H  | -0.355642 | 3.311794  | -3.800575 |
| H  | 1.345062  | 2.915121  | -4.031206 |
| O  | 3.486371  | 1.844866  | -0.341099 |
| C  | 4.915413  | 1.941279  | -0.358362 |

|   |          |          |           |
|---|----------|----------|-----------|
| H | 5.201668 | 2.904174 | -0.793540 |
| H | 5.338671 | 1.832744 | 0.642157  |
| H | 5.280560 | 1.134309 | -0.995913 |
| H | 3.081701 | 2.409856 | 0.360759  |

-----  
<sup>3</sup>(A-B)  
-----

Number of imaginary frequencies: 1    Electronic energy:    HF=-2583.2721148  
Zero-point correction=                    0.786232 (Hartree/Particle)  
Thermal correction to Energy=            0.833205  
Thermal correction to Enthalpy=         0.834149  
Thermal correction to Gibbs Free Energy= 0.705567  
Sum of electronic and zero-point Energies= -2582.485883  
Sum of electronic and thermal Energies= -2582.438910  
Sum of electronic and thermal Enthalpies= -2582.437966  
Sum of electronic and thermal Free Energies= -2582.566548

.....  
Cartesian Coordinates  
.....

|   |           |           |           |
|---|-----------|-----------|-----------|
| C | -3.055300 | -1.040446 | -1.025047 |
| C | -2.002053 | -0.320611 | -1.605813 |
| C | -1.291864 | -0.894895 | -2.670916 |
| C | -1.644420 | -2.152408 | -3.159908 |
| C | -2.708116 | -2.860968 | -2.590318 |
| C | -3.397827 | -2.305785 | -1.513672 |
| H | -0.484581 | -0.339832 | -3.132104 |
| H | -2.982876 | -3.838247 | -2.976454 |
| C | -1.687527 | 1.069444  | -1.200230 |
| C | -3.900687 | -0.671811 | 0.183996  |
| C | -4.524492 | -2.048586 | 0.589339  |
| H | -5.518104 | -1.921424 | 1.024820  |
| H | -3.890893 | -2.533311 | 1.332228  |
| C | -4.535750 | -2.890635 | -0.708383 |
| O | -2.637130 | 1.963805  | -1.520882 |
| C | -0.736770 | 3.024947  | -0.633032 |
| N | -0.620563 | 1.535523  | -0.640296 |
| C | -3.110271 | 0.002812  | 1.294503  |
| C | -1.819129 | -0.292612 | 1.763409  |
| C | -1.225777 | 0.544336  | 2.724104  |
| C | -1.916339 | 1.651867  | 3.216791  |
| C | -3.205182 | 1.937235  | 2.761181  |
| C | -3.793995 | 1.112144  | 1.801134  |
| H | -0.228738 | 0.322472  | 3.089159  |
| H | -3.739774 | 2.801780  | 3.143811  |
| C | -1.005100 | -1.367598 | 1.178946  |
| C | -5.011614 | 0.386964  | -0.133114 |
| H | -5.945831 | -0.096502 | -0.427115 |
| H | -4.687911 | 1.019013  | -0.959772 |
| C | -5.150473 | 1.241000  | 1.148213  |
| O | -1.515667 | -2.594627 | 1.086331  |
| C | 0.699869  | -2.525792 | 0.256116  |

|    |           |           |           |
|----|-----------|-----------|-----------|
| H  | 1.058569  | -2.413412 | -0.769222 |
| N  | 0.196134  | -1.205193 | 0.716834  |
| C  | -0.580471 | -3.386669 | 0.291390  |
| H  | -1.034240 | -3.525877 | -0.690128 |
| H  | -0.462051 | -4.345857 | 0.792873  |
| C  | -2.221228 | 3.243753  | -0.961695 |
| H  | -2.831556 | 3.422236  | -0.072370 |
| H  | -2.417697 | 4.010624  | -1.710196 |
| H  | -1.437989 | 2.294395  | 3.947431  |
| H  | -5.479800 | -2.770752 | -1.254871 |
| H  | -4.414502 | -3.960615 | -0.516327 |
| H  | -5.922443 | 0.839444  | 1.816906  |
| H  | -5.425287 | 2.278320  | 0.935693  |
| H  | -1.092346 | -2.577486 | -3.991846 |
| H  | -0.501195 | 3.379322  | 0.369454  |
| Fe | 0.896981  | 0.675497  | 0.584701  |
| Cl | 1.462482  | 2.562286  | 1.790348  |
| C  | 2.666278  | 0.226800  | 0.157279  |
| C  | 3.011026  | -0.495410 | -1.053776 |
| C  | 2.206228  | -0.310886 | -2.198946 |
| C  | 4.083402  | -1.410181 | -1.112723 |
| C  | 2.445866  | -1.039728 | -3.355327 |
| H  | 1.411051  | 0.424030  | -2.154683 |
| C  | 4.306754  | -2.153185 | -2.268760 |
| H  | 4.730945  | -1.535874 | -0.253240 |
| C  | 3.489892  | -1.972171 | -3.387754 |
| H  | 1.830359  | -0.884042 | -4.235694 |
| H  | 5.125542  | -2.864174 | -2.302698 |
| H  | 3.674131  | -2.547038 | -4.289799 |
| C  | 3.597436  | 0.137662  | 1.345464  |
| O  | 4.781052  | 0.401152  | 1.344817  |
| O  | 2.916147  | -0.278627 | 2.424426  |
| C  | 3.664273  | -0.340227 | 3.658741  |
| H  | 3.950424  | 0.668837  | 3.960338  |
| H  | 2.986175  | -0.784308 | 4.384630  |
| H  | 4.557473  | -0.953782 | 3.530546  |
| C  | 1.845155  | -3.064674 | 1.133889  |
| H  | 2.640064  | -2.318927 | 1.093524  |
| C  | 2.398197  | -4.361364 | 0.530867  |
| H  | 3.257992  | -4.713711 | 1.107412  |
| H  | 1.654900  | -5.166330 | 0.536261  |
| H  | 2.725373  | -4.208544 | -0.502791 |
| C  | 1.443954  | -3.226585 | 2.602610  |
| H  | 1.088362  | -2.281222 | 3.020261  |
| H  | 0.660143  | -3.979625 | 2.737153  |
| H  | 2.305258  | -3.549936 | 3.193978  |
| C  | 0.268081  | 3.646835  | -1.622349 |
| H  | 1.249698  | 3.259479  | -1.328703 |
| C  | 0.288372  | 5.170842  | -1.456757 |
| H  | 1.046839  | 5.618725  | -2.105016 |
| H  | -0.674072 | 5.620961  | -1.726786 |



|   |           |          |           |
|---|-----------|----------|-----------|
| H | 0.516201  | 5.452607 | -0.423898 |
| C | 0.017051  | 3.236463 | -3.077596 |
| H | 0.028099  | 2.149029 | -3.200910 |
| H | -0.943997 | 3.606410 | -3.450978 |
| H | 0.796025  | 3.648050 | -3.725496 |
| O | 3.267922  | 2.106877 | -0.511582 |
| C | 4.631290  | 2.365895 | -0.880777 |
| H | 4.688028  | 3.351104 | -1.353927 |
| H | 5.293927  | 2.305800 | -0.017201 |
| H | 4.909158  | 1.600247 | -1.606850 |
| H | 2.987432  | 2.620587 | 0.277310  |

---

**1CSSB**

---

Number of imaginary frequencies: 0    Electronic energy:    HF=-2583.2627798  
Zero-point correction=                    0.788620 (Hartree/Particle)  
Thermal correction to Energy=            0.834343  
Thermal correction to Enthalpy=         0.835288  
Thermal correction to Gibbs Free Energy= 0.713174  
Sum of electronic and zero-point Energies= -2582.474160  
Sum of electronic and thermal Energies= -2582.428436  
Sum of electronic and thermal Enthalpies= -2582.427492  
Sum of electronic and thermal Free Energies= -2582.549606

.....  
Cartesian Coordinates

.....

|   |           |           |           |
|---|-----------|-----------|-----------|
| C | -2.989185 | 1.020542  | 0.985951  |
| C | -1.816291 | 0.484735  | 1.536963  |
| C | -1.122341 | 1.227565  | 2.503184  |
| C | -1.605447 | 2.466518  | 2.924562  |
| C | -2.780691 | 2.994354  | 2.378642  |
| C | -3.453799 | 2.275453  | 1.392055  |
| H | -0.214839 | 0.827081  | 2.932945  |
| H | -3.150485 | 3.961383  | 2.706676  |
| C | -1.401368 | -0.909753 | 1.248691  |
| C | -3.857920 | 0.453305  | -0.127638 |
| C | -4.616471 | 1.724871  | -0.628218 |
| H | -5.598990 | 1.471947  | -1.033420 |
| H | -4.037582 | 2.208161  | -1.416280 |
| C | -4.686354 | 2.658154  | 0.603555  |
| O | -2.276957 | -1.803401 | 1.753916  |
| C | -0.403924 | -2.887346 | 0.895894  |
| N | -0.357598 | -1.402585 | 0.657665  |
| C | -3.062539 | -0.273473 | -1.198837 |
| C | -1.823580 | 0.077010  | -1.753386 |
| C | -1.176205 | -0.828111 | -2.616170 |
| C | -1.765529 | -2.056241 | -2.926443 |
| C | -3.010840 | -2.392236 | -2.391479 |
| C | -3.652323 | -1.498048 | -1.532345 |
| H | -0.235850 | -0.550394 | -3.081136 |
| H | -3.467635 | -3.347734 | -2.631529 |

|    |           |           |           |
|----|-----------|-----------|-----------|
| C  | -1.072937 | 1.253705  | -1.288136 |
| C  | -4.858086 | -0.651286 | 0.360718  |
| H  | -5.822004 | -0.218214 | 0.636410  |
| H  | -4.450282 | -1.147942 | 1.240654  |
| C  | -4.965449 | -1.663015 | -0.804433 |
| O  | -1.637925 | 2.463914  | -1.287371 |
| C  | 0.580037  | 2.524190  | -0.448553 |
| H  | 0.951189  | 2.494435  | 0.578146  |
| N  | 0.122801  | 1.158936  | -0.811432 |
| C  | -0.730816 | 3.337591  | -0.543261 |
| H  | -1.191594 | 3.527805  | 0.425397  |
| H  | -0.641311 | 4.265136  | -1.106274 |
| C  | -1.865172 | -3.111713 | 1.276709  |
| H  | -2.493307 | -3.360685 | 0.416387  |
| H  | -2.027179 | -3.828747 | 2.080289  |
| H  | -1.244938 | -2.746824 | -3.580490 |
| H  | -5.588881 | 2.467815  | 1.198257  |
| H  | -4.703649 | 3.716601  | 0.328873  |
| H  | -5.793547 | -1.411663 | -1.479367 |
| H  | -5.137603 | -2.687403 | -0.461463 |
| H  | -1.060224 | 3.022050  | 3.680724  |
| H  | -0.157853 | -3.391154 | -0.034104 |
| Fe | 0.872864  | -0.697020 | -0.807801 |
| Cl | 1.661204  | -2.873704 | -1.546664 |
| C  | 2.666585  | -0.377303 | -0.019994 |
| C  | 2.953282  | 0.607811  | 1.054556  |
| C  | 2.297655  | 0.456939  | 2.286791  |
| C  | 3.861782  | 1.664057  | 0.894829  |
| C  | 2.523771  | 1.354619  | 3.325039  |
| H  | 1.612561  | -0.373061 | 2.407144  |
| C  | 4.068669  | 2.579875  | 1.928746  |
| H  | 4.415913  | 1.768516  | -0.031439 |
| C  | 3.399534  | 2.430029  | 3.143133  |
| H  | 2.016695  | 1.221808  | 4.276120  |
| H  | 4.767971  | 3.397915  | 1.788877  |
| H  | 3.569256  | 3.136534  | 3.949193  |
| C  | 3.338709  | -0.169471 | -1.370130 |
| O  | 4.492539  | -0.247297 | -1.705845 |
| O  | 2.300133  | 0.012647  | -2.253419 |
| C  | 2.584751  | -0.159506 | -3.664393 |
| H  | 2.689480  | -1.226643 | -3.866000 |
| H  | 1.733556  | 0.260888  | -4.195817 |
| H  | 3.499787  | 0.375654  | -3.913383 |
| C  | 1.695303  | 3.046816  | -1.376987 |
| H  | 2.514143  | 2.328988  | -1.309533 |
| C  | 2.216775  | 4.393325  | -0.861568 |
| H  | 3.057242  | 4.736686  | -1.471414 |
| H  | 1.446877  | 5.171613  | -0.906007 |
| H  | 2.559790  | 4.313762  | 0.174191  |
| C  | 1.261651  | 3.128145  | -2.843992 |
| H  | 0.851653  | 2.177644  | -3.194067 |

|   |           |           |           |
|---|-----------|-----------|-----------|
| H | 0.503048  | 3.900700  | -3.006068 |
| H | 2.116731  | 3.379578  | -3.477865 |
| C | 0.615422  | -3.303922 | 1.975449  |
| H | 1.568872  | -2.865724 | 1.670200  |
| C | 0.771568  | -4.829690 | 1.976057  |
| H | 1.526736  | -5.141250 | 2.703517  |
| H | -0.164756 | -5.329953 | 2.249028  |
| H | 1.075146  | -5.195102 | 0.990176  |
| C | 0.284862  | -2.773576 | 3.376435  |
| H | 0.140722  | -1.689218 | 3.386854  |
| H | -0.622412 | -3.230443 | 3.784396  |
| H | 1.101102  | -3.003899 | 4.067155  |
| O | 3.221859  | -1.733742 | 0.481860  |
| C | 4.647791  | -1.928426 | 0.766554  |
| H | 4.720428  | -2.903527 | 1.246502  |
| H | 5.220410  | -1.876324 | -0.156966 |
| H | 4.934166  | -1.134488 | 1.452967  |
| H | 2.817630  | -2.407224 | -0.190407 |

---

**IOSSB**

---

Number of imaginary frequencies: 0    Electronic energy:    HF=-2583.2657474  
Zero-point correction=                    0.787879 (Hartree/Particle)  
Thermal correction to Energy=            0.834191  
Thermal correction to Enthalpy=         0.835135  
Thermal correction to Gibbs Free Energy= 0.710601  
Sum of electronic and zero-point Energies= -2582.477868  
Sum of electronic and thermal Energies= -2582.431557  
Sum of electronic and thermal Enthalpies= -2582.430612  
Sum of electronic and thermal Free Energies= -2582.555146

.....  
Cartesian Coordinates

.....  

|   |          |           |           |
|---|----------|-----------|-----------|
| C | 3.034257 | -0.979460 | 0.974636  |
| C | 1.908203 | -0.381820 | 1.557645  |
| C | 1.238271 | -1.059913 | 2.586667  |
| C | 1.702382 | -2.294990 | 3.039087  |
| C | 2.835556 | -2.881544 | 2.464807  |
| C | 3.483202 | -2.227352 | 1.418054  |
| H | 0.367328 | -0.609130 | 3.042637  |
| H | 3.192871 | -3.843792 | 2.819717  |
| C | 1.506028 | 1.004945  | 1.221407  |
| C | 3.858306 | -0.490339 | -0.207010 |
| C | 4.579302 | -1.798469 | -0.669875 |
| H | 5.553477 | -1.581802 | -1.114166 |
| H | 3.970554 | -2.305704 | -1.419179 |
| C | 4.671146 | -2.679078 | 0.598746  |
| O | 2.408340 | 1.919781  | 1.630014  |
| C | 0.486423 | 2.958162  | 0.802302  |
| N | 0.432230 | 1.465665  | 0.665138  |
| C | 3.018977 | 0.178953  | -1.282557 |

|    |           |           |           |
|----|-----------|-----------|-----------|
| C  | 1.761362  | -0.202185 | -1.773347 |
| C  | 1.087003  | 0.648455  | -2.671568 |
| C  | 1.665371  | 1.855557  | -3.073272 |
| C  | 2.925622  | 2.222424  | -2.598023 |
| C  | 3.596430  | 1.379930  | -1.709156 |
| H  | 0.135556  | 0.340364  | -3.095032 |
| H  | 3.374034  | 3.160885  | -2.910279 |
| C  | 1.022085  | -1.352086 | -1.227551 |
| C  | 4.887923  | 0.630419  | 0.170564  |
| H  | 5.862978  | 0.204167  | 0.415946  |
| H  | 4.531148  | 1.173600  | 1.045070  |
| C  | 4.938749  | 1.582739  | -1.047310 |
| O  | 1.589290  | -2.557671 | -1.159700 |
| C  | -0.626949 | -2.575318 | -0.311663 |
| H  | -0.991167 | -2.488569 | 0.714352  |
| N  | -0.174026 | -1.233811 | -0.755597 |
| C  | 0.684207  | -3.392470 | -0.367899 |
| H  | 1.149578  | -3.530543 | 0.607697  |
| H  | 0.594743  | -4.348211 | -0.881749 |
| C  | 1.963184  | 3.205733  | 1.118655  |
| H  | 2.555494  | 3.426918  | 0.226122  |
| H  | 2.150647  | 3.954205  | 1.887460  |
| H  | 1.123802  | 2.504930  | -3.751809 |
| H  | 5.601268  | -2.490375 | 1.149755  |
| H  | 4.648207  | -3.748379 | 0.370308  |
| H  | 5.737556  | 1.300779  | -1.745023 |
| H  | 5.121248  | 2.623308  | -0.763254 |
| H  | 1.177590  | -2.800355 | 3.843330  |
| H  | 0.209008  | 3.400669  | -0.151435 |
| Fe | -0.868909 | 0.673065  | -0.782820 |
| Cl | -1.632469 | 2.788496  | -1.684013 |
| C  | -2.688937 | 0.432264  | -0.020308 |
| C  | -2.944674 | -0.516299 | 1.095650  |
| C  | -2.219906 | -0.356729 | 2.287937  |
| C  | -3.877683 | -1.558983 | 1.003241  |
| C  | -2.405975 | -1.232592 | 3.352458  |
| H  | -1.510894 | 0.459563  | 2.354565  |
| C  | -4.045200 | -2.452834 | 2.063047  |
| H  | -4.480748 | -1.670008 | 0.108618  |
| C  | -3.309580 | -2.294126 | 3.237294  |
| H  | -1.846490 | -1.093909 | 4.272826  |
| H  | -4.764656 | -3.260561 | 1.975365  |
| H  | -3.448282 | -2.983349 | 4.063998  |
| C  | -3.444940 | 0.193137  | -1.318642 |
| O  | -4.613051 | 0.376963  | -1.566625 |
| O  | -2.528751 | -0.185630 | -2.251602 |
| C  | -2.977874 | -0.201398 | -3.627487 |
| H  | -3.203915 | 0.819756  | -3.938506 |
| H  | -2.149746 | -0.611344 | -4.201748 |
| H  | -3.863342 | -0.830156 | -3.720430 |
| C  | -1.751064 | -3.142253 | -1.201918 |

|   |           |           |           |
|---|-----------|-----------|-----------|
| H | -2.566073 | -2.417851 | -1.160115 |
| C | -2.266830 | -4.462529 | -0.618061 |
| H | -3.114910 | -4.833139 | -1.200836 |
| H | -1.498394 | -5.243493 | -0.635073 |
| H | -2.597541 | -4.334181 | 0.416936  |
| C | -1.330749 | -3.290575 | -2.667484 |
| H | -0.944403 | -2.350147 | -3.068793 |
| H | -0.558966 | -4.056047 | -2.799501 |
| H | -2.187230 | -3.589822 | -3.278315 |
| C | -0.502579 | 3.443898  | 1.880891  |
| H | -1.469172 | 3.007235  | 1.613336  |
| C | -0.634192 | 4.970444  | 1.814511  |
| H | -1.374910 | 5.326768  | 2.536205  |
| H | 0.313197  | 5.467186  | 2.053364  |
| H | -0.944583 | 5.297300  | 0.817120  |
| C | -0.150626 | 2.969604  | 3.296089  |
| H | -0.047022 | 1.881978  | 3.352559  |
| H | 0.784457  | 3.411030  | 3.655744  |
| H | -0.936976 | 3.262043  | 3.997799  |
| O | -3.163921 | 1.820480  | 0.464277  |
| C | -4.558974 | 2.082006  | 0.842742  |
| H | -4.555482 | 3.069272  | 1.302876  |
| H | -5.194818 | 2.030774  | -0.037645 |
| H | -4.825758 | 1.315935  | 1.567565  |
| H | -2.781868 | 2.451735  | -0.254335 |

-----  
<sup>3</sup>B  
 -----

Number of imaginary frequencies: 0    Electronic energy:    HF=-2583.277967  
 Zero-point correction=                    0.787701 (Hartree/Particle)  
 Thermal correction to Energy=            0.834407  
 Thermal correction to Enthalpy=         0.835351  
 Thermal correction to Gibbs Free Energy= 0.707703  
 Sum of electronic and zero-point Energies= -2582.490266  
 Sum of electronic and thermal Energies= -2582.443560  
 Sum of electronic and thermal Enthalpies= -2582.442616  
 Sum of electronic and thermal Free Energies= -2582.570264

.....  
 Cartesian Coordinates  
 .....

|   |          |           |           |
|---|----------|-----------|-----------|
| C | 3.036972 | -1.110308 | 0.961027  |
| C | 2.017801 | -0.356793 | 1.558838  |
| C | 1.313093 | -0.900207 | 2.643208  |
| C | 1.648371 | -2.159142 | 3.140931  |
| C | 2.682636 | -2.899969 | 2.557389  |
| C | 3.357824 | -2.378577 | 1.454631  |
| H | 0.523768 | -0.322172 | 3.108367  |
| H | 2.940907 | -3.879322 | 2.949571  |
| C | 1.753026 | 1.040489  | 1.149509  |
| C | 3.855089 | -0.777934 | -0.276865 |
| C | 4.419742 | -2.178081 | -0.689057 |

|    |           |           |           |
|----|-----------|-----------|-----------|
| H  | 5.401598  | -2.086999 | -1.158984 |
| H  | 3.745878  | -2.650052 | -1.403559 |
| C  | 4.450459  | -3.005895 | 0.618535  |
| O  | 2.753131  | 1.890033  | 1.442085  |
| C  | 0.898212  | 3.035329  | 0.575344  |
| N  | 0.701509  | 1.553951  | 0.602098  |
| C  | 3.052845  | -0.075188 | -1.364080 |
| C  | 1.733835  | -0.314425 | -1.787233 |
| C  | 1.144695  | 0.548381  | -2.727520 |
| C  | 1.861675  | 1.628071  | -3.242910 |
| C  | 3.176488  | 1.858823  | -2.831526 |
| C  | 3.763409  | 1.006840  | -1.894596 |
| H  | 0.129343  | 0.363808  | -3.062195 |
| H  | 3.733585  | 2.700793  | -3.232075 |
| C  | 0.899695  | -1.363320 | -1.182448 |
| C  | 5.016388  | 0.237985  | -0.001089 |
| H  | 5.940095  | -0.281097 | 0.263922  |
| H  | 4.746173  | 0.885114  | 0.832836  |
| C  | 5.146318  | 1.080279  | -1.290610 |
| O  | 1.405290  | -2.593298 | -1.078781 |
| C  | -0.801114 | -2.506910 | -0.244437 |
| H  | -1.187755 | -2.387395 | 0.769012  |
| N  | -0.295371 | -1.182219 | -0.710537 |
| C  | 0.483651  | -3.357894 | -0.245426 |
| H  | 0.943369  | -3.453142 | 0.738338  |
| H  | 0.370645  | -4.337954 | -0.705371 |
| C  | 2.399055  | 3.177284  | 0.862939  |
| H  | 2.994213  | 3.299981  | -0.045900 |
| H  | 2.658012  | 3.949124  | 1.586869  |
| H  | 1.387526  | 2.289217  | -3.959824 |
| H  | 5.416182  | -2.908838 | 1.130626  |
| H  | 4.290579  | -4.073690 | 0.443398  |
| H  | 5.876204  | 0.642978  | -1.983736 |
| H  | 5.472918  | 2.105741  | -1.094062 |
| H  | 1.103549  | -2.562537 | 3.988262  |
| H  | 0.654559  | 3.394742  | -0.422819 |
| Fe | -0.907279 | 0.747533  | -0.520111 |
| Cl | -1.481785 | 2.727056  | -1.640767 |
| C  | -2.851359 | 0.584340  | -0.010826 |
| C  | -3.063077 | -0.391320 | 1.091476  |
| C  | -2.269647 | -0.280052 | 2.248148  |
| C  | -3.996483 | -1.433781 | 1.008418  |
| C  | -2.394011 | -1.201189 | 3.283792  |
| H  | -1.556809 | 0.535270  | 2.318031  |
| C  | -4.108402 | -2.365208 | 2.041396  |
| H  | -4.629808 | -1.526309 | 0.132786  |
| C  | -3.307336 | -2.254466 | 3.178727  |
| H  | -1.780238 | -1.100844 | 4.173645  |
| H  | -4.831964 | -3.169949 | 1.961472  |
| H  | -3.401775 | -2.976372 | 3.983323  |
| C  | -3.745991 | 0.521446  | -1.225110 |

|   |           |           |           |
|---|-----------|-----------|-----------|
| O | -4.633120 | 1.309776  | -1.480412 |
| O | -3.393669 | -0.487153 | -2.035970 |
| C | -4.144389 | -0.587045 | -3.267439 |
| H | -3.994331 | 0.313987  | -3.864291 |
| H | -3.744679 | -1.462686 | -3.774884 |
| H | -5.207986 | -0.708986 | -3.055612 |
| C | -1.911495 | -3.079233 | -1.146365 |
| H | -2.733385 | -2.367325 | -1.106600 |
| C | -2.412553 | -4.412681 | -0.577440 |
| H | -3.279188 | -4.764291 | -1.144707 |
| H | -1.653064 | -5.200280 | -0.633649 |
| H | -2.715271 | -4.308851 | 0.469169  |
| C | -1.481618 | -3.204409 | -2.611494 |
| H | -1.201992 | -2.231975 | -3.026236 |
| H | -0.634771 | -3.887162 | -2.741175 |
| H | -2.305407 | -3.600518 | -3.212817 |
| C | -0.037287 | 3.724531  | 1.588518  |
| H | -1.048424 | 3.398797  | 1.320856  |
| C | 0.030067  | 5.246070  | 1.414247  |
| H | -0.680852 | 5.743276  | 2.080322  |
| H | 1.025119  | 5.636505  | 1.656140  |
| H | -0.207415 | 5.536544  | 0.386131  |
| C | 0.223328  | 3.302640  | 3.038666  |
| H | 0.139801  | 2.219050  | 3.166538  |
| H | 1.218397  | 3.605025  | 3.381635  |
| H | -0.504489 | 3.771850  | 3.706836  |
| O | -3.084835 | 1.989461  | 0.581674  |
| C | -4.370572 | 2.372419  | 1.194575  |
| H | -4.190617 | 3.340251  | 1.660301  |
| H | -5.132953 | 2.408505  | 0.422037  |
| H | -4.579116 | 1.613945  | 1.945597  |
| H | -2.763922 | 2.600339  | -0.164375 |

-----  
**(R)-TS(Df-P)<sub>3w</sub>-L3\***  
 -----

Number of imaginary frequencies: 1    Electronic energy:    HF=-2999.6073214  
 Zero-point correction=                    0.823660 (Hartree/Particle)  
 Thermal correction to Energy=            0.875680  
 Thermal correction to Enthalpy=         0.876624  
 Thermal correction to Gibbs Free Energy= 0.735913  
 Sum of electronic and zero-point Energies= -2998.783661  
 Sum of electronic and thermal Energies= -2998.731642  
 Sum of electronic and thermal Enthalpies= -2998.730697  
 Sum of electronic and thermal Free Energies= -2998.871408

.....  
 Cartesian Coordinates  
 .....

|   |           |           |          |
|---|-----------|-----------|----------|
| C | -2.960954 | -0.991296 | 1.895356 |
| C | -1.683216 | -1.380120 | 1.467714 |
| C | -0.568886 | -1.098279 | 2.275930 |
| C | -0.739496 | -0.470110 | 3.509760 |
| C | -2.017200 | -0.104740 | 3.948036 |
| C | -3.120514 | -0.359897 | 3.133392 |

|    |           |           |           |
|----|-----------|-----------|-----------|
| H  | 0.421586  | -1.377468 | 1.931319  |
| H  | -2.145461 | 0.383122  | 4.910171  |
| C  | -1.444238 | -1.980013 | 0.142272  |
| C  | -4.271151 | -1.040818 | 1.123402  |
| C  | -5.192436 | -0.079461 | 1.949262  |
| H  | -6.226376 | -0.431199 | 1.953148  |
| H  | -5.179910 | 0.914136  | 1.502782  |
| C  | -4.574371 | -0.019018 | 3.367063  |
| O  | -2.065995 | -3.128264 | -0.175419 |
| C  | -0.569005 | -2.454902 | -1.877717 |
| N  | -0.651080 | -1.490188 | -0.744556 |
| C  | -4.096490 | -0.639419 | -0.335644 |
| C  | -3.268703 | 0.358477  | -0.874265 |
| C  | -3.119250 | 0.451491  | -2.266005 |
| C  | -3.825606 | -0.410358 | -3.105159 |
| C  | -4.676195 | -1.383453 | -2.570178 |
| C  | -4.791613 | -1.504727 | -1.185302 |
| H  | -2.443659 | 1.187780  | -2.685174 |
| H  | -5.224270 | -2.051474 | -3.228530 |
| C  | -2.547086 | 1.316548  | -0.014244 |
| C  | -4.890733 | -2.473817 | 1.005342  |
| H  | -5.578318 | -2.677569 | 1.829286  |
| H  | -4.096443 | -3.219543 | 1.037935  |
| C  | -5.576702 | -2.515169 | -0.380515 |
| O  | -3.308719 | 2.098586  | 0.766648  |
| C  | -1.023591 | 2.655215  | 0.955867  |
| H  | -0.292383 | 2.346975  | 1.704914  |
| N  | -1.271558 | 1.512055  | 0.048824  |
| C  | -2.412259 | 2.876708  | 1.605346  |
| H  | -2.472628 | 2.465730  | 2.615818  |
| H  | -2.750670 | 3.912043  | 1.588337  |
| C  | -1.753853 | -3.394820 | -1.578052 |
| H  | -2.641393 | -3.138883 | -2.159324 |
| H  | -1.525058 | -4.455172 | -1.673667 |
| H  | -3.707669 | -0.322369 | -4.180136 |
| H  | -5.026935 | -0.764611 | 4.032985  |
| H  | -4.712609 | 0.955547  | 3.844803  |
| H  | -6.627979 | -2.206951 | -0.315908 |
| H  | -5.565681 | -3.514690 | -0.824730 |
| H  | 0.126896  | -0.270102 | 4.132098  |
| H  | -0.718719 | -1.902640 | -2.806646 |
| Fe | 0.363424  | 0.374812  | -0.681347 |
| Cl | 0.437586  | 0.874727  | -2.971938 |
| C  | 3.161844  | -0.255881 | 0.506595  |
| C  | 3.980975  | -1.143449 | 1.378199  |
| C  | 5.247427  | -0.741930 | 1.835189  |
| C  | 3.524792  | -2.429402 | 1.705959  |
| C  | 6.019491  | -1.595085 | 2.619688  |
| H  | 5.621219  | 0.244722  | 1.584563  |
| C  | 4.306864  | -3.283039 | 2.483758  |
| H  | 2.560157  | -2.762384 | 1.343267  |
| C  | 5.555604  | -2.871179 | 2.947133  |
| H  | 6.992800  | -1.264692 | 2.969554  |
| H  | 3.934688  | -4.273407 | 2.729398  |
| H  | 6.163712  | -3.536126 | 3.551825  |
| C  | 2.776647  | 1.064679  | 0.883392  |



|   |           |           |           |
|---|-----------|-----------|-----------|
| O | 1.705514  | 1.604540  | 0.453777  |
| O | 3.623972  | 1.744290  | 1.649597  |
| C | 3.292090  | 3.103840  | 1.997717  |
| H | 3.347123  | 3.744550  | 1.116322  |
| H | 2.290699  | 3.151478  | 2.429585  |
| H | 4.038229  | 3.395499  | 2.734875  |
| O | 1.999168  | -0.892384 | -0.049155 |
| H | 2.116368  | 3.076552  | -0.596505 |
| H | 4.000744  | 0.010644  | -0.720897 |
| O | 2.688194  | 3.624521  | -1.169355 |
| H | 2.132405  | 4.369043  | -1.444917 |
| H | 3.993355  | 0.930794  | -2.347638 |
| O | 4.481320  | 0.068914  | -1.755996 |
| H | 5.436821  | 0.189906  | -1.664279 |
| O | 3.379612  | 1.847842  | -2.958647 |
| H | 2.494336  | 1.505391  | -3.213166 |
| H | 3.174787  | 2.609525  | -2.337290 |
| H | 2.253058  | -1.528155 | -0.741407 |
| C | 0.807113  | -3.090291 | -1.864821 |
| C | 1.820472  | -2.557255 | -2.673007 |
| C | 1.123120  | -4.110307 | -0.957375 |
| C | 3.133301  | -3.028312 | -2.564440 |
| H | 1.582445  | -1.754805 | -3.364261 |
| C | 2.428422  | -4.591159 | -0.862147 |
| H | 0.354937  | -4.518707 | -0.306994 |
| C | 3.438489  | -4.044309 | -1.657050 |
| H | 3.912414  | -2.590169 | -3.178563 |
| H | 2.662845  | -5.379100 | -0.153867 |
| H | 4.457050  | -4.406250 | -1.565655 |
| C | -0.490402 | 3.865940  | 0.215499  |
| C | -0.655808 | 4.019012  | -1.163598 |
| C | 0.160618  | 4.872364  | 0.941832  |
| C | -0.178159 | 5.164404  | -1.807888 |
| H | -1.127203 | 3.234246  | -1.742224 |
| C | 0.634833  | 6.016122  | 0.303373  |
| H | 0.297287  | 4.757732  | 2.014286  |
| C | 0.466659  | 6.165906  | -1.077766 |
| H | -0.311340 | 5.270437  | -2.879944 |
| H | 1.137618  | 6.788128  | 0.876992  |
| H | 0.832000  | 7.057423  | -1.577455 |

-----  
**(S)-TS(Df-P)<sub>3w-L3</sub>\***  
 -----

Number of imaginary frequencies: 1    Electronic energy:    HF=-2999.6018285  
 Zero-point correction=                    0.823135 (Hartree/Particle)  
 Thermal correction to Energy=            0.875463  
 Thermal correction to Enthalpy=         0.876407  
 Thermal correction to Gibbs Free Energy= 0.733973  
 Sum of electronic and zero-point Energies= -2998.778693  
 Sum of electronic and thermal Energies= -2998.726365  
 Sum of electronic and thermal Enthalpies= -2998.725421  
 Sum of electronic and thermal Free Energies= -2998.867856

-----  
 Cartesian Coordinates  
 -----

|   |           |           |           |
|---|-----------|-----------|-----------|
| C | -2.606584 | -1.737313 | -1.662042 |
|---|-----------|-----------|-----------|

|    |           |           |           |
|----|-----------|-----------|-----------|
| C  | -1.713290 | -0.667954 | -1.828701 |
| C  | -0.432490 | -0.914045 | -2.346808 |
| C  | -0.059830 | -2.204579 | -2.724048 |
| C  | -0.956750 | -3.267092 | -2.575998 |
| C  | -2.223320 | -3.028129 | -2.041060 |
| H  | 0.263650  | -0.088714 | -2.452135 |
| H  | -0.664781 | -4.271897 | -2.867945 |
| C  | -2.023929 | 0.681644  | -1.324288 |
| C  | -3.976140 | -1.736073 | -0.995621 |
| C  | -4.241224 | -3.262260 | -0.758417 |
| H  | -5.300106 | -3.501089 | -0.878748 |
| H  | -3.954489 | -3.530725 | 0.257772  |
| C  | -3.338172 | -4.011104 | -1.767261 |
| O  | -3.135393 | 1.297032  | -1.748097 |
| C  | -1.976976 | 2.579070  | -0.108353 |
| N  | -1.305890 | 1.305995  | -0.457415 |
| C  | -4.011747 | -0.897437 | 0.276053  |
| C  | -3.036072 | -0.789956 | 1.278414  |
| C  | -3.198901 | 0.153256  | 2.302759  |
| C  | -4.344243 | 0.950560  | 2.341277  |
| C  | -5.333922 | 0.821611  | 1.361162  |
| C  | -5.153375 | -0.092248 | 0.323219  |
| H  | -2.426252 | 0.265363  | 3.054875  |
| H  | -6.226724 | 1.439140  | 1.401943  |
| C  | -1.863096 | -1.691580 | 1.306572  |
| C  | -5.101487 | -1.080091 | -1.865637 |
| H  | -5.613804 | -1.826786 | -2.476465 |
| H  | -4.662245 | -0.342716 | -2.537180 |
| C  | -6.044201 | -0.368737 | -0.866038 |
| O  | -2.147213 | -2.976586 | 1.582495  |
| C  | 0.167843  | -2.651169 | 1.224198  |
| H  | 0.564031  | -2.865999 | 0.228117  |
| N  | -0.623406 | -1.397963 | 1.116249  |
| C  | -0.894168 | -3.708484 | 1.617799  |
| H  | -0.967294 | -4.534139 | 0.908589  |
| H  | -0.760701 | -4.094119 | 2.630259  |
| C  | -3.236655 | 2.555576  | -1.019068 |
| H  | -4.168718 | 2.532503  | -0.454443 |
| H  | -3.254077 | 3.361501  | -1.753738 |
| H  | -4.464243 | 1.671837  | 3.143158  |
| H  | -3.874230 | -4.230239 | -2.699379 |
| H  | -2.977743 | -4.968706 | -1.379273 |
| H  | -6.875112 | -1.019754 | -0.566146 |
| H  | -6.488601 | 0.539185  | -1.284344 |
| H  | 0.934106  | -2.377732 | -3.122432 |
| H  | -2.261426 | 2.509783  | 0.944261  |
| Fe | 0.330488  | 0.485359  | 0.586585  |
| Cl | 0.164753  | 1.603533  | 2.631642  |
| C  | -1.101615 | 3.795577  | -0.300751 |
| C  | -0.903320 | 4.686658  | 0.756643  |
| C  | -0.526129 | 4.073658  | -1.546865 |
| C  | -0.158211 | 5.855487  | 0.568205  |
| H  | -1.329473 | 4.464257  | 1.729847  |
| C  | 0.220692  | 5.234219  | -1.737720 |
| H  | -0.662611 | 3.375629  | -2.368063 |
| C  | 0.402618  | 6.132201  | -0.681412 |

|   |           |           |           |
|---|-----------|-----------|-----------|
| H | -0.028331 | 6.551505  | 1.391387  |
| H | 0.655230  | 5.445605  | -2.709739 |
| H | 0.975195  | 7.041695  | -0.832520 |
| C | 1.317066  | -2.528834 | 2.201089  |
| C | 1.196297  | -1.750665 | 3.359185  |
| C | 2.531543  | -3.178164 | 1.933940  |
| C | 2.276341  | -1.619515 | 4.231359  |
| H | 0.273354  | -1.218260 | 3.557631  |
| C | 3.610731  | -3.046816 | 2.810309  |
| H | 2.638273  | -3.775111 | 1.032446  |
| C | 3.484338  | -2.264671 | 3.958819  |
| H | 2.175050  | -1.004051 | 5.119508  |
| H | 4.546885  | -3.549244 | 2.589618  |
| H | 4.324521  | -2.154997 | 4.636785  |
| C | 3.119896  | -0.114178 | -0.667234 |
| C | 3.890373  | -1.085809 | -1.490383 |
| C | 5.100950  | -0.717094 | -2.099749 |
| C | 3.443912  | -2.408957 | -1.636594 |
| C | 5.825393  | -1.639493 | -2.851179 |
| H | 5.467677  | 0.297443  | -1.991747 |
| C | 4.177616  | -3.331563 | -2.382435 |
| H | 2.509892  | -2.706681 | -1.176067 |
| C | 5.371113  | -2.952089 | -2.995596 |
| H | 6.755856  | -1.332881 | -3.319161 |
| H | 3.812425  | -4.349339 | -2.485708 |
| H | 5.943234  | -3.669399 | -3.574825 |
| C | 2.644584  | 1.129294  | -1.181309 |
| O | 1.569127  | 1.661058  | -0.764247 |
| O | 3.416095  | 1.742810  | -2.073275 |
| C | 2.989975  | 3.032103  | -2.561099 |
| H | 3.043921  | 3.773542  | -1.762276 |
| H | 1.969462  | 2.974216  | -2.942575 |
| H | 3.686406  | 3.274630  | -3.361901 |
| O | 2.037971  | -0.708513 | 0.077782  |
| H | 1.913930  | 3.221111  | 0.083661  |
| H | 3.980345  | 0.323396  | 0.498028  |
| O | 2.446600  | 3.857200  | 0.603873  |
| H | 1.841900  | 4.589104  | 0.797138  |
| H | 3.833356  | 1.363869  | 2.056318  |
| O | 4.389237  | 0.475199  | 1.548584  |
| H | 5.346365  | 0.610368  | 1.519344  |
| O | 3.181960  | 2.301706  | 2.556688  |
| H | 2.303889  | 1.982812  | 2.859485  |
| H | 2.954468  | 2.989843  | 1.855938  |
| H | 2.399458  | -1.229504 | 0.817302  |

---

**(R)-TS(Df-P)<sub>3w</sub>-L2\***

---

|                                            |                             |                  |
|--------------------------------------------|-----------------------------|------------------|
| Number of imaginary frequencies: 1         | Electronic energy:          | HF=-2923.1410912 |
| Zero-point correction=                     | 0.798109 (Hartree/Particle) |                  |
| Thermal correction to Energy=              | 0.847861                    |                  |
| Thermal correction to Enthalpy=            | 0.848805                    |                  |
| Thermal correction to Gibbs Free Energy=   | 0.712018                    |                  |
| Sum of electronic and zero-point Energies= | -2922.342982                |                  |
| Sum of electronic and thermal Energies=    | -2922.293230                |                  |
| Sum of electronic and thermal Enthalpies=  | -2922.292286                |                  |

Sum of electronic and thermal Free Energies= -2922.429073

.....  
Cartesian Coordinates  
.....

|    |           |           |           |
|----|-----------|-----------|-----------|
| C  | 2.466828  | -2.111784 | -1.174257 |
| C  | 1.334577  | -1.361979 | -1.516989 |
| C  | 0.118366  | -2.021369 | -1.755820 |
| C  | 0.052373  | -3.412297 | -1.692518 |
| C  | 1.180495  | -4.161462 | -1.344219 |
| C  | 2.377985  | -3.503772 | -1.063396 |
| H  | -0.763743 | -1.444599 | -2.006282 |
| H  | 1.121166  | -5.244639 | -1.286346 |
| C  | 1.369076  | 0.099447  | -1.682555 |
| C  | 3.875654  | -1.633096 | -0.873781 |
| C  | 4.467295  | -2.852705 | -0.096293 |
| H  | 5.551137  | -2.918658 | -0.216461 |
| H  | 4.255139  | -2.740822 | 0.969209  |
| C  | 3.712915  | -4.083215 | -0.650256 |
| O  | 2.235650  | 0.597866  | -2.577170 |
| C  | 0.767910  | 2.255556  | -1.819180 |
| N  | 0.581523  | 0.954287  | -1.112206 |
| C  | 3.973200  | -0.320365 | -0.118829 |
| C  | 3.224973  | 0.120791  | 0.978426  |
| C  | 3.482504  | 1.389370  | 1.521211  |
| C  | 4.461955  | 2.210669  | 0.963329  |
| C  | 5.207479  | 1.771950  | -0.134380 |
| C  | 4.958519  | 0.508568  | -0.668416 |
| H  | 2.913689  | 1.722184  | 2.383961  |
| H  | 5.975253  | 2.409026  | -0.563560 |
| C  | 2.232803  | -0.718945 | 1.688843  |
| C  | 4.688701  | -1.336049 | -2.181079 |
| H  | 5.209298  | -2.228374 | -2.536105 |
| H  | 4.004891  | -1.012389 | -2.966137 |
| C  | 5.648073  | -0.178780 | -1.823372 |
| O  | 2.765361  | -1.632695 | 2.521688  |
| C  | 0.435207  | -1.461654 | 2.806153  |
| N  | 0.950111  | -0.599600 | 1.693637  |
| C  | 1.657714  | -2.334508 | 3.148757  |
| H  | 1.609720  | -3.337082 | 2.717291  |
| H  | 1.863392  | -2.402628 | 4.216375  |
| C  | 2.149230  | 2.051808  | -2.459072 |
| H  | 2.963470  | 2.379057  | -1.805766 |
| H  | 2.256205  | 2.476782  | -3.455457 |
| H  | 4.642550  | 3.192461  | 1.388037  |
| H  | 4.224847  | -4.506070 | -1.524014 |
| H  | 3.621212  | -4.889255 | 0.083636  |
| H  | 6.627110  | -0.553860 | -1.499390 |
| H  | 5.830571  | 0.490655  | -2.669160 |
| H  | -0.886968 | -3.908893 | -1.910328 |
| Fe | -0.436954 | 0.800726  | 0.730447  |
| Cl | -0.768309 | 1.726847  | 2.895539  |
| H  | 0.209750  | -0.773643 | 3.625853  |
| H  | -0.002314 | 2.296864  | -2.599440 |
| C  | 0.635344  | 3.478914  | -0.953367 |
| C  | 1.044485  | 3.466152  | 0.380578  |
| C  | 0.081856  | 4.647497  | -1.486220 |

|   |           |           |           |
|---|-----------|-----------|-----------|
| C | 0.875110  | 4.591807  | 1.186157  |
| H | 1.506471  | 2.577308  | 0.792894  |
| C | -0.070563 | 5.782138  | -0.690262 |
| H | -0.235846 | 4.667596  | -2.525902 |
| C | 0.317618  | 5.753327  | 0.651580  |
| H | 1.168274  | 4.552670  | 2.229990  |
| H | -0.500048 | 6.684811  | -1.113316 |
| H | 0.185591  | 6.631666  | 1.275135  |
| C | -0.821214 | -2.225015 | 2.467821  |
| C | -0.801665 | -3.311813 | 1.586948  |
| C | -2.042193 | -1.822396 | 3.027678  |
| C | -1.977149 | -3.996828 | 1.284054  |
| H | 0.126614  | -3.612536 | 1.115100  |
| C | -3.225055 | -2.497802 | 2.708457  |
| H | -2.064246 | -0.966876 | 3.695519  |
| C | -3.192568 | -3.590664 | 1.839245  |
| H | -1.947853 | -4.838135 | 0.599002  |
| H | -4.164488 | -2.169798 | 3.141106  |
| H | -4.108455 | -4.114097 | 1.586826  |
| C | -3.169325 | 0.066565  | -0.459238 |
| C | -3.933817 | -0.911676 | -1.266565 |
| C | -5.144143 | -0.568669 | -1.896756 |
| C | -3.489392 | -2.240959 | -1.361146 |
| C | -5.862087 | -1.519202 | -2.617493 |
| H | -5.515281 | 0.446963  | -1.832047 |
| C | -4.218596 | -3.190441 | -2.075715 |
| H | -2.573457 | -2.528487 | -0.864781 |
| C | -5.406822 | -2.836367 | -2.712577 |
| H | -6.789488 | -1.229963 | -3.102478 |
| H | -3.853918 | -4.212398 | -2.133686 |
| H | -5.974548 | -3.574118 | -3.270055 |
| C | -2.868431 | 1.398109  | -0.836605 |
| O | -1.953146 | 2.082643  | -0.272326 |
| O | -3.682205 | 1.978071  | -1.730367 |
| C | -3.529486 | 3.394454  | -1.934206 |
| H | -3.912432 | 3.949241  | -1.071695 |
| H | -2.483307 | 3.657414  | -2.089847 |
| H | -4.126771 | 3.623622  | -2.815319 |
| O | -2.048013 | -0.488917 | 0.249311  |
| H | -4.093139 | 0.611100  | 0.750558  |
| H | -3.953694 | 2.054133  | 1.813116  |
| O | -4.513734 | 1.042729  | 1.666201  |
| H | -5.467806 | 1.165753  | 1.554524  |
| O | -3.232303 | 3.092205  | 1.861541  |
| H | -2.518682 | 2.879725  | 2.512792  |
| H | -2.724620 | 3.048209  | 1.012929  |
| H | -2.351938 | -1.043092 | 0.988877  |

---

**(S)-TS(D<sub>h</sub>-P)<sub>3w</sub>-L2\***

---

|                                            |                             |                 |
|--------------------------------------------|-----------------------------|-----------------|
| Number of imaginary frequencies: 1         | Electronic energy:          | HF=-2923.137764 |
| Zero-point correction=                     | 0.798014 (Hartree/Particle) |                 |
| Thermal correction to Energy=              | 0.847886                    |                 |
| Thermal correction to Enthalpy=            | 0.848830                    |                 |
| Thermal correction to Gibbs Free Energy=   | 0.712329                    |                 |
| Sum of electronic and zero-point Energies= | -2922.339750                |                 |

|                                              |              |
|----------------------------------------------|--------------|
| Sum of electronic and thermal Energies=      | -2922.289878 |
| Sum of electronic and thermal Enthalpies=    | -2922.288934 |
| Sum of electronic and thermal Free Energies= | -2922.425435 |

.....  
 Cartesian Coordinates  
 .....

|    |           |           |           |
|----|-----------|-----------|-----------|
| C  | -2.908060 | 0.220213  | -1.801656 |
| C  | -1.515287 | 0.124884  | -1.897041 |
| C  | -0.791286 | 1.181198  | -2.471427 |
| C  | -1.460337 | 2.297514  | -2.972428 |
| C  | -2.850184 | 2.401293  | -2.861810 |
| C  | -3.566076 | 1.369331  | -2.255766 |
| H  | 0.287079  | 1.106384  | -2.548801 |
| H  | -3.364679 | 3.279128  | -3.241714 |
| C  | -0.776098 | -1.078956 | -1.476463 |
| C  | -3.906020 | -0.807344 | -1.299581 |
| C  | -5.157782 | 0.081325  | -1.014477 |
| H  | -6.085093 | -0.489398 | -1.103132 |
| H  | -5.102031 | 0.469812  | 0.005110  |
| C  | -5.056227 | 1.247561  | -2.024595 |
| O  | -1.050715 | -2.217764 | -2.127080 |
| C  | 0.814543  | -2.469843 | -0.724100 |
| N  | 0.169535  | -1.129992 | -0.596569 |
| C  | -3.473132 | -1.658267 | -0.118645 |
| C  | -2.856087 | -1.269136 | 1.076709  |
| C  | -2.558243 | -2.240064 | 2.045130  |
| C  | -2.848514 | -3.583990 | 1.815210  |
| C  | -3.465598 | -3.974226 | 0.624698  |
| C  | -3.778358 | -3.008929 | -0.331025 |
| H  | -2.101391 | -1.934012 | 2.980845  |
| H  | -3.706463 | -5.018634 | 0.449612  |
| C  | -2.593188 | 0.139850  | 1.453845  |
| C  | -4.201734 | -1.881176 | -2.405631 |
| H  | -5.028104 | -1.570230 | -3.048795 |
| H  | -3.318133 | -2.003974 | -3.032803 |
| C  | -4.483915 | -3.198237 | -1.652174 |
| O  | -3.661317 | 0.794374  | 1.939558  |
| C  | -1.679300 | 2.057329  | 2.194997  |
| N  | -1.464048 | 0.762244  | 1.480970  |
| C  | -3.219620 | 2.131498  | 2.303411  |
| H  | -3.658980 | 2.834395  | 1.591879  |
| H  | -3.583307 | 2.343171  | 3.308521  |
| C  | -0.278783 | -3.264006 | -1.459406 |
| H  | -0.953278 | -3.779548 | -0.769702 |
| H  | 0.092124  | -3.945965 | -2.222499 |
| H  | -2.596440 | -4.322498 | 2.568638  |
| H  | -5.563077 | 1.005667  | -2.967232 |
| H  | -5.507115 | 2.171701  | -1.651253 |
| H  | -5.557959 | -3.341726 | -1.479136 |
| H  | -4.132184 | -4.077242 | -2.200319 |
| H  | -0.893983 | 3.092414  | -3.445989 |
| Fe | 0.560887  | 0.221709  | 0.978702  |
| Cl | 1.241280  | 0.451349  | 3.258737  |
| H  | -1.217030 | 1.940412  | 3.179335  |
| H  | 1.688935  | -2.330401 | -1.371211 |
| C  | 1.273939  | -3.102503 | 0.562404  |

|   |           |           |           |
|---|-----------|-----------|-----------|
| C | 0.699753  | -2.776184 | 1.790721  |
| C | 2.299944  | -4.054061 | 0.522303  |
| C | 1.156315  | -3.364137 | 2.969903  |
| H | -0.118486 | -2.068198 | 1.831280  |
| C | 2.746584  | -4.659370 | 1.696443  |
| H | 2.759016  | -4.310420 | -0.428761 |
| C | 2.180329  | -4.309967 | 2.924859  |
| H | 0.717849  | -3.073920 | 3.919103  |
| H | 3.543658  | -5.394839 | 1.653957  |
| H | 2.538422  | -4.770072 | 3.840103  |
| C | -1.071149 | 3.250165  | 1.503509  |
| C | -1.430928 | 3.563248  | 0.188975  |
| C | -0.185444 | 4.083878  | 2.189791  |
| C | -0.921441 | 4.703287  | -0.425776 |
| H | -2.108094 | 2.914071  | -0.354222 |
| C | 0.336120  | 5.222977  | 1.570853  |
| H | 0.092201  | 3.846311  | 3.212588  |
| C | -0.036031 | 5.537051  | 0.263463  |
| H | -1.218217 | 4.943254  | -1.442040 |
| H | 1.020017  | 5.866158  | 2.115284  |
| H | 0.352781  | 6.431830  | -0.213011 |
| C | 3.292985  | 0.408710  | -0.435725 |
| C | 4.184781  | -0.314883 | -1.373359 |
| C | 4.808505  | 0.302409  | -2.474244 |
| C | 4.468642  | -1.670871 | -1.125202 |
| C | 5.655823  | -0.425175 | -3.306968 |
| H | 4.623978  | 1.347246  | -2.684101 |
| C | 5.320072  | -2.389690 | -1.962624 |
| H | 4.016019  | -2.161933 | -0.273216 |
| C | 5.916879  | -1.774436 | -3.062055 |
| H | 6.118841  | 0.071279  | -4.154540 |
| H | 5.519734  | -3.435661 | -1.747952 |
| H | 6.580742  | -2.333041 | -3.713737 |
| C | 2.454754  | 1.507249  | -0.732267 |
| O | 1.453379  | 1.840583  | -0.002542 |
| O | 2.791273  | 2.292448  | -1.766028 |
| C | 2.082036  | 3.539141  | -1.895229 |
| H | 2.359996  | 4.223525  | -1.089039 |
| H | 1.005994  | 3.380911  | -1.857884 |
| H | 2.392364  | 3.945587  | -2.856870 |
| O | 2.659044  | -0.430975 | 0.535818  |
| H | 4.250814  | 1.274558  | 0.534262  |
| H | 3.788434  | 2.353438  | 1.863682  |
| O | 4.667284  | 1.728467  | 1.427179  |
| H | 5.462070  | 2.239242  | 1.216529  |
| O | 2.723907  | 2.893069  | 2.255402  |
| H | 2.279266  | 2.219556  | 2.836375  |
| H | 2.118204  | 2.924125  | 1.481572  |
| H | 3.180324  | -0.495162 | 1.349951  |
